# Supplementary material for: Pincer cobalt complex-catalyzed Z-selective hydrosilylation of terminal alkynes
Source: Royal Society of Chemistry journal article supplement (doi:10.1039/c7qo00250e), 2017-01-01
Supplement: c7qo00250e1.pdf [file c7qo00250e1.pdf]

## Table of Contents

|                                                                                  |     |
|----------------------------------------------------------------------------------|-----|
| 1. General Information.....                                                      | S1  |
| 2. Procedure for Co-catalyzed Hydrosilylation of Alkynes.....                    | S2  |
| 3. Optimizations for Pd-catalyzed Hiyama-Denmark cross-coupling<br>reaction..... | S13 |
| 4. Procedure for Pd-catalyzed Hiyama-Denmark cross-coupling<br>reaction.....     | S15 |
| 5. References.....                                                               | S24 |
| 6. NMR Spectra.....                                                              | S25 |

---

# 1. General Information

## a. Materials

All manipulations were carried out using standard Schlenk, high-vacuum and glovebox techniques. Tetrahydrofuran (THF) was distilled from sodium benzophenoneketyl prior to use. The following chemicals were purchased and used as received: Pd(OAc)<sub>2</sub> (J&K), Pd(PPh<sub>3</sub>)<sub>4</sub> (Alfa Aesar), PdCl<sub>2</sub> (J&K), Pd<sub>2</sub>dba<sub>3</sub> (J&K), (Pd-η<sup>2</sup>-C<sub>3</sub>H<sub>5</sub>Cl)<sub>2</sub> (Strem), NaBEt<sub>3</sub>H (1.0 M in THF, Aldrich), TBAF (1.0 M in THF, TCI), PhSiH<sub>3</sub> (TCI), Ph<sub>2</sub>SiH<sub>2</sub> (J&K), (EtO)<sub>3</sub>SiH (TCI), MD'M (TCI). The following compounds, (P<sup>C</sup>NN)FeCl<sub>2</sub> (**1a-b**),<sup>[1]</sup> (P<sup>C</sup>NN)CoCl<sub>2</sub> (**2a-b**),<sup>[1]</sup> *tert*-butyl(hept-6-yn-1-yloxy)dimethylsilane (**3l**),<sup>[2]</sup> *tert*-butyl(hept-6-yn-1-yloxy)diphenylsilane (**3m**),<sup>[2]</sup> hept-6-yn-1-yl 4-methylbenzenesulfonate (**3n**)<sup>[3]</sup> were prepared according to procedures previously reported. All other chemicals were purchased from TCI, Alfa Aesar, Aldrich or J&K, Chemical Co., and used as received unless otherwise noted.

## b. Analytical Methods

NMR spectra were recorded on Agilent 400 MHz, 600 MHz or Varian Mercury 400 MHz. <sup>1</sup>H NMR chemical shifts were referenced to residual protio solvent peaks or tetramethylsilane signal (0 ppm), and <sup>13</sup>C NMR chemical shifts were referenced to the solvent resonance. <sup>31</sup>P NMR chemical shifts were referenced to an external H<sub>3</sub>PO<sub>4</sub> standard. Data for <sup>1</sup>H NMR are recorded as follows: chemical shift (δ, ppm), multiplicity (s = singlet, d = doublet, t = triplet, m = multiplet or unresolved, coupling constant (s) in Hz, integration). Data for <sup>13</sup>C NMR are reported in terms of chemical shift (δ, ppm). Elemental analysis and high resolution mass spectrometer (HR-MS) were carried out by the Analytical Laboratory of Shanghai Institute of Organic Chemistry (CAS).

---

## 2. Procedure for Co-catalyzed Hydrosilylation of Alkynes

**General procedure for hydrosilylation using cobalt complex **2b**.** In a nitrogen filled glovebox, the cobalt complex **2b** (3.2 mg, 1 mol %),  $\text{Ph}_2\text{SiH}_2$  (0.6 mmol, 1 equiv) and alkene **3** (0.9 mmol, 1.5 equiv) were added to a 5 mL tube equipped with a magnetic stir bar. The reaction mixture was chilled in the freezer to  $-38\text{ }^\circ\text{C}$  and  $\text{NaBEt}_3\text{H}$  (12  $\mu\text{L}$ , 2 mol %) was then added to the reaction mixture. The reaction was stirred at  $25\text{ }^\circ\text{C}$  for 24 h and was quenched by exposing the solution to air. The resulting solution was concentrated in vacuum and the residue was purified by chromatography on silica gel.

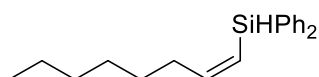

### **(Z)-oct-1-en-1-yl-diphenylsilane **4a****

The reaction was carried out according to the typical procedure by using **3a** (99.2 mg, 0.90 mmol),  $\text{Ph}_2\text{SiH}_2$  (110.6 mg, 0.60 mmol), cobalt complex **2b** (3.2 mg, 1 mol %) and  $\text{NaBEt}_3\text{H}$  (12  $\mu\text{L}$ , 2 mol %). Purification by silica gel chromatography (*n*-hexane as eluent) afforded the title compound as a colorless oil (155 mg, 88%, *Z/E* = 99:1).  $^1\text{H}$  NMR (400 MHz,  $\text{CDCl}_3$ )  $\delta$  7.61 – 7.56 (m, 4H), 7.43 – 7.33 (m, 6H), 6.67 (dt, *J* = 14.5, 7.3 Hz, 1H), 5.84 (dd, *J* = 13.7, 5.4 Hz, 1H), 5.27 (d, *J* = 5.3 Hz, 1H), 2.20 (dd, *J* = 14.9, 7.5 Hz, 2H), 1.37 – 1.30 (m, 2H), 1.29 – 1.18 (m, 6H), 0.85 (t, *J* = 6.9 Hz, 3H).  $^{13}\text{C}$  NMR (101 MHz,  $\text{CDCl}_3$ )  $\delta$  153.9, 135.4, 134.7, 129.6, 128.1, 121.5, 33.9, 31.8, 29.4, 29.0, 22.7, 14.2. HRMS-EI (*m/z*): Calcd for  $[\text{C}_{20}\text{H}_{26}\text{Si}]^+$ , 294.1804; found: 294.1798.

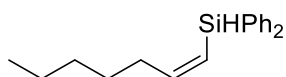

### **(Z)-hept-1-en-1-yl-diphenylsilane **4b****

The reaction was carried out according to the typical procedure by using **3b** (86.6 mg, 0.90 mmol),  $\text{Ph}_2\text{SiH}_2$  (110.6 mg, 0.60 mmol), cobalt complex **2b** (3.2 mg, 1 mol %)

and NaBEt<sub>3</sub>H (12  $\mu$ L, 2 mol %). Purification by silica gel chromatography (*n*-hexane as eluent) afforded the title compound as a colorless oil (148 mg, 88%, *Z/E* = 98:2). <sup>1</sup>H NMR (400 MHz, CDCl<sub>3</sub>)  $\delta$  7.62 – 7.54 (m, 4H), 7.43 – 7.33 (m, 6H), 6.67 (dt, *J* = 14.5, 7.5 Hz, 1H), 5.84 (dd, *J* = 13.6, 5.1 Hz, 1H), 5.27 (d, *J* = 5.3 Hz, 1H), 2.20 (q, *J* = 7.3 Hz, 2H), 1.39 – 1.31 (m, 2H), 1.27 – 1.17 (m, 4H), 0.83 (t, *J* = 6.8 Hz, 3H). <sup>13</sup>C NMR (101 MHz, CDCl<sub>3</sub>)  $\delta$  153.9, 135.4, 134.7, 129.6, 128.1, 121.5, 33.9, 31.5, 29.1, 22.6, 14.2. HRMS-EI (*m/z*): Calcd for [C<sub>19</sub>H<sub>24</sub>Si<sup>+</sup>], 280.1647; found: 280.1651.

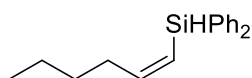

**(Z)-hex-1-en-1-ylidiphenylsilane 4c**

The reaction was carried out according to the typical procedure by using **3c** (73.9 mg, 0.90 mmol), Ph<sub>2</sub>SiH<sub>2</sub> (110.6 mg, 0.60 mmol), cobalt complex **2b** (3.2 mg, 1 mol %) and NaBEt<sub>3</sub>H (12  $\mu$ L, 2 mol %). Purification by silica gel chromatography (*n*-hexane as eluent) afforded the title compound as a colorless oil (145 mg, 91%, *Z/E* = 99:1). <sup>1</sup>H NMR (400 MHz, CDCl<sub>3</sub>)  $\delta$  7.61 – 7.54 (m, 4H), 7.42 – 7.33 (m, 6H), 6.67 (dt, *J* = 14.3, 7.4 Hz, 1H), 5.84 (dd, *J* = 13.8, 5.4 Hz, 1H), 5.28 (d, *J* = 5.4 Hz, 1H), 2.21 (q, *J* = 7.2 Hz, 2H), 1.36 – 1.29 (m, 2H), 1.28 – 1.21 (m, 2H), 0.82 (t, *J* = 7.2 Hz, 3H). <sup>13</sup>C NMR (101 MHz, CDCl<sub>3</sub>)  $\delta$  153.8, 135.4, 134.7, 129.6, 128.1, 121.5, 33.6, 31.6, 22.4, 14.1. HRMS-EI (*m/z*): Calcd for [C<sub>18</sub>H<sub>22</sub>Si<sup>+</sup>], 266.1491; found: 266.1493.

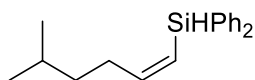

**(Z)-(5-methylhex-1-en-1-yl)diphenylsilane 4d**

The reaction was carried out according to the typical procedure by using **3d** (86.6 mg, 0.90 mmol), Ph<sub>2</sub>SiH<sub>2</sub> (110.6 mg, 0.60 mmol), cobalt complex **2b** (3.2 mg, 1 mol %) and NaBEt<sub>3</sub>H (12  $\mu$ L, 2 mol %). Purification by silica gel chromatography (*n*-hexane as eluent) afforded the title compound as a colorless oil (103 mg, 61%, *Z/E* = 93:7). <sup>1</sup>H NMR (400 MHz, CDCl<sub>3</sub>)  $\delta$  7.57 (t, *J* = 7.5 Hz, 4H), 7.41 – 7.34 (m, 6H), 6.66 (dt, *J* = 14.3, 7.4 Hz, 1H), 5.83 (dd, *J* = 13.8, 5.4 Hz, 1H), 5.28 (d, *J* = 5.3 Hz, 1H), 2.19

(q,  $J = 7.7$  Hz, 2H), 1.50 – 1.43 (m, 1H), 1.27 – 1.19 (m, 2H), 0.79 (d,  $J = 6.6$  Hz, 6H).  $^{13}\text{C}$  NMR (101 MHz,  $\text{CDCl}_3$ )  $\delta$  154.0, 135.4, 134.7, 129.6, 128.1, 121.3, 38.5, 31.9, 27.8, 22.6. HRMS-EI ( $m/z$ ): Calcd for  $[\text{C}_{19}\text{H}_{24}\text{Si}^+]$ , 280.1647; found: 280.1650.

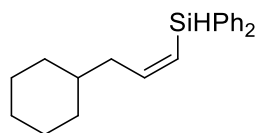

**(Z)-(3-cyclohexylprop-1-en-1-yl)diphenylsilane 4e**

The reaction was carried out according to the typical procedure by using **3e** (110.0 mg, 0.90 mmol),  $\text{Ph}_2\text{SiH}_2$  (110.6 mg, 0.60 mmol), cobalt complex **2b** (3.2 mg, 1 mol %) and  $\text{NaBEt}_3\text{H}$  (12  $\mu\text{L}$ , 2 mol %). Purification by silica gel chromatography (*n*-hexane as eluent) afforded the title compound as a colorless oil (152 mg, 83%,  $Z/E = 91:9$ ).  $^1\text{H}$  NMR (400 MHz,  $\text{CDCl}_3$ )  $\delta$  7.63 – 7.54 (m, 4H), 7.44 – 7.33 (m, 6H), 6.69 (dt,  $J = 14.5$ , 7.4 Hz, 1H), 5.87 (dd,  $J = 13.7$ , 5.6 Hz, 1H), 5.28 (d,  $J = 5.5$  Hz, 1H), 2.12 (t,  $J = 7.2$  Hz, 2H), 1.70 – 1.58 (m, 5H), 1.36 – 1.29 (m, 1H), 1.23 – 1.07 (m, 3H), 0.91 – 0.81 (m, 2H).  $^{13}\text{C}$  NMR (101 MHz,  $\text{CDCl}_3$ )  $\delta$  152.6, 135.4, 134.7, 129.6, 128.1, 122.3, 41.4, 38.3, 33.1, 26.6, 26.5. HRMS-EI ( $m/z$ ): Calcd for  $[\text{C}_{21}\text{H}_{26}\text{Si}^+]$ , 306.1804; found: 306.1805.

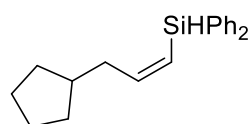

**(Z)-(3-cyclopentylprop-1-en-1-yl)diphenylsilane 4f**

The reaction was carried out according to the typical procedure by using **3f** (97.4 mg, 0.90 mmol),  $\text{Ph}_2\text{SiH}_2$  (110.6 mg, 0.60 mmol), cobalt complex **2b** (3.2 mg, 1 mol %) and  $\text{NaBEt}_3\text{H}$  (12  $\mu\text{L}$ , 2 mol %). Purification by silica gel chromatography (*n*-hexane as eluent) afforded the title compound as a colorless oil (102 mg, 58%,  $Z/E = 90:10$ ).  $^1\text{H}$  NMR (400 MHz,  $\text{CDCl}_3$ )  $\delta$  7.63 – 7.57 (m, 4H), 7.43 – 7.35 (m, 6H), 6.71 (dt,  $J = 14.4$ , 7.4 Hz, 1H), 5.87 (dd,  $J = 13.8$ , 5.5 Hz, 1H), 5.30 (d,  $J = 5.5$  Hz, 1H), 2.25 (t,  $J = 7.3$  Hz, 2H), 1.86 (p,  $J = 7.7$  Hz, 1H), 1.74 – 1.66 (m, 2H), 1.61 – 1.43 (m, 4H),

1.17 – 1.07 (m, 2H).  $^{13}\text{C}$  NMR (101 MHz,  $\text{CDCl}_3$ )  $\delta$  153.0, 135.3, 134.6, 129.5, 128.0, 121.6, 39.9, 39.7, 32.1, 25.0. HRMS-EI ( $m/z$ ): Calcd for  $[\text{C}_{20}\text{H}_{24}\text{Si}]^+$ , 292.1647; found: 292.1645.

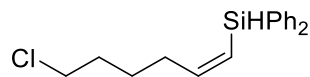

**(Z)-(6-chlorohex-1-en-1-yl)diphenylsilane 4g**

The reaction was carried out according to the typical procedure by using **3g** (104.9 mg, 0.90 mmol),  $\text{Ph}_2\text{SiH}_2$  (110.6 mg, 0.60 mmol), cobalt complex **2b** (3.2 mg, 1 mol %) and  $\text{NaBEt}_3\text{H}$  (12  $\mu\text{L}$ , 2 mol %). Purification by silica gel chromatography (*n*-hexane as eluent) afforded the title compound as a colorless oil (152 mg, 83%, *Z/E* = 98:2).  $^1\text{H}$  NMR (400 MHz,  $\text{CDCl}_3$ )  $\delta$  7.58 (d,  $J$  = 7.4 Hz, 4H), 7.38 (q,  $J$  = 7.7, 6.7 Hz, 6H), 6.64 (dt,  $J$  = 14.3, 7.4 Hz, 1H), 5.90 (dd,  $J$  = 13.8, 5.1 Hz, 1H), 5.26 (d,  $J$  = 5.3 Hz, 1H), 3.43 (t,  $J$  = 6.7 Hz, 2H), 2.23 (q,  $J$  = 7.4 Hz, 2H), 1.67 (p,  $J$  = 6.9 Hz, 2H), 1.49 (p,  $J$  = 7.6 Hz, 2H).  $^{13}\text{C}$  NMR (101 MHz,  $\text{CDCl}_3$ )  $\delta$  152.6, 135.3, 134.3, 129.6, 128.1, 122.5, 44.8, 32.9, 31.9, 26.4. HRMS-EI ( $m/z$ ): Calcd for  $[\text{C}_{18}\text{H}_{21}\text{ClSi}]^+$ , 300.1101; found: 300.1093.

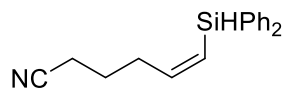

**(Z)-6-(diphenylsilyl)hex-5-enenitrile 4h**

The reaction was carried out according to the typical procedure by using **3h** (88.3 mg, 1.2 mmol),  $\text{Ph}_2\text{SiH}_2$  (110.6 mg, 0.60 mmol), cobalt complex **2b** (3.2 mg, 1 mol %) and  $\text{NaBEt}_3\text{H}$  (12  $\mu\text{L}$ , 2 mol %). Purification by silica gel chromatography (*n*-hexane/ethyl acetate = 30/1 as eluent) afforded the title compound as a colorless oil (113 mg, 68%, *Z*- $\beta/\alpha$  = 84:16).  $^1\text{H}$  NMR (400 MHz,  $\text{CDCl}_3$ )  $\delta$  7.60 – 7.54 (m, 4H), 7.44 – 7.35 (m, 6H), 6.59 (dt,  $J$  = 14.4, 7.4 Hz, 1H), 6.00 (dd,  $J$  = 13.8, 5.1 Hz, 1H), 5.27 (d,  $J$  = 5.2 Hz, 1H), 2.33 (q,  $J$  = 7.6 Hz, 2H), 2.16 (t,  $J$  = 7.4 Hz, 2H), 1.69 (p,  $J$  = 7.2 Hz, 2H).  $^{13}\text{C}$  NMR (101 MHz,  $\text{CDCl}_3$ )  $\delta$  150.2, 135.3, 134.0, 129.9, 128.2, 124.8, 119.6, 32.5, 25.1, 16.5. HRMS-EI ( $m/z$ ): Calcd for  $[\text{C}_{18}\text{H}_{19}\text{NSi}]^+$ , 277.1287; found: 277.1282.

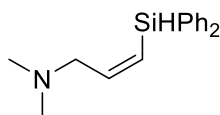

**(Z)-3-(diphenylsilyl)-N,N-dimethylprop-2-en-1-amine 4i**

The reaction was carried out according to the typical procedure by using **3i** (74.8 mg, 0.9 mmol), Ph<sub>2</sub>SiH<sub>2</sub> (110.6 mg, 0.60 mmol), cobalt complex **2b** (3.2 mg, 1 mol %) and NaBEt<sub>3</sub>H (12 μL, 2 mol %). Purification by silica gel chromatography (*n*-hexane/ethyl acetate = 1/1 as eluent) afforded the title compound as a pale yellow oil (150 mg, 92%, *Z/E* = 98:2). <sup>1</sup>H NMR (400 MHz, CDCl<sub>3</sub>) δ 7.59 – 7.54 (m, 4H), 7.39 – 7.34 (m, 6H), 6.71 (dt, *J* = 13.1, 6.2 Hz, 1H), 6.05 (dd, *J* = 13.9, 5.1 Hz, 1H), 5.28 (d, *J* = 5.1 Hz, 1H), 3.06 (d, *J* = 6.2 Hz, 2H), 2.13 (s, 6H). <sup>13</sup>C NMR (101 MHz, CDCl<sub>3</sub>) δ 150.0, 135.2, 134.9, 129.6, 128.1, 124.9, 61.2, 45.2. HRMS-EI (*m/z*): Calcd for [C<sub>17</sub>H<sub>21</sub>NSi<sup>+</sup>], 267.1443; found: 267.1442.

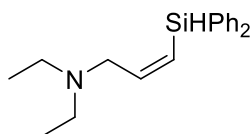

**(Z)-3-(diphenylsilyl)-N,N-diethylprop-2-en-1-amine 4j**

The reaction was carried out according to the typical procedure by using **3j** (100.1 mg, 0.9 mmol), Ph<sub>2</sub>SiH<sub>2</sub> (110.6 mg, 0.60 mmol), cobalt complex **2b** (3.2 mg, 1 mol %) and NaBEt<sub>3</sub>H (12 μL, 2 mol %). Purification by silica gel chromatography (*n*-hexane/ethyl acetate = 1/1 as eluent) afforded the title compound as a pale yellow oil (156 mg, 88%, *Z/E* = 98:2). <sup>1</sup>H NMR (400 MHz, CDCl<sub>3</sub>) δ 7.61 – 7.55 (m, 4H), 7.42 – 7.34 (m, 6H), 6.75 (dt, *J* = 13.5, 6.5 Hz, 1H), 6.02 (dd, *J* = 14.5, 5.3 Hz, 1H), 5.31 (d, *J* = 5.5 Hz, 1H), 3.23 (d, *J* = 6.3 Hz, 2H), 2.48 (q, *J* = 7.3 Hz, 4H), 0.96 (t, *J* = 7.1 Hz, 6H). <sup>13</sup>C NMR (101 MHz, CDCl<sub>3</sub>) δ 151.0, 135.3, 134.4, 129.7, 128.1, 124.0, 55.4, 46.7, 11.6. HRMS-EI (*m/z*): Calcd for [C<sub>19</sub>H<sub>25</sub>NSi<sup>+</sup>], 295.1756; found: 295.1764.

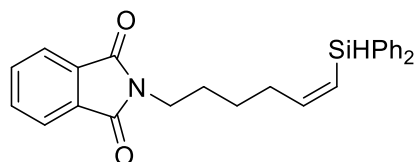

**(Z)-2-(6-(diphenylsilyl)hex-5-en-1-yl)isoindoline-1,3-dione 4k**

The reaction was carried out according to the typical procedure by using **3k** (205.2 mg, 1.20 mmol),  $\text{Ph}_2\text{SiH}_2$  (110.6 mg, 0.60 mmol), cobalt complex **2b** (3.2 mg, 1 mol %) and  $\text{NaBEt}_3\text{H}$  (12  $\mu\text{L}$ , 2 mol %). Purification by silica gel chromatography (*n*-hexane/ethyl acetate = 10/1 as eluent) afforded the title compound as a yellow oil (210 mg, 85%, *Z/E* = 97:3).  $^1\text{H}$  NMR (400 MHz,  $\text{CDCl}_3$ )  $\delta$  7.87 – 7.82 (m, 2H), 7.73 – 7.70 (m, 2H), 7.58 – 7.52 (m, 4H), 7.41 – 7.29 (m, 6H), 6.62 (dt, *J* = 13.8, 7.4 Hz, 1H), 5.86 (dd, *J* = 13.7, 5.4 Hz, 1H), 5.24 (d, *J* = 5.3 Hz, 1H), 3.58 (t, *J* = 7.2 Hz, 2H), 2.23 (q, *J* = 7.3 Hz, 2H), 1.59 – 1.51 (m, 2H), 1.43 – 1.32 (m, 2H).  $^{13}\text{C}$  NMR (101 MHz,  $\text{CDCl}_3$ )  $\delta$  168.5, 152.8, 135.3, 134.5, 134.0, 132.2, 129.6, 128.1, 123.3, 122.4, 37.9, 33.3, 28.2, 26.6. HRMS-EI (*m/z*): Calcd for  $[\text{C}_{26}\text{H}_{25}\text{NO}_2\text{Si}]^+$ , 411.1655; found: 411.1649.

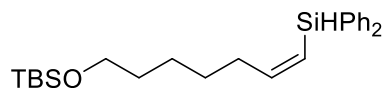

**(Z)-tert-butyl((7-(diphenylsilyl)hept-6-en-1-yl)oxy)dimethylsilane 4l**

The reaction was carried out according to the typical procedure by using **3l** (204.3 mg, 0.90 mmol),  $\text{Ph}_2\text{SiH}_2$  (110.6 mg, 0.60 mmol), cobalt complex **2b** (3.2 mg, 1 mol %) and  $\text{NaBEt}_3\text{H}$  (12  $\mu\text{L}$ , 2 mol %). Purification by silica gel chromatography (*n*-hexane/ethyl acetate = 50/1 as eluent) afforded the title compound as a colorless oil (222 mg, 90%, *Z/E* = 98:2).  $^1\text{H}$  NMR (400 MHz,  $\text{CDCl}_3$ )  $\delta$  7.61 – 7.53 (m, 4H), 7.43 – 7.31 (m, 6H), 6.66 (dt, *J* = 14.4, 7.4 Hz, 1H), 5.84 (dd, *J* = 13.7, 5.4 Hz, 1H), 5.26 (d, *J* = 5.3 Hz, 1H), 3.53 (t, *J* = 6.6 Hz, 2H), 2.20 (q, *J* = 7.4 Hz, 2H), 1.47 – 1.31 (m, 4H), 1.29 – 1.21 (m, 2H), 0.89 (s, 9H), 0.03 (s, 6H).  $^{13}\text{C}$  NMR (101 MHz,  $\text{CDCl}_3$ )  $\delta$  153.6, 135.4, 134.7, 129.6, 128.1, 121.7, 63.3, 33.9, 32.8, 29.2, 26.1, 25.5, 18.5, -5.1. HRMS-EI (*m/z*): Calcd for  $[\text{C}_{21}\text{H}_{29}\text{OSi}_2]^+$ , 353.1757; found: 353.1760.



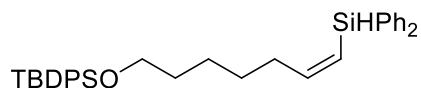

**(Z)-tert-butyl((7-(diphenylsilyl)hept-6-en-1-yl)oxy)diphenylsilane 4m**

The reaction was carried out according to the typical procedure by using **3m** (316.1 mg, 0.90 mmol), Ph<sub>2</sub>SiH<sub>2</sub> (110.6 mg, 0.60 mmol), cobalt complex **2b** (3.2 mg, 1 mol %) and NaBEt<sub>3</sub>H (12 μL, 2 mol %). Purification by silica gel chromatography (*n*-hexane/ethyl acetate = 50/1 as eluent) afforded the title compound as a colorless oil (300 mg, 93%, *Z/E* = 98/2). <sup>1</sup>H NMR (400 MHz, CDCl<sub>3</sub>) δ 7.69 – 7.63 (m, 4H), 7.60 – 7.54 (m, 4H), 7.43 – 7.33 (m, 12H), 6.64 (dt, *J* = 14.4, 7.4 Hz, 1H), 5.83 (dd, *J* = 13.8, 5.2 Hz, 1H), 5.26 (d, *J* = 5.3 Hz, 1H), 3.58 (t, *J* = 6.5 Hz, 2H), 2.18 (q, *J* = 7.1 Hz, 2H), 1.52 – 1.44 (m, 2H), 1.37 – 1.22 (m, 4H), 1.04 (s, 9H). <sup>13</sup>C NMR (101 MHz, CDCl<sub>3</sub>) δ 153.7, 135.7, 135.4, 134.7, 134.3, 129.6, 128.1, 127.7, 121.7, 64.0, 33.9, 32.5, 29.1, 27.0, 25.5, 19.4. HRMS-EI (*m/z*): Calcd for [C<sub>31</sub>H<sub>33</sub>OSi<sub>2</sub>]<sup>+</sup>, 477.2070; found: 477.2062.

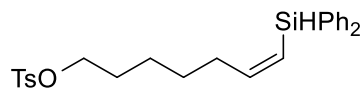

**(Z)-7-(diphenylsilyl)hept-6-en-1-yl 4-methylbenzenesulfonate 4n**

The reaction was carried out according to the typical procedure by using **3n** (240.0 mg, 0.9 mmol), Ph<sub>2</sub>SiH<sub>2</sub> (110.6 mg, 0.60 mmol), cobalt complex **2b** (3.2 mg, 1 mol %) and NaBEt<sub>3</sub>H (12 μL, 2 mol %). Purification by silica gel chromatography (*n*-hexane/ethyl acetate = 5/1 as eluent) afforded the title compound as a colorless oil (237 mg, 88%, *Z/E* = 99:1). <sup>1</sup>H NMR (400 MHz, CDCl<sub>3</sub>) δ 7.80 – 7.75 (m, 2H), 7.60 – 7.53 (m, 4H), 7.41 – 7.30 (m, 8H), 6.58 (dt, *J* = 14.3, 7.4 Hz, 1H), 5.85 (dd, *J* = 13.8, 5.3 Hz, 1H), 5.23 (d, *J* = 5.3 Hz, 1H), 3.93 (t, *J* = 6.5 Hz, 2H), 2.44 (s, 3H), 2.14 (q, *J* = 7.3 Hz, 2H), 1.57 – 1.49 (m, 2H), 1.33 – 1.17 (m, 4H). <sup>13</sup>C NMR (101 MHz, CDCl<sub>3</sub>) δ 153.0, 144.7, 135.3, 134.4, 133.2, 129.9, 129.7, 128.1, 127.9, 122.1, 70.6, 33.5, 28.6, 28.5, 24.9, 21.7. HRMS-ESI (*m/z*): Calcd for [(C<sub>26</sub>H<sub>30</sub>O<sub>3</sub>SSi+NH<sub>4</sub>)<sup>+</sup>], 468.2023; found: 468.2021.

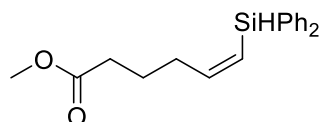

#### **methyl (Z)-6-(diphenylsilyl)hex-5-enoate 4o**

The reaction was carried out according to the typical procedure by using **3o** (113.5 mg, 0.90 mmol), Ph<sub>2</sub>SiH<sub>2</sub> (110.6 mg, 0.60 mmol), cobalt complex **2b** (6.4 mg, 2 mol %) and NaBEt<sub>3</sub>H (24 μL, 4 mol %). Purification by silica gel chromatography (*n*-hexane/ethyl acetate = 50/1 as eluent) afforded the title compound as a colorless oil (148 mg, 80%, *Z/E* = 98:2). <sup>1</sup>H NMR (400 MHz, CDCl<sub>3</sub>) δ 7.62 – 7.51 (m, 4H), 7.45 – 7.32 (m, 6H), 6.62 (dt, *J* = 14.3, 7.4 Hz, 1H), 5.90 (dd, *J* = 14.0, 5.4 Hz, 1H), 5.25 (d, *J* = 5.4 Hz, 1H), 3.62 (s, 3H), 2.23 (q, *J* = 7.2 Hz, 4H), 1.70 (p, *J* = 7.5 Hz, 2H). <sup>13</sup>C NMR (101 MHz, CDCl<sub>3</sub>) δ 174.0, 152.1, 135.3, 134.3, 129.7, 128.1, 123.0, 51.6, 33.4, 33.0, 24.5. HRMS-EI (*m/z*): Calcd for [C<sub>19</sub>H<sub>22</sub>O<sub>2</sub>Si+], 310.1389; found: 310.1393.

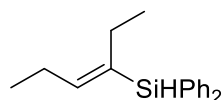

#### **(E)-hex-3-en-3-ylidiphenylsilane 4p**

The reaction was carried out according to the typical procedure by using **3p** (49.3 mg, 0.60 mmol), Ph<sub>2</sub>SiH<sub>2</sub> (110.6 mg, 0.60 mmol), cobalt complex **2b** (3.2 mg, 1 mol %) and NaBEt<sub>3</sub>H (12 μL, 2 mol %, *Z/E* = 99:1). Purification by silica gel chromatography (*n*-hexane as eluent) afforded the title compound as a colorless oil (134 mg, 84%). <sup>1</sup>H NMR (400 MHz, CDCl<sub>3</sub>) δ 7.61 – 7.53 (m, 4H), 7.44 – 7.33 (m, 6H), 5.89 (t, *J* = 6.9 Hz, 1H), 5.08 (s, 1H), 2.29 – 2.16 (m, 4H), 0.99 (t, *J* = 7.5 Hz, 3H), 0.90 (t, *J* = 7.6 Hz, 3H). <sup>13</sup>C NMR (101 MHz, CDCl<sub>3</sub>) δ 147.9, 136.1, 135.9, 134.3, 129.6, 128.0, 23.4, 22.1, 14.7, 14.2. These spectroscopic data correspond to reported data.<sup>[4]</sup>

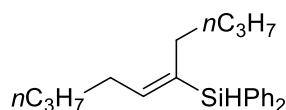

#### **(E)-dec-5-en-5-ylidiphenylsilane 4q**

The reaction was carried out according to the typical procedure by using **3q** (124.4 mg, 0.90 mmol), Ph<sub>2</sub>SiH<sub>2</sub> (110.6 mg, 0.60 mmol), cobalt complex **2b** (3.2 mg, 1 mol %) and NaBEt<sub>3</sub>H (12 μL, 2 mol %). Purification by silica gel chromatography (*n*-hexane as eluent) afforded the title compound as a colorless oil (138 mg, 71%, *Z/E* = 99:1). <sup>1</sup>H NMR (400 MHz, CDCl<sub>3</sub>) δ 7.63 – 7.54 (m, 4H), 7.44 – 7.34 (m, 6H), 5.92 (t, *J* = 6.9 Hz, 1H), 5.10 (s, 1H), 2.28 – 2.16 (m, 4H), 1.40 – 1.22 (m, 8H), 0.93 (t, *J* = 6.9 Hz, 3H), 0.82 (t, *J* = 6.9 Hz, 3H). <sup>13</sup>C NMR (101 MHz, CDCl<sub>3</sub>) δ 146.7, 135.8, 135.1, 134.4, 129.5, 128.0, 32.1, 31.7, 30.3, 28.7, 23.0, 22.7, 14.2, 14.0. These spectroscopic data correspond to reported data.<sup>[4]</sup>

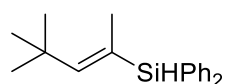

**(E)-(4,4-dimethylpent-2-en-2-yl)diphenylsilane 4r**

The reaction was carried out according to the typical procedure by using **3r** (86.6 mg, 0.90 mmol), Ph<sub>2</sub>SiH<sub>2</sub> (110.6 mg, 0.60 mmol), cobalt complex **2b** (3.2 mg, 1 mol %) and NaBEt<sub>3</sub>H (12 μL, 2 mol %). Purification by silica gel chromatography (*n*-hexane as eluent) afforded the title compound as a colorless oil (139 mg, 82%, regioselectivity 99:1). <sup>1</sup>H NMR (400 MHz, CDCl<sub>3</sub>) δ 7.57 – 7.52 (m, 4H), 7.44 – 7.34 (m, 6H), 6.01 (s, 1H), 4.98 (s, 1H), 1.91 (s, 3H), 1.17 (s, 9H). <sup>13</sup>C NMR (101 MHz, CDCl<sub>3</sub>) δ 155.6, 135.8, 134.2, 129.6, 129.0, 128.0, 35.3, 30.8, 16.5. These spectroscopic data correspond to reported data.<sup>[5]</sup>

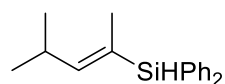

**(E)-(4-methylpent-2-en-2-yl)diphenylsilane 4s**

The reaction was carried out according to the typical procedure by using **3s** (73.9 mg, 0.90 mmol), Ph<sub>2</sub>SiH<sub>2</sub> (110.6 mg, 0.60 mmol), cobalt complex **2b** (3.2 mg, 1 mol %) and NaBEt<sub>3</sub>H (12 μL, 2 mol %). Purification by silica gel chromatography (*n*-hexane as eluent) afforded the title compound as a colorless oil (127 mg, 80%,

regioselectivity 90:10).  $^1\text{H}$  NMR (400 MHz,  $\text{CDCl}_3$ )  $\delta$  7.59 – 7.52 (m, 4H), 7.43 – 7.33 (m, 6H), 5.83 (d,  $J$  = 8.9 Hz, 1H), 5.01 (s, 1H), 2.79 (dq,  $J$  = 13.5, 6.7 Hz, 1H), 1.78 (s, 3H), 0.98 (d,  $J$  = 6.6 Hz, 6H).  $^{13}\text{C}$  NMR (101 MHz,  $\text{CDCl}_3$ )  $\delta$  153.8, 135.8, 134.0, 129.6, 128.0, 127.2, 27.8, 22.6, 15.4. HRMS-EI ( $m/z$ ): Calcd for  $[\text{C}_{18}\text{H}_{22}\text{Si}^+]$ , 266.1491; found: 266.1500.

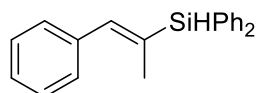

**(E)-diphenyl(1-phenylprop-1-en-2-yl)silane 4t**

The reaction was carried out according to the typical procedure by using **3t** (104.5 mg, 0.90 mmol),  $\text{Ph}_2\text{SiH}_2$  (110.6 mg, 0.60 mmol), cobalt complex **2b** (3.2 mg, 1 mol %) and  $\text{NaBEt}_3\text{H}$  (12  $\mu\text{L}$ , 2 mol %). Purification by silica gel chromatography (*n*-hexane as eluent) afforded the title compound as a colorless oil (169 mg, 94%, regioselectivity 91:9).  $^1\text{H}$  NMR (400 MHz,  $\text{CDCl}_3$ )  $\delta$  7.66 – 7.61 (m, 4H), 7.46 – 7.38 (m, 6H), 7.37 – 7.33 (m, 4H), 7.26 – 7.22 (m, 1H), 6.96 (s, 1H), 5.18 (s, 1H), 2.08 (s, 3H).  $^{13}\text{C}$  NMR (101 MHz,  $\text{CDCl}_3$ )  $\delta$  142.9, 138.0, 135.9, 134.2, 133.3, 129.9, 129.2, 128.2, 128.2, 127.1, 17.7. HRMS-EI ( $m/z$ ): Calcd for  $[\text{C}_{21}\text{H}_{20}\text{Si}^+]$ , 300.1334; found: 300.1331.

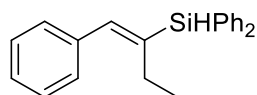

**(E)-diphenyl(1-phenylbut-1-en-2-yl)silane 4u**

The reaction was carried out according to the typical procedure by using **3u** (117.2 mg, 0.90 mmol),  $\text{Ph}_2\text{SiH}_2$  (110.6 mg, 0.60 mmol), cobalt complex **2b** (3.2 mg, 1 mol %) and  $\text{NaBEt}_3\text{H}$  (12  $\mu\text{L}$ , 2 mol %). Purification by silica gel chromatography (*n*-hexane as eluent) afforded the title compound as a colorless oil (175 mg, 93%, regioselectivity 88:12).  $^1\text{H}$  NMR (400 MHz,  $\text{CDCl}_3$ )  $\delta$  7.67 – 7.61 (m, 4H), 7.45 – 7.37 (m, 6H), 7.35 – 7.28 (m, 4H), 7.26 – 7.21 (m, 1H), 6.86 (s, 1H), 5.24 (s, 1H), 2.52 (q,  $J$  = 7.5 Hz, 2H), 1.05 (t,  $J$  = 7.5 Hz, 3H).  $^{13}\text{C}$  NMR (101 MHz,  $\text{CDCl}_3$ )  $\delta$

142.8, 141.0, 138.0, 136.0, 133.7, 129.8, 128.8, 128.3, 128.1, 127.1, 24.6, 14.6.  
HRMS-EI ( $m/z$ ): Calcd for  $[C_{22}H_{22}Si]^+$ , 314.1491; found: 314.1493.

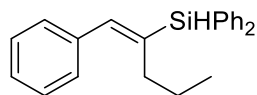

**(E)-diphenyl(1-phenylpent-1-en-2-yl)silane 4v**

The reaction was carried out according to the typical procedure by using **3v** (129.8 mg, 0.90 mmol),  $Ph_2SiH_2$  (110.6 mg, 0.60 mmol), cobalt complex **2b** (3.2 mg, 1 mol %) and  $NaBEt_3H$  (12  $\mu$ L, 2 mol %). Purification by silica gel chromatography (*n*-hexane as eluent) afforded the title compound as a colorless oil (179 mg, 91%, regioselectivity 91:9).  $^1H$  NMR (400 MHz,  $CDCl_3$ )  $\delta$  7.67 – 7.59 (m, 4H), 7.46 – 7.29 (m, 10H), 7.25 – 7.21 (m, 1H), 6.87 (s, 1H), 5.23 (s, 1H), 2.50 – 2.41 (m, 2H), 1.47 (q,  $J$  = 7.8 Hz, 2H), 0.84 (t,  $J$  = 7.3 Hz, 3H).  $^{13}C$  NMR (101 MHz,  $CDCl_3$ )  $\delta$  143.2, 139.6, 138.1, 135.9, 133.7, 129.8, 128.9, 128.3, 128.1, 127.1, 33.8, 23.2, 14.5. HRMS-EI ( $m/z$ ): Calcd for  $[C_{23}H_{24}Si]^+$ , 328.1647; found: 328.1642.

we determined the stereochemistry of the C=C bond by using NOSEY (**Figure S1**). For example, if the reaction of prop-1-yn-1-ylbenzene (**3t**) with  $Ph_2SiH_2$  formed the *Z*-product, there will be a signal resulting from the interaction between “ $CH_3$ ” and the olefinic H “Ph- $CH=$ ” moiety. However, we did not observe such a signal in the NOSEY spectrum.

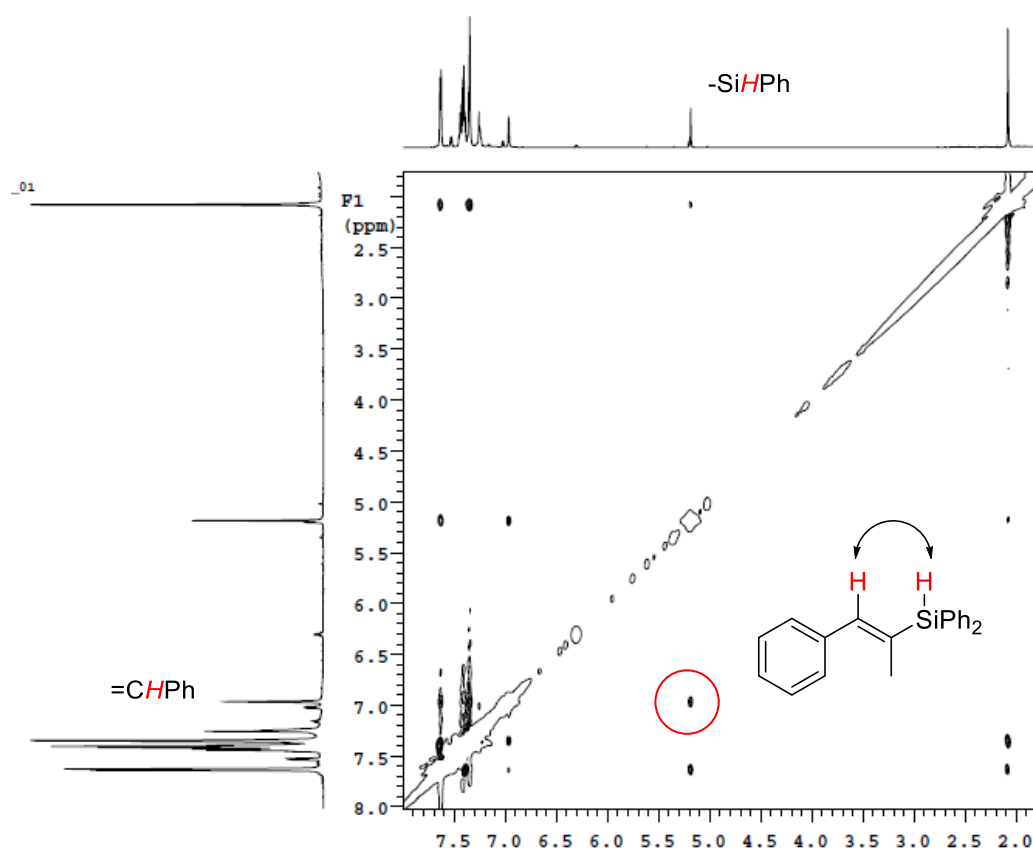

**Figure S1.** NOESY for compound **4t**

### 3. Optimizations for Pd-catalyzed Hiyama-Denmark cross-coupling reaction

**Table S1. Screening of Pd catalysts**

Reaction scheme showing the Hiyama-Denmark cross-coupling of **6a** (ethyl 4-iodobenzoate) and **4c** (pent-1-en-3-yn-1-yltrimethylsilane) catalyzed by [Pd] (10 mol%) in THF at T °C for 24 h, using TBAF (200 mol%) as a reagent, to yield **7a** (ethyl 4-(pent-1-en-3-yn-1-yl)benzoate).

| Entry | [Pd]                                                               | T (°C) | Yield (%) <sup>[a]</sup> |
|-------|--------------------------------------------------------------------|--------|--------------------------|
| 1     | Pd <sub>2</sub> dba <sub>3</sub>                                   | 35     | 92(84)                   |
| 2     | Pd(PPh <sub>3</sub> ) <sub>4</sub>                                 | 35     | 51                       |
| 3     | (Pd-η <sup>2</sup> -C <sub>3</sub> H <sub>5</sub> Cl) <sub>2</sub> | 35     | 82                       |
| 4     | PdCl <sub>2</sub>                                                  | 35     | 70                       |
| 5     | Pd(OAc) <sub>2</sub>                                               | 35     | 88                       |
| 6     | Pd(OAc) <sub>2</sub>                                               | 25     | 89                       |

[a] Conditions: **4c** (0.24 mmol), **5a** (0.2 mmol), TBAF (0.4 mmol) in THF (0.4 mL). The yield were determined by <sup>1</sup>H NMR with mesitylene as an internal standard.

**Table S2. Screening of Ligands**

c1ccc(cc1)-c2ccccc2I (**6f**) + CCCCC=C[SiHPh2] (**4c**)  $\xrightarrow[\text{THF, 30 } ^\circ\text{C, t h}]{\text{Pd(OAc)}_2 \text{ (10 mol\%)} \text{ Ligand (12 mol\%)} \text{ TBAF (200 mol\%)}}$  CCCCC=Cc1ccc(cc1)-c2ccccc2 (**7f**)

| Entry | Ligand                                       | t (h) | Yield (%) <sup>[a]</sup> | <i>E/Z</i> <sup>[b]</sup> |
|-------|----------------------------------------------|-------|--------------------------|---------------------------|
| 1     | --                                           | 24    | 80(71)                   | 70:30                     |
| 2     | JohnPhos                                     | 24    | 67                       | 84:16                     |
| 3     | X-Phos                                       | 24    | 79                       | 85:15                     |
| 4     | S-Phos                                       | 24    | 69                       | 80:20                     |
| 5     | RuPhos                                       | 24    | 74                       | 88:12                     |
| 6     | Pd( <i>P</i> tBu <sub>3</sub> ) <sub>2</sub> | 24    | --                       | --                        |
| 7     | dppb                                         | 24    | 98(93) <sup>[c]</sup>    | 91:9                      |
| 8     | dppf                                         | 24    | 98                       | 85:15                     |
| 9     | BINAP                                        | 24    | 79                       | 91:19                     |
| 10    | L1                                           | 24    | 91                       | 85:15                     |
| 11    | L2                                           | 24    | 96                       | 86:14                     |
| 12    | dppb                                         | 12    | 98                       | 94:6                      |
| 13    | dppb                                         | 6     | 96                       | 94:6                      |
| 14    | dppb                                         | 3     | 87                       | 94:6                      |

[a] Conditions: **4c** (0.24 mmol), **5f** (0.2 mmol), TBAF (0.4 mmol) and Ligand (0.024 mol) in THF (0.4 mL). The yield were determined by <sup>1</sup>H NMR with mesitylene as an internal standard.

[b] Determined by GC. [c] isolated yield.



#### 4. Procedure for Pd-catalyzed Hiyama-Denmark cross-coupling reaction

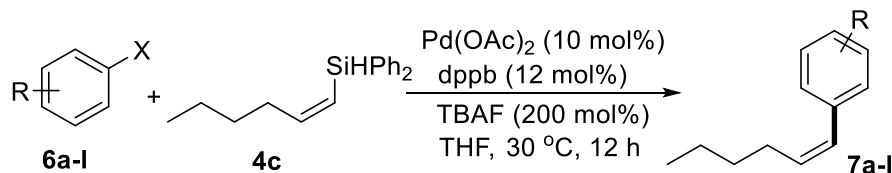

**General procedure for Pd-catalyzed Hiyama-Denmark cross-coupling of (Z)-vinylsilanes with aryl halides.** In a nitrogen filled glovebox, vinyl silane **4c** (64 mg, 0.24 mmol) was added to a 5 ml tube equipped with a magnetic stir bar. 0.4 ml of TBAF (0.4 mmol, 1.0 M in THF) was added and the solution was stirred for 5 min. Then arylhalides **6** (0.2 mmol),  $\text{Pd}(\text{OAc})_2$  (4.6 mg, 0.02 mmol) and dppb (10.2 mg, 0.024 mol) were added to the mixture. After that, the sealed tube was removed from the glovebox. The reaction mixture was stirred at 30 °C for 24 h. Then it was quenched by exposing the solution to air. The crude reaction mixture was purified by flash column chromatography.

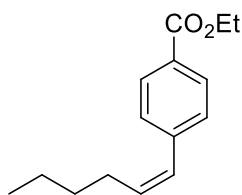

**ethyl (Z)-4-(hex-1-en-1-yl)benzoate (**7a**).** The reaction was carried out according to the typical procedure by using **6a** (55 mg, 0.20 mmol). Purification by preparative HPLC afforded the title compound as a colorless oil (41 mg, 89%, *Z/E* = 96:4).  $^1\text{H}$  NMR (400 MHz,  $\text{CDCl}_3$ )  $\delta$  8.00 (d, *J* = 8.3 Hz, 2H), 7.33 (d, *J* = 8.3 Hz, 2H), 6.43 (d, *J* = 11.7 Hz, 1H), 5.77 (dt, *J* = 11.7, 7.3 Hz, 1H), 4.37 (q, *J* = 7.1 Hz, 2H), 2.33 (q, *J* = 7.3 Hz, 2H), 1.49 – 1.29 (m, 7H), 0.89 (t, *J* = 7.2 Hz, 3H).  $^{13}\text{C}$  NMR (101 MHz,  $\text{CDCl}_3$ )  $\delta$  166.7, 142.5, 135.5, 129.5, 128.7, 128.4, 128.1, 61.0, 32.1, 28.6, 22.5, 14.5, 14.1. HRMS-EI (*m/z*): Calcd for  $[\text{C}_{15}\text{H}_{20}\text{O}_2]^+$ , 232.1463; found: 232.1465.

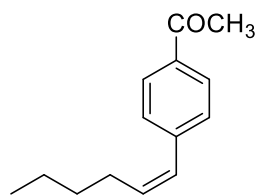

**(Z)-1-(4-(hex-1-en-1-yl)phenyl)ethan-1-one (7b).** The reaction was carried out according to the typical procedure by using **6b** (49 mg, 0.20 mmol). Purification by silica gel chromatography (petroleum ether/ethyl acetate = 50/1 as eluent) afforded the title compound as a pale yellow oil (31 mg, 77%, *Z/E* = 98:2). <sup>1</sup>H NMR (400 MHz, CDCl<sub>3</sub>) δ 7.92 (d, *J* = 8.0 Hz, 2H), 7.36 (d, *J* = 8.0 Hz, 2H), 6.43 (d, *J* = 12.0 Hz, 1H), 5.79 (dt, *J* = 11.6, 7.3 Hz, 1H), 2.60 (s, 3H), 2.34 (q, *J* = 7.2 Hz, 2H), 1.48 – 1.42 (m, 2H), 1.39 – 1.32 (m, 2H), 0.90 (t, *J* = 7.1 Hz, 3H). <sup>13</sup>C NMR (101 MHz, CDCl<sub>3</sub>) δ 197.8, 142.9, 135.8, 135.2, 129.0, 128.4, 128.0, 32.1, 28.7, 26.7, 22.5, 14.1. HRMS-EI (*m/z*): Calcd for [C<sub>14</sub>H<sub>18</sub>O<sup>+</sup>], 202.1358; found: 202.1360.

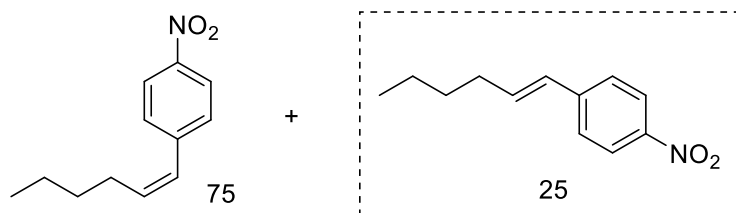

**(Z)-1-(hex-1-en-1-yl)-4-nitrobenzene (7c).** The reaction was carried out according to the typical procedure by using **6c** (46 mg, 0.20 mmol). Purification by silica gel chromatography (petroleum ether/ethyl acetate = 30/1 as eluent) afforded a mixture of *Z* and *E* isomer as a yellow oil (35 mg, 86%, *Z/E* = 75:25). <sup>1</sup>H NMR (400 MHz, CDCl<sub>3</sub>) δ 8.21 – 8.12 (m, 2H), 7.47 – 7.38 (m, 2H), 6.46 – 6.43 (m, 1H), 5.87 (dt, *J* = 11.8, 7.5 Hz, 75%, 1H, *Z* isomer), 2.37 – 2.25 (m, 2H), 1.51 – 1.43 (m, 2H), 1.37 (dt, *J* = 14.4, 7.2 Hz, 2H), 0.92 (dd, *J* = 15.4, 7.6 Hz, 3H). HRMS-EI (*m/z*): Calcd for [C<sub>12</sub>H<sub>15</sub>NO<sub>2</sub><sup>+</sup>], 205.1103; found: 205.1102.

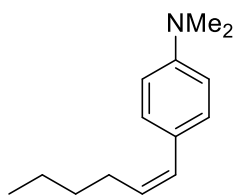

**(Z)-4-(hex-1-en-1-yl)-N,N-dimethylaniline (7d).** The reaction was carried out according to the typical procedure by using **6d** (50 mg, 0.20 mmol). Purification by preparative HPLC afforded the title compound as a yellow oil (25mg, 62%, *Z/E* = 94:6).  $^1\text{H}$  NMR (400 MHz,  $\text{CDCl}_3$ )  $\delta$  7.27 (d,  $J$  = 8.9 Hz, 2H), 6.72 (d,  $J$  = 8.7 Hz, 2H), 6.32 (d,  $J$  = 15.8 Hz, 1H), 6.05 (dt,  $J$  = 15.7, 6.9 Hz, 1H), 2.97 (s, 6H), 2.21 (q,  $J$  = 7.1 Hz, 2H), 1.50 – 1.35 (m, 4H), 0.95 (t,  $J$  = 7.1 Hz, 3H).  $^{13}\text{C}$  NMR (101 MHz,  $\text{CDCl}_3$ )  $\delta$  149.7, 129.5, 127.3, 127.0, 126.8, 112.9, 40.9, 32.9, 32.0, 22.4, 14.2. HRMS-EI ( $m/z$ ): Calcd for  $[\text{C}_{14}\text{H}_{21}\text{N}]^+$ , 203.1674; found: 203.1668.

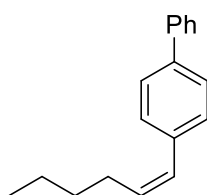

**(Z)-4-(hex-1-en-1-yl)-1,1'-biphenyl (7e).** The reaction was carried out according to the typical procedure by using **6e** (56 mg, 0.20 mmol). Purification by silica gel chromatography (hexane as eluent) afforded the title compound as a yellow oil (43 mg, 91%, *Z/E* = 94:6).  $^1\text{H}$  NMR (400 MHz,  $\text{CDCl}_3$ )  $\delta$  7.68 – 7.56 (m, 4H), 7.50 – 7.33 (m, 5H), 6.46 (d,  $J$  = 11.6 Hz, 1H), 5.73 (dt,  $J$  = 11.5, 7.2 Hz, 1H), 2.42 (q,  $J$  = 7.4 Hz, 2H), 1.55 – 1.45 (m, 2H), 1.44 – 1.34 (m, 2H), 0.94 (t,  $J$  = 7.2 Hz, 3H).  $^{13}\text{C}$  NMR (101 MHz,  $\text{CDCl}_3$ )  $\delta$  141.0, 139.3, 137.0, 133.7, 129.3, 128.9, 128.4, 127.3, 127.1, 126.9, 32.3, 28.7, 22.6, 14.2. HRMS-EI ( $m/z$ ): Calcd for  $[\text{C}_{18}\text{H}_{20}]^+$ , 236.1565; found: 236.1559.

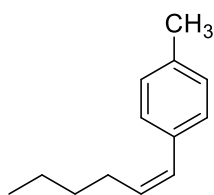

**(Z)-1-(hex-1-en-1-yl)-4-methylbenzene (7f).** The reaction was carried out according to the typical procedure by using **6f** (44 mg, 0.20 mmol). Purification by silica gel chromatography (hexane as eluent) afforded the title compound as a pale yellow oil (27 mg, 78%, *Z/E* = 97:3). <sup>1</sup>H NMR (400 MHz, CDCl<sub>3</sub>) δ 7.20 (d, *J* = 7.9 Hz, 2H), 7.15 (d, *J* = 7.9 Hz, 2H), 6.38 (d, *J* = 11.6 Hz, 1H), 5.63 (dt, *J* = 11.5, 7.2 Hz, 1H), 2.36 (s, 3H), 1.49 – 1.33 (m, 4H), 0.91 (t, *J* = 7.1 Hz, 3H). <sup>13</sup>C NMR (101 MHz, CDCl<sub>3</sub>) δ 136.2, 135.1, 132.7, 128.9, 128.8, 128.6, 32.4, 28.6, 22.6, 21.3, 14.2. HRMS-EI (*m/z*): Calcd for [C<sub>13</sub>H<sub>18</sub>]<sup>+</sup>, 174.1409; found: 174.1402.

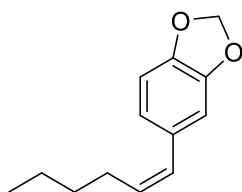

**(Z)-5-(hex-1-en-1-yl)benzo[d][1,3]dioxole (7g).** The reaction was carried out according to the typical procedure by using **6g** (50 mg, 0.20 mmol). Purification by silica gel chromatography (petroleum ether/ethyl acetate = 50/1 as eluent) afforded the title compound as a yellow oil (34 mg, 83%, *Z/E* = 93:7). <sup>1</sup>H NMR (400 MHz, CDCl<sub>3</sub>) δ 6.84 – 6.71 (m, 3H), 6.30 (d, *J* = 11.7 Hz, 1H), 5.95 (s, 2H), 5.57 (dt, *J* = 11.6, 7.2 Hz, 1H), 2.31 (q, *J* = 7.1 Hz, 2H), 1.47 – 1.32 (m, 4H), 0.90 (t, *J* = 7.1 Hz, 3H). <sup>13</sup>C NMR (101 MHz, CDCl<sub>3</sub>) δ 147.5, 146.1, 132.3, 132.1, 128.3, 122.6, 109.1, 108.2, 101.0, 32.3, 28.5, 22.6, 14.1. HRMS-EI (*m/z*): Calcd for [C<sub>13</sub>H<sub>16</sub>O<sub>2</sub>]<sup>+</sup>, 204.1150; found: 204.1153.

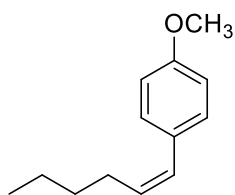

**(Z)-1-(hex-1-en-1-yl)-4-methoxybenzene (7h).** The reaction was carried out according to the typical procedure by using **6h** (47 mg, 0.20 mmol). Purification by silica gel chromatography (petroleum ether/ethyl acetate = 50/1 as eluent) afforded the title compound as a yellow oil (32 mg, 84%, *Z/E* = 97:3). <sup>1</sup>H NMR (400 MHz, CDCl<sub>3</sub>) δ 7.24 (d, *J* = 8.4 Hz, 2H), 6.88 (d, *J* = 8.4 Hz, 2H), 6.35 (d, *J* = 11.6 Hz, 1H), 5.59 (dt, *J* = 11.6, 7.2 Hz, 1H), 3.82 (s, 3H), 2.34 (q, *J* = 7.1 Hz, 2H), 1.47 – 1.33 (m, 4H), 0.91 (t, *J* = 7.2 Hz, 3H). <sup>13</sup>C NMR (101 MHz, CDCl<sub>3</sub>) δ 158.2, 131.8, 130.6, 130.0, 128.2, 113.6, 55.4, 32.4, 28.5, 22.6, 14.2. HRMS-EI (*m/z*): Calcd for [C<sub>13</sub>H<sub>18</sub>O<sup>+</sup>], 190.1358; found: 190.1356.

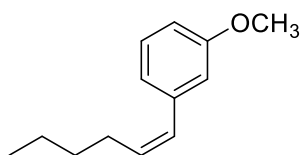

**(Z)-1-(hex-1-en-1-yl)-3-methoxybenzene (7i).** The reaction was carried out according to the typical procedure by using **6i** (47 mg, 1.00 mmol). Purification by silica gel chromatography (petroleum ether/ethyl acetate = 50/1 as eluent) afforded the title compound as a yellow oil (26 mg, 70%, *Z/E* = 88:12). <sup>1</sup>H NMR (400 MHz, CDCl<sub>3</sub>) δ 7.28 (t, *J* = 7.9 Hz, 1H), 6.91 (d, *J* = 7.6 Hz, 1H), 6.86 (s, 1H), 6.81 (d, *J* = 8.2 Hz, 1H), 6.41 (d, *J* = 11.6 Hz, 1H), 5.70 (dt, *J* = 11.7, 7.3 Hz, 1H), 3.84 (s, 3H), 2.37 (q, *J* = 7.8, 7.4 Hz, 2H), 1.51 – 1.36 (m, 4H), 0.93 (t, *J* = 7.2 Hz, 3H). <sup>13</sup>C NMR (101 MHz, CDCl<sub>3</sub>) δ 159.5, 139.3, 133.7, 129.2, 128.7, 121.5, 114.4, 112.0, 55.3, 32.3, 28.6, 22.6, 14.2. HRMS-EI (*m/z*): Calcd for [C<sub>13</sub>H<sub>18</sub>O<sup>+</sup>], 190.1358; found: 190.1354.

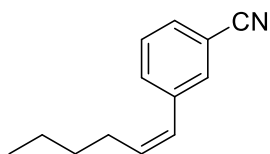

**(Z)-3-(hex-1-en-1-yl)benzonitrile (7j).** The reaction was carried out according to the typical procedure by using **6j** (37 mg, 0.20 mmol). Purification by silica gel chromatography (petroleum ether/ethyl acetate = 50/1 as eluent) afforded the title compound as a yellow oil (21 mg, 55%, *Z/E* = 91:9). <sup>1</sup>H NMR (400 MHz, CDCl<sub>3</sub>) δ 7.59 – 7.36 (m, 4H), 6.36 (d, *J* = 11.7 Hz, 1H), 5.79 (dt, *J* = 11.6, 7.3 Hz, 1H), 2.28 (q, *J* = 6.9 Hz, 2H), 1.46 – 1.31 (m, 4H), 0.90 (t, *J* = 7.1 Hz, 3H). <sup>13</sup>C NMR (101 MHz, CDCl<sub>3</sub>) δ 139.0, 135.9, 133.2, 132.2, 130.0, 129.1, 126.7, 119.1, 112.4, 32.0, 28.4, 22.5, 14.0. HRMS-EI (*m/z*): Calcd for [C<sub>13</sub>H<sub>15</sub>N<sup>+</sup>], 185.1204; found: 185.1211.

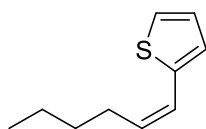

**(Z)-2-(hex-1-en-1-yl)thiophene (7k).** The reaction was carried out according to the typical procedure by using **6k** (42 mg, 0.20 mmol). Purification by silica gel chromatography (hexane as eluent) afforded the title compound as a colorless oil (22 mg, 66%, *Z/E* = 90:10). <sup>1</sup>H NMR (400 MHz, CDCl<sub>3</sub>) δ 7.25 (d, *J* = 5.4 Hz, 1H), 7.03 – 6.96 (m, 2H), 6.54 (d, *J* = 11.6 Hz, 1H), 5.59 (dt, *J* = 11.6, 7.2 Hz, 1H), 2.42 (q, *J* = 7.1 Hz, 2H), 1.55 – 1.46 (m, 2H), 1.45 – 1.36 (m, 2H), 0.94 (t, *J* = 7.2 Hz, 3H). <sup>13</sup>C NMR (101 MHz, CDCl<sub>3</sub>) δ 141.0, 131.4, 127.1, 126.8, 125.0, 121.8, 31.8, 29.2, 22.6, 14.1. HRMS-EI (*m/z*): Calcd for [C<sub>10</sub>H<sub>14</sub>S<sup>+</sup>], 166.0816; found: 166.0812.

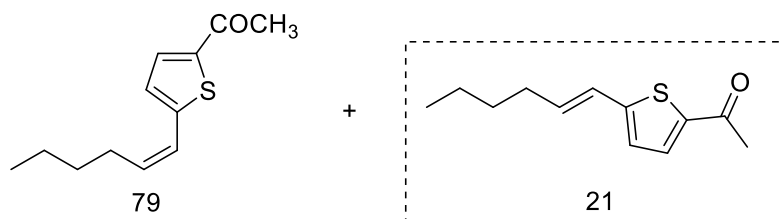

**(Z)-1-(5-(hex-1-en-1-yl)thiophen-2-yl)ethan-1-one (7l).** The reaction was carried

out according to the typical procedure by using **6l** (51 mg, 0.20 mmol). Purification by silica gel chromatography (petroleum ether/ethyl acetate = 50/1 as eluent) afforded a mixture of Z and E isomer as a yellow oil (26 mg, 64%, *Z/E* = 79:21). <sup>1</sup>H NMR (400 MHz, CDCl<sub>3</sub>) δ 7.58 (d, *J* = 3.4 Hz, 0.79H, Z isomer), 7.52 (d, *J* = 3.5 Hz, 0.21H, E isomer), 6.95 (d, *J* = 3.6 Hz, 79%, 1H, Z isomer), 6.86 (d, *J* = 3.3 Hz, 21%, 1H, E isomer), 6.51 (d, *J* = 12.4 Hz, 79%, 1H, Z isomer), 6.34 – 6.22 (m, 21%, 1H, E isomer), 5.78 (dt, *J* = 11.6, 7.3 Hz, 0.79%, 1H, Z isomer), 2.54 (s, 79%, 3H, Z isomer), 2.50 (s, 21%, 3H, E isomer), 2.44 (q, *J* = 7.1 Hz, 79%, 2H, Z isomer), 2.20 (d, *J* = 7.2 Hz, 21%, 2H, E isomer), 1.53 – 1.34 (m, 4H), 0.97 – 0.88 (m, 3H). HRMS-EI (*m/z*): Calcd for [C<sub>12</sub>H<sub>16</sub>OS<sup>+</sup>], 208.0922; found: 208.0924.

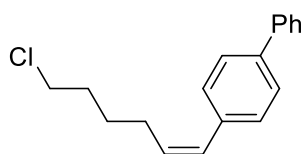

**(Z)-4-(6-chlorohex-1-en-1-yl)-1,1'-biphenyl (7m).** The reaction was carried out according to the typical procedure by using **4g** (36 mg, 0.12 mmol) and **6e** (28 mg, 0.10 mmol). Purification by silica gel chromatography (petroleum ether/ethyl acetate = 100/1 as eluent) afforded the title compound as a colorless oil (26 mg, 96%, *Z/E* = 94:6). <sup>1</sup>H NMR (400 MHz, CDCl<sub>3</sub>) δ 7.64 – 7.57 (m, 4H), 7.45 (t, *J* = 7.6 Hz, 2H), 7.39 – 7.33 (m, 3H), 6.49 (d, *J* = 11.7 Hz, 1H), 5.68 (dt, *J* = 11.7, 7.2 Hz, 1H), 3.55 (t, *J* = 6.6 Hz, 2H), 2.43 (qd, *J* = 7.4, 1.8 Hz, 2H), 1.88 – 1.80 (m, 2H), 1.69 – 1.60 (m, 2H). <sup>13</sup>C NMR (101 MHz, CDCl<sub>3</sub>) δ 140.9, 139.5, 136.7, 132.5, 129.3, 129.1, 128.9, 127.4, 127.1, 127.0, 45.0, 32.3, 28.0, 27.3. HRMS-EI (*m/z*): Calcd for [C<sub>18</sub>H<sub>19</sub>Cl<sup>+</sup>], 270.1175; found: 270.1174.

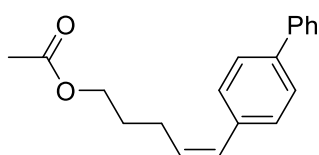

---

**(Z)-5-([1,1'-biphenyl]-4-yl)pent-4-en-1-yl acetate (7n).** The reaction was carried out according to the typical procedure by using **4o** (31 mg, 0.12 mmol) and **6e** (28 mg, 0.10 mmol). Purification by silica gel chromatography (petroleum ether/ethyl acetate = 50/1 as eluent) afforded the title compound as a colorless oil (26 mg, 94%, *Z/E* = 98:2). <sup>1</sup>H NMR (400 MHz, CDCl<sub>3</sub>) δ 7.59 (dd, *J* = 13.5, 8.0 Hz, 4H), 7.45 (t, *J* = 7.6 Hz, 2H), 7.35 (d, *J* = 8.1 Hz, 3H), 6.49 (d, *J* = 11.7 Hz, 1H), 5.67 (dt, *J* = 11.7, 7.3 Hz, 1H), 3.65 (s, 3H), 2.43 (q, *J* = 7.5 Hz, 2H), 2.37 (t, *J* = 7.5 Hz, 2H), 1.82 (p, *J* = 7.5 Hz, 2H). <sup>13</sup>C NMR (101 MHz, CDCl<sub>3</sub>) δ 174.1, 140.9, 139.5, 136.6, 132.0, 129.5, 129.3, 128.9, 127.4, 127.1, 127.0, 51.7, 33.7, 28.2, 25.3. HRMS-EI (*m/z*): Calcd for [C<sub>19</sub>H<sub>20</sub>O<sub>2</sub>], 280.1463; found: 280.1458.



---

## 5. References

- [1] X. Du, Y. Zhang, D. Peng, Z. Huang, *Angew. Chem. Int. Ed.* **2016**, *55*, 6671-6675.
- [2] L. Cleary, H. Yoo, K. J. Shea, *Org. Lett.* **2011**, *13*, 1781-1783.
- [3] R. G. Iafe, D. G. Chan, J. L. Kuo, B. A. Boon, D. J. Faizi, T. Saga, J. W. Turner, C. A. Merlic, *Org. Lett.* **2012**, *14*, 4282-4285.
- [4] Z. Mo, J. Xiao, Y. Gao, L. Deng, *J. Am. Chem. Soc.* **2014**, *136*, 17414-17417.
- [5] J. Guo, Z. Lu, *Angew. Chem. Int. Ed.* **2016**, *55*, 10835-10838.

## 6. NMR Spectra

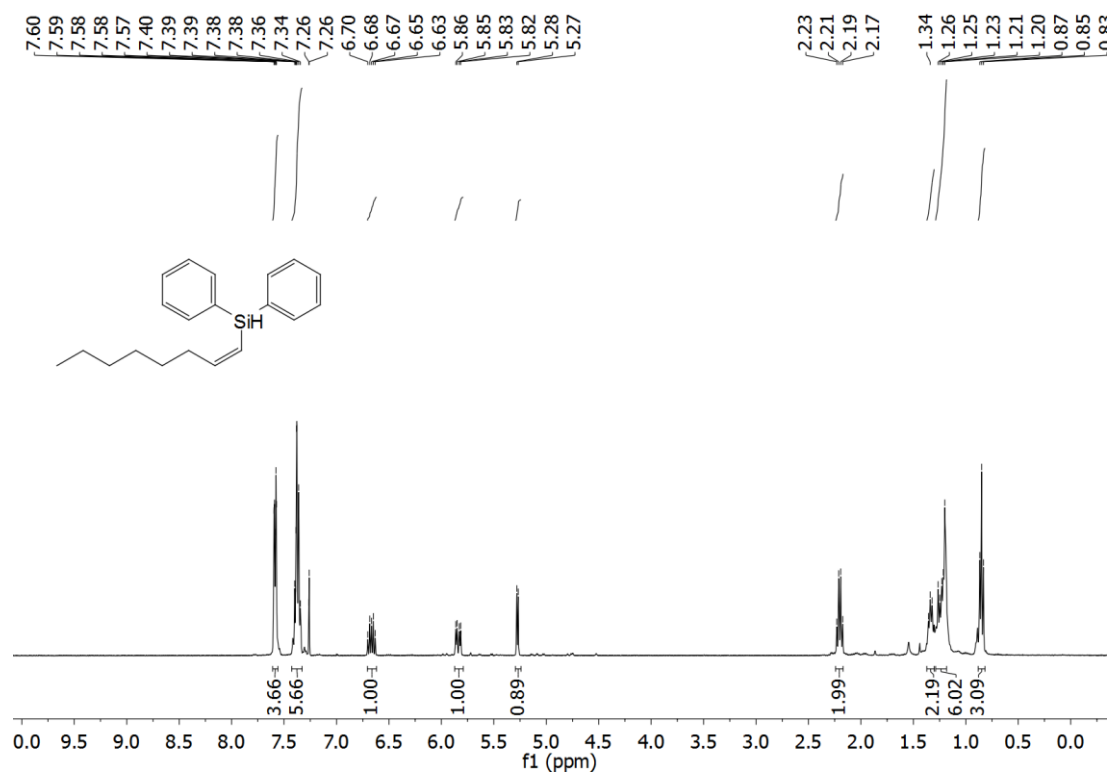

<sup>1</sup>H NMR (400 MHz, CDCl<sub>3</sub>) of **4a**

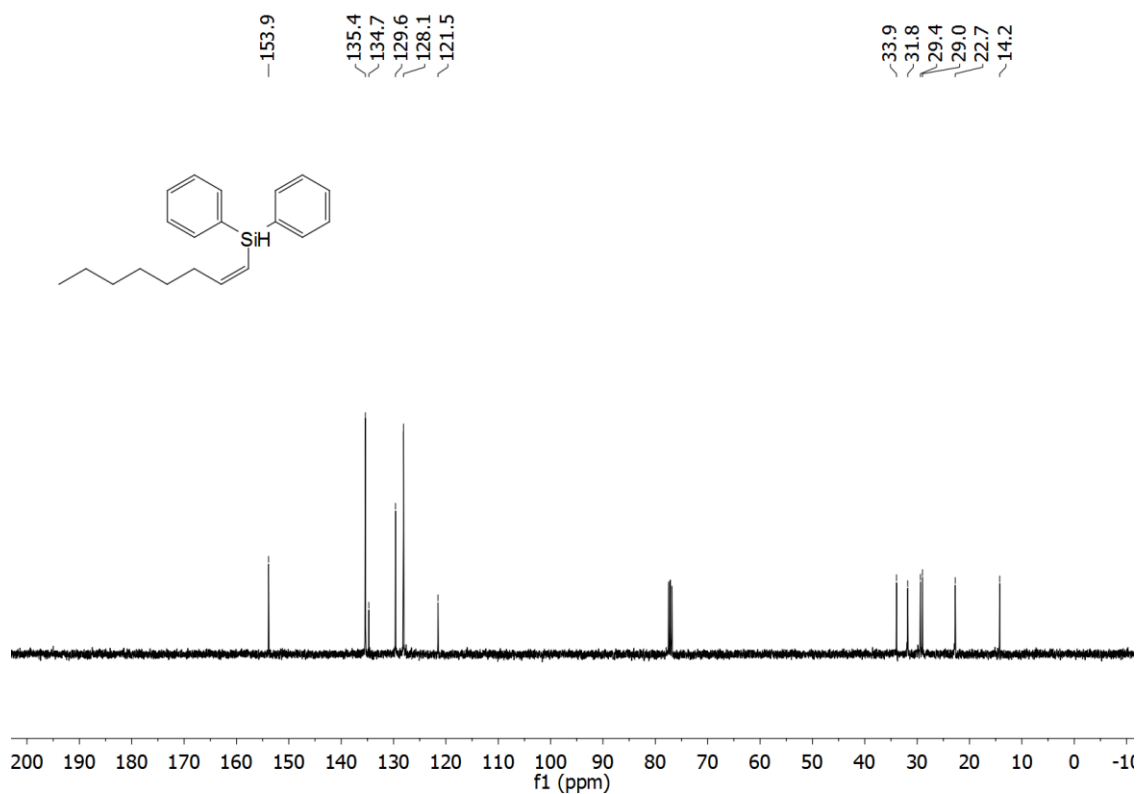

<sup>13</sup>C NMR (101 MHz, CDCl<sub>3</sub>) of **4a**

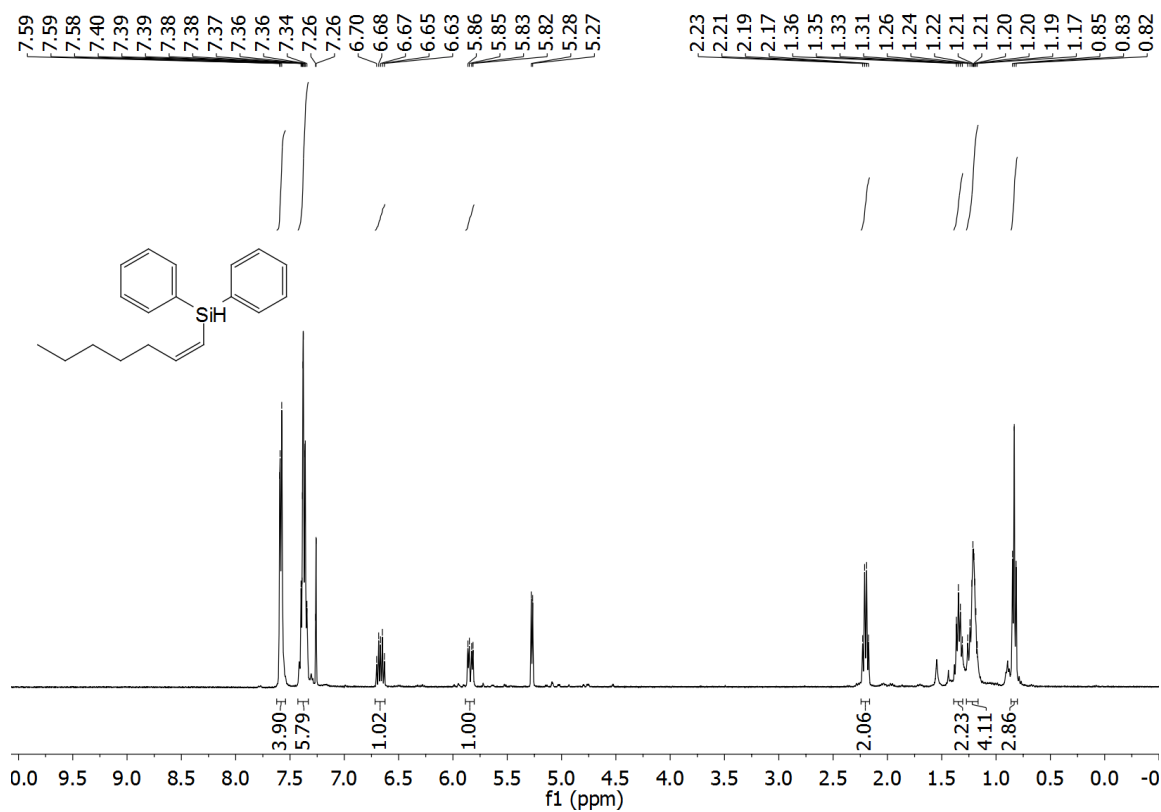

<sup>1</sup>H NMR (400 MHz, CDCl<sub>3</sub>) of **4b**

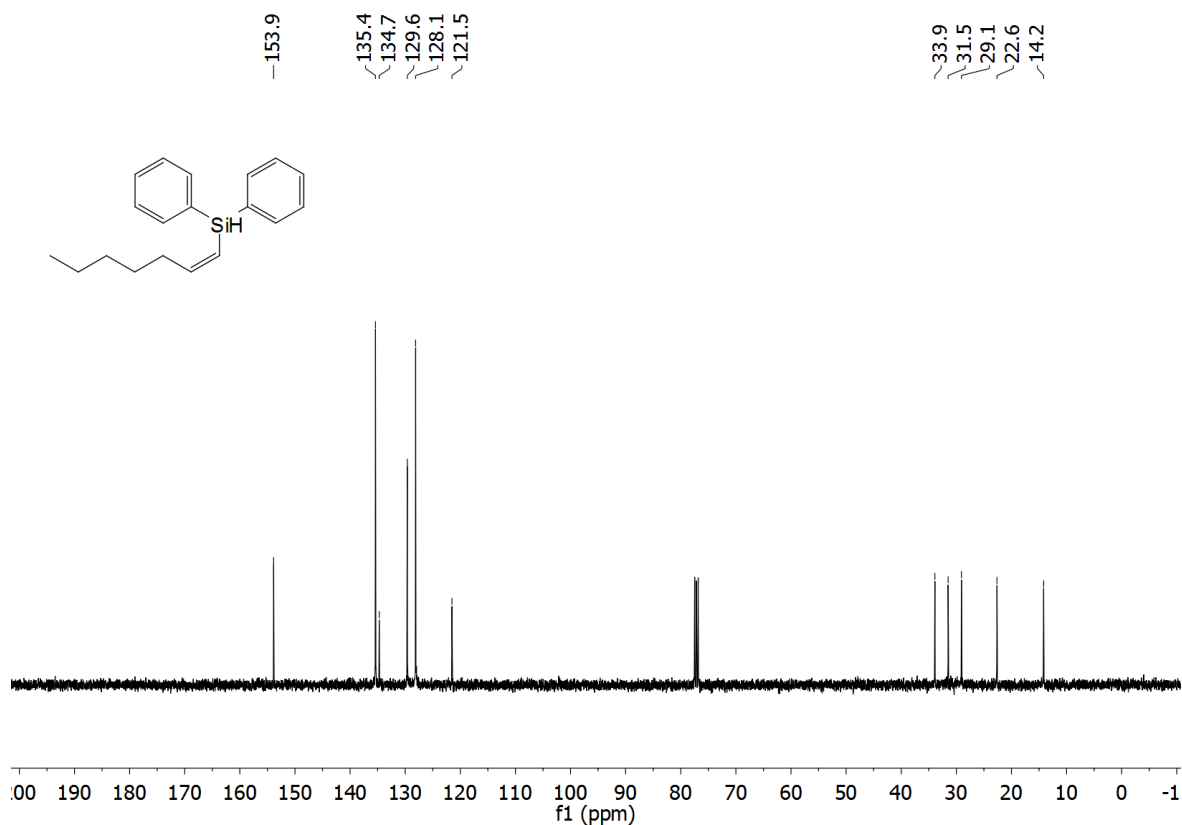

<sup>13</sup>C NMR (101 MHz, CDCl<sub>3</sub>) of **4b**

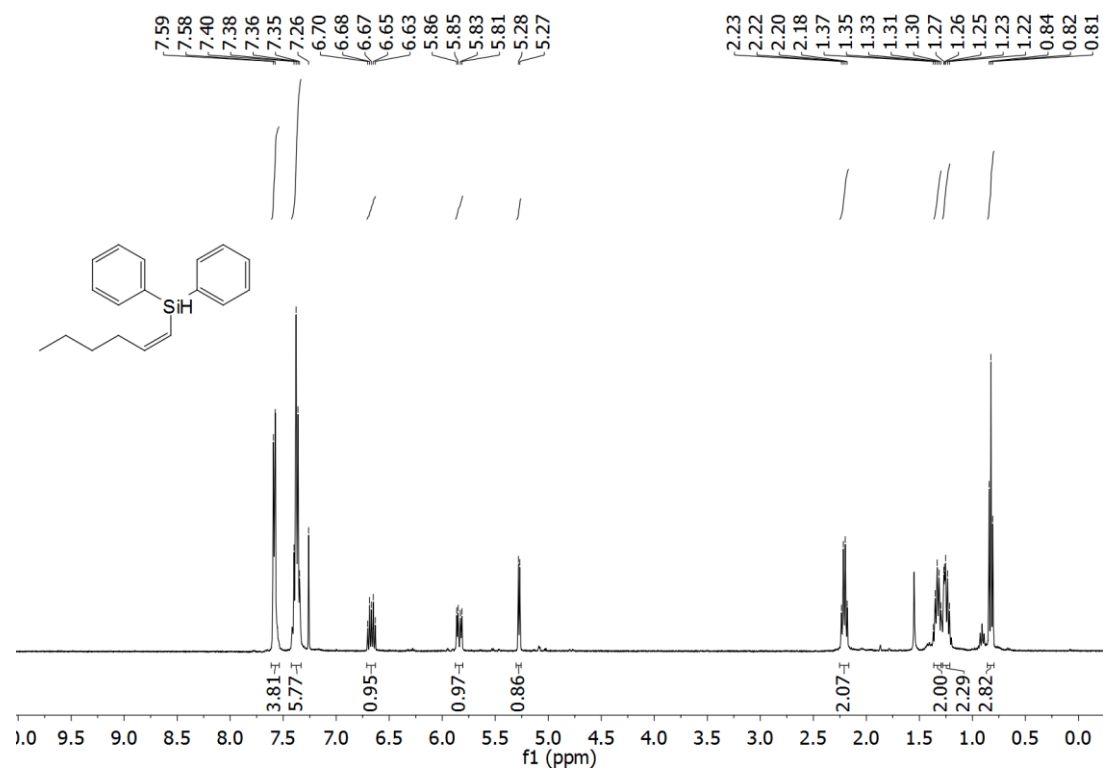

<sup>1</sup>H NMR (500 MHz, CDCl<sub>3</sub>) of **4c**

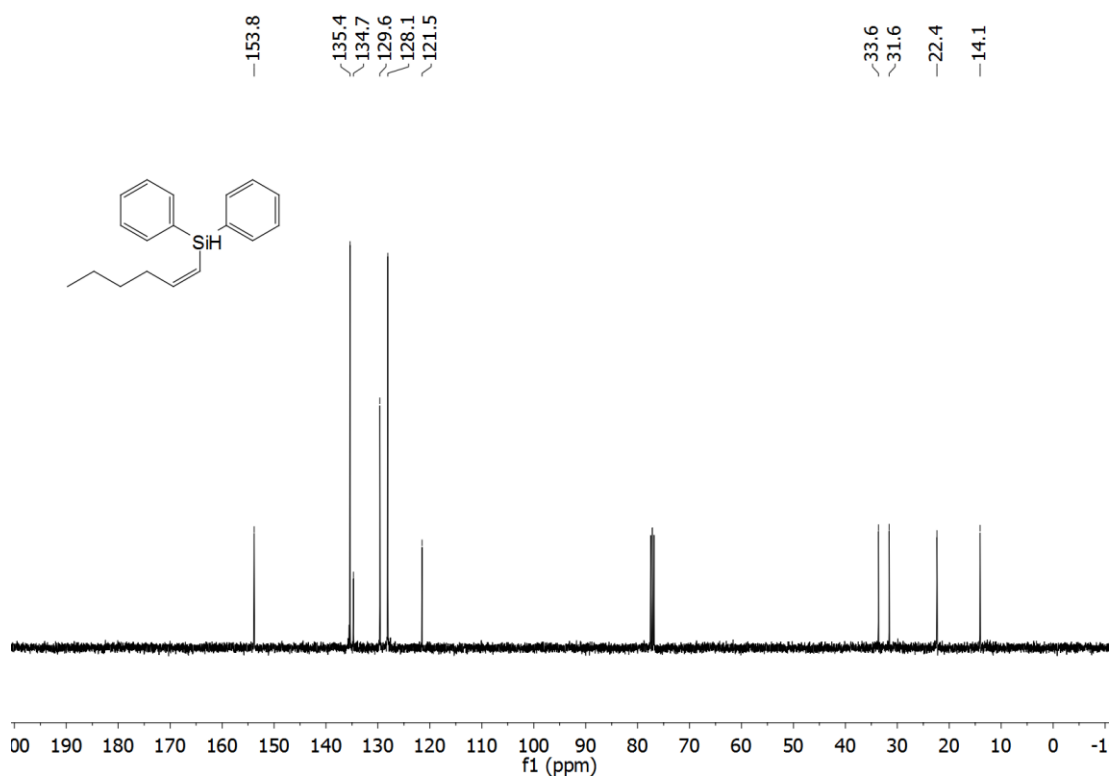

<sup>13</sup>C NMR (101 MHz, CDCl<sub>3</sub>) of **4c**

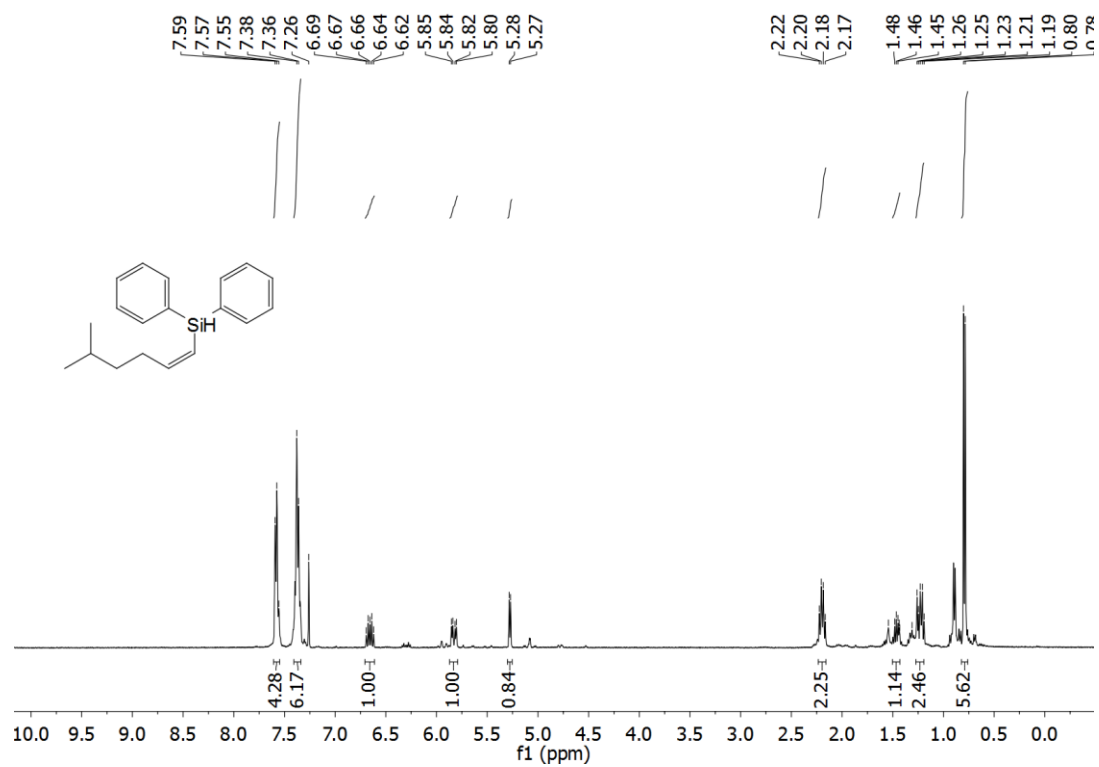

<sup>1</sup>H NMR (400 MHz, CDCl<sub>3</sub>) of **4d**

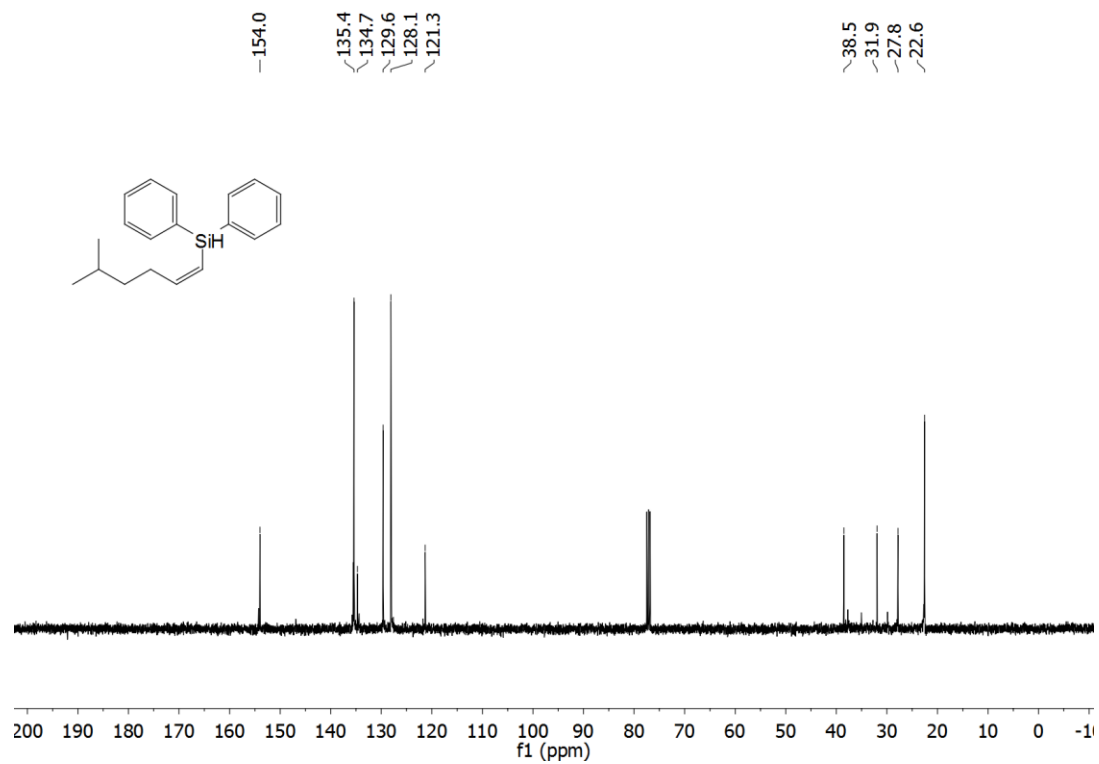

<sup>13</sup>C NMR (101 MHz, CDCl<sub>3</sub>) of **4d**

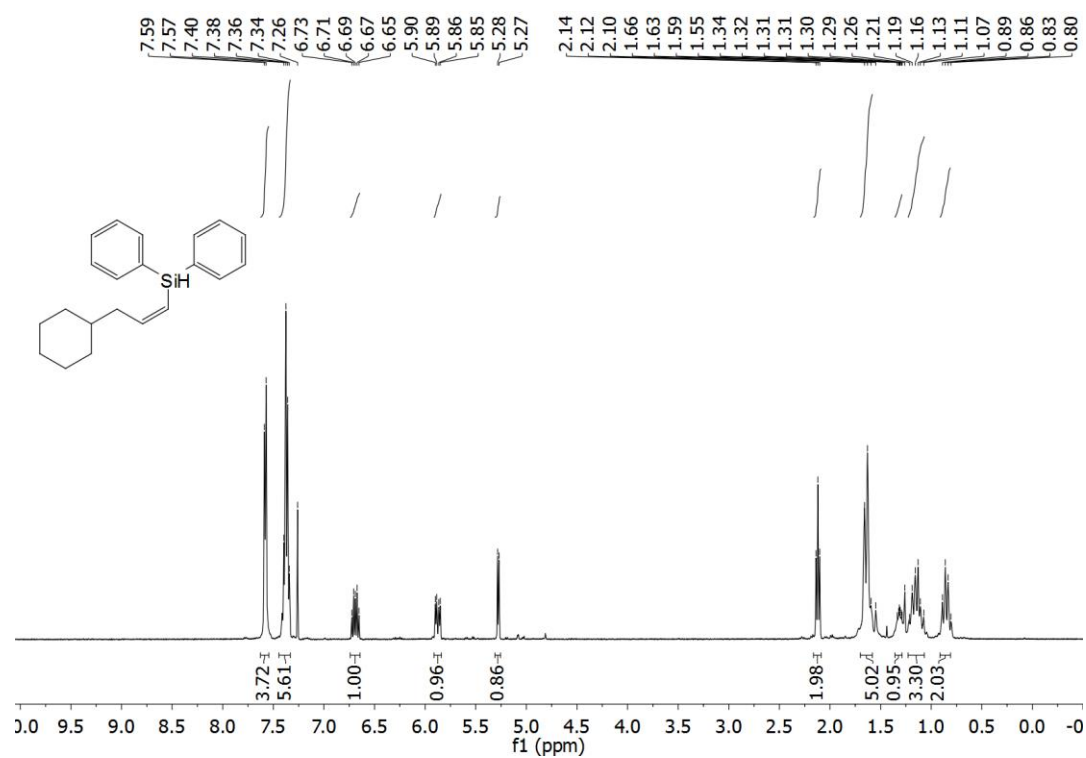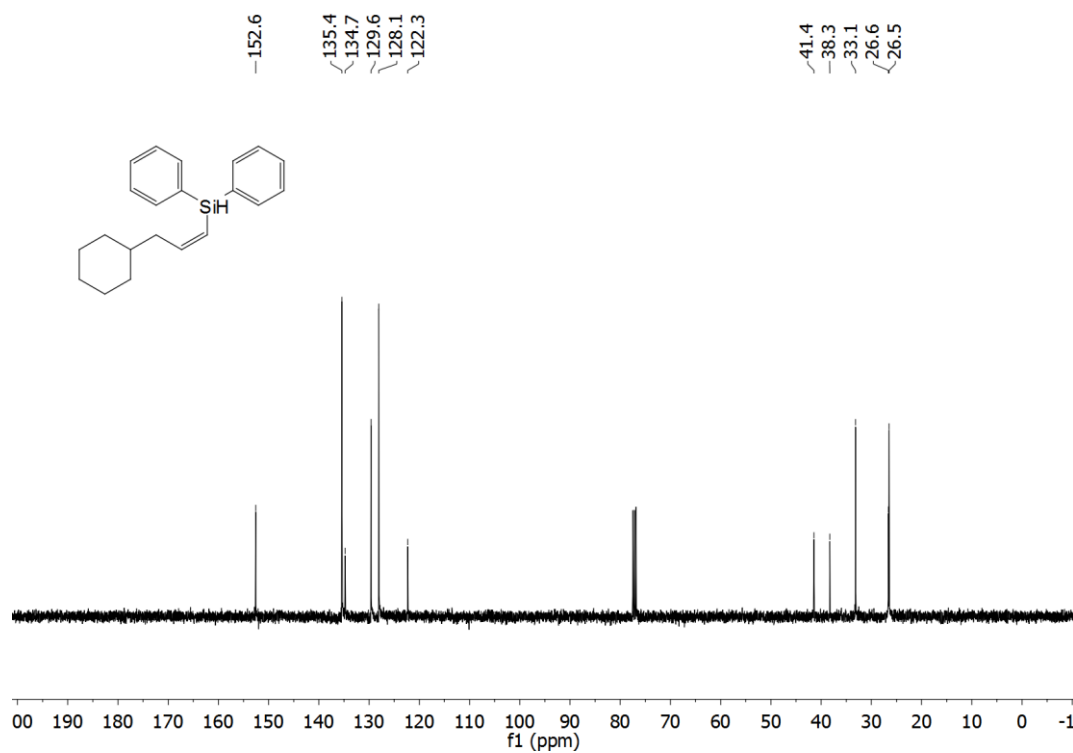

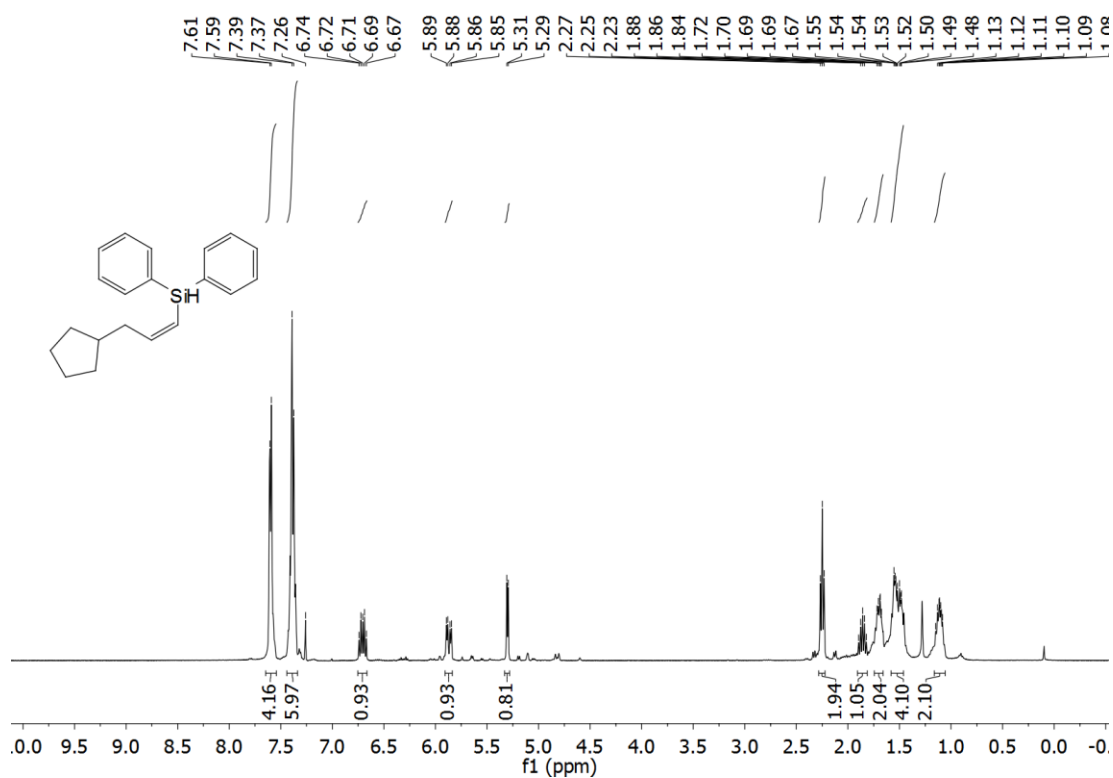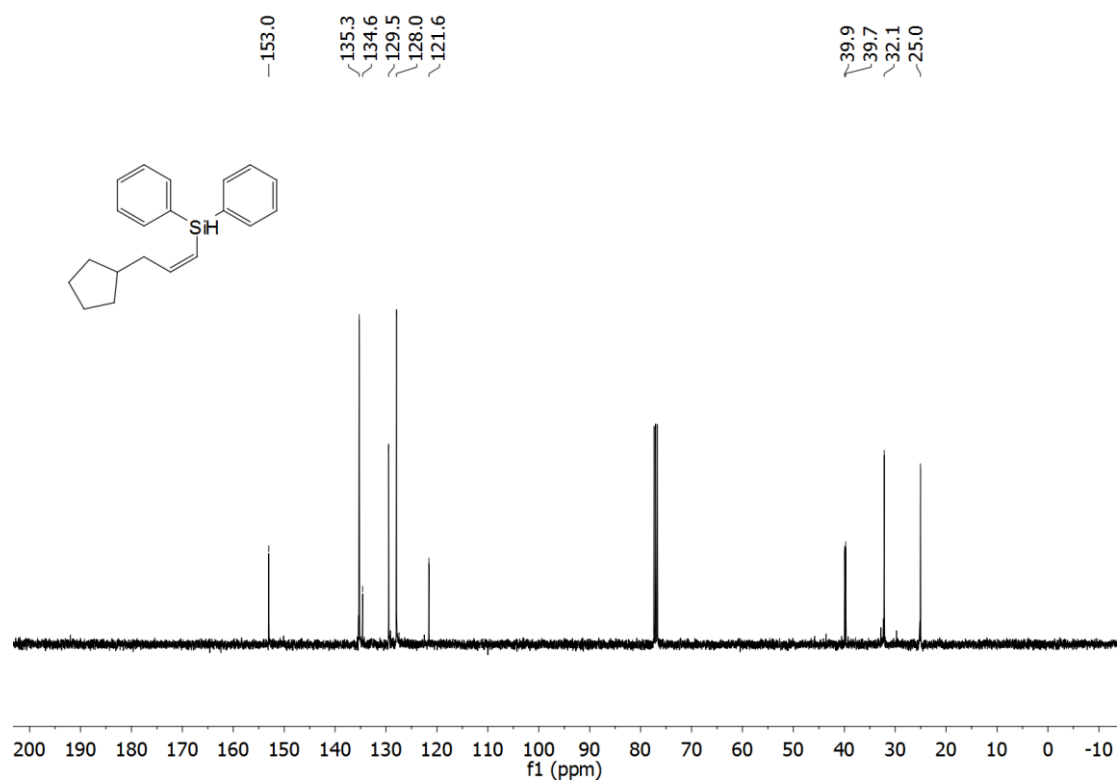

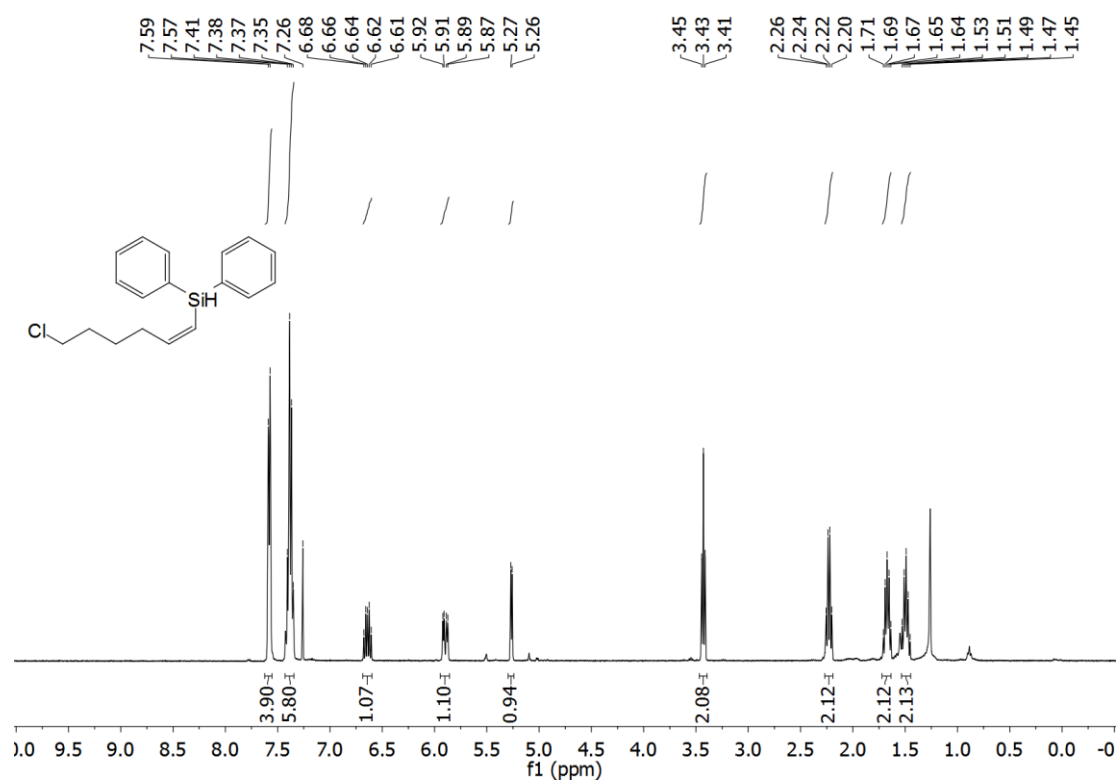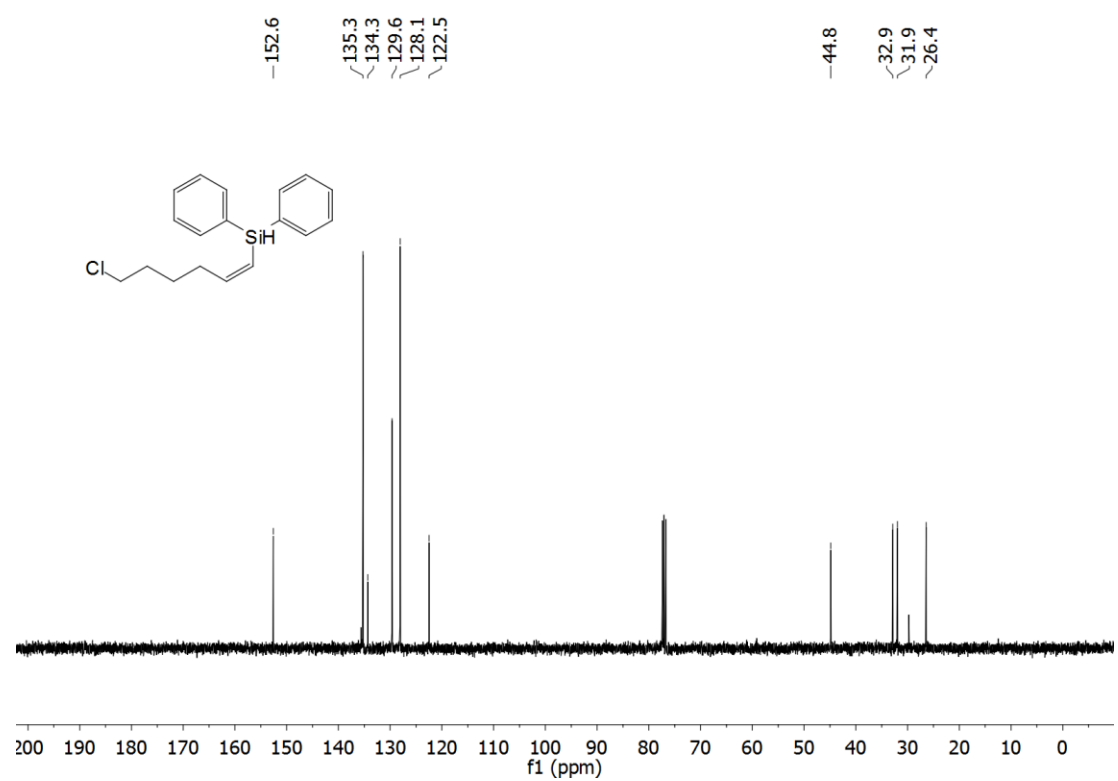



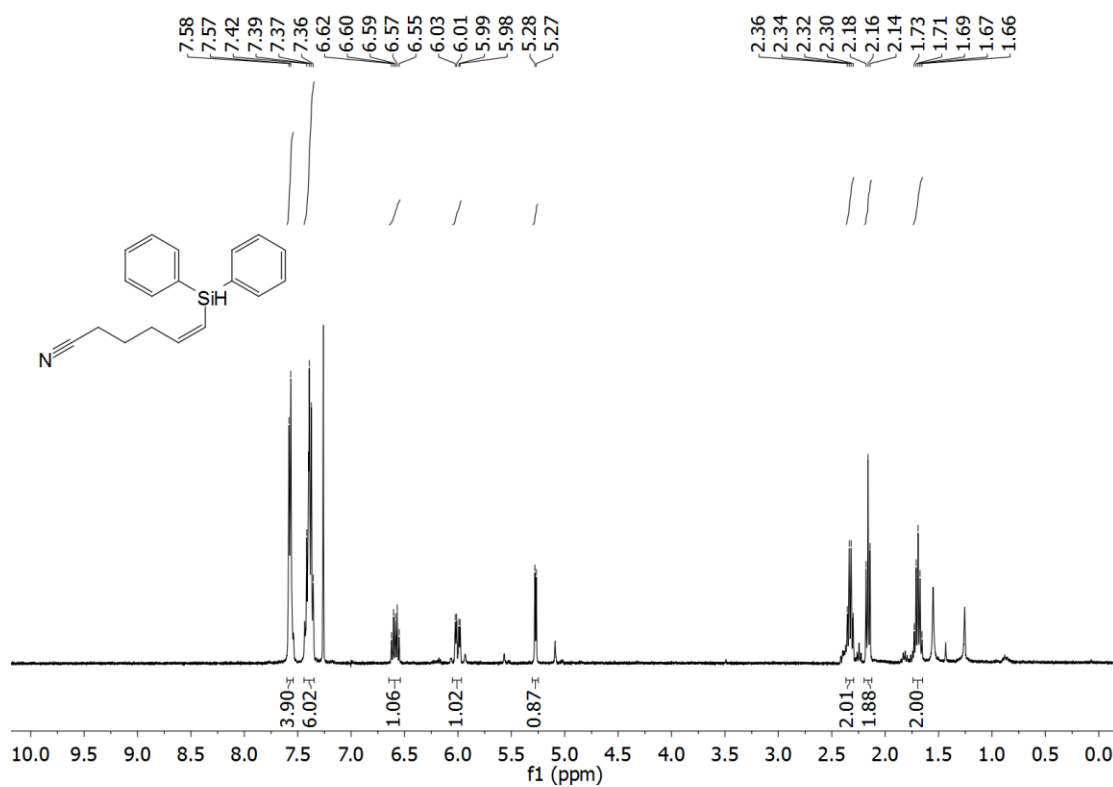

<sup>1</sup>H NMR (400 MHz, CDCl<sub>3</sub>) of **4h**

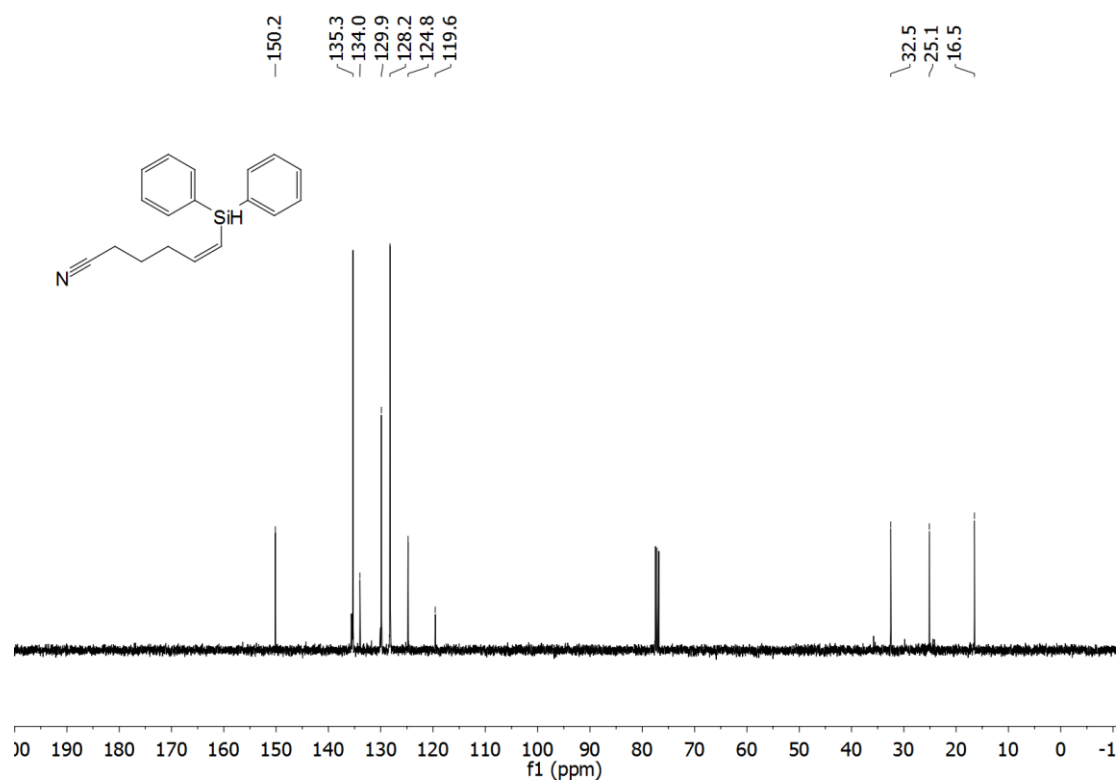

<sup>13</sup>C NMR (101 MHz, CDCl<sub>3</sub>) of **4h**

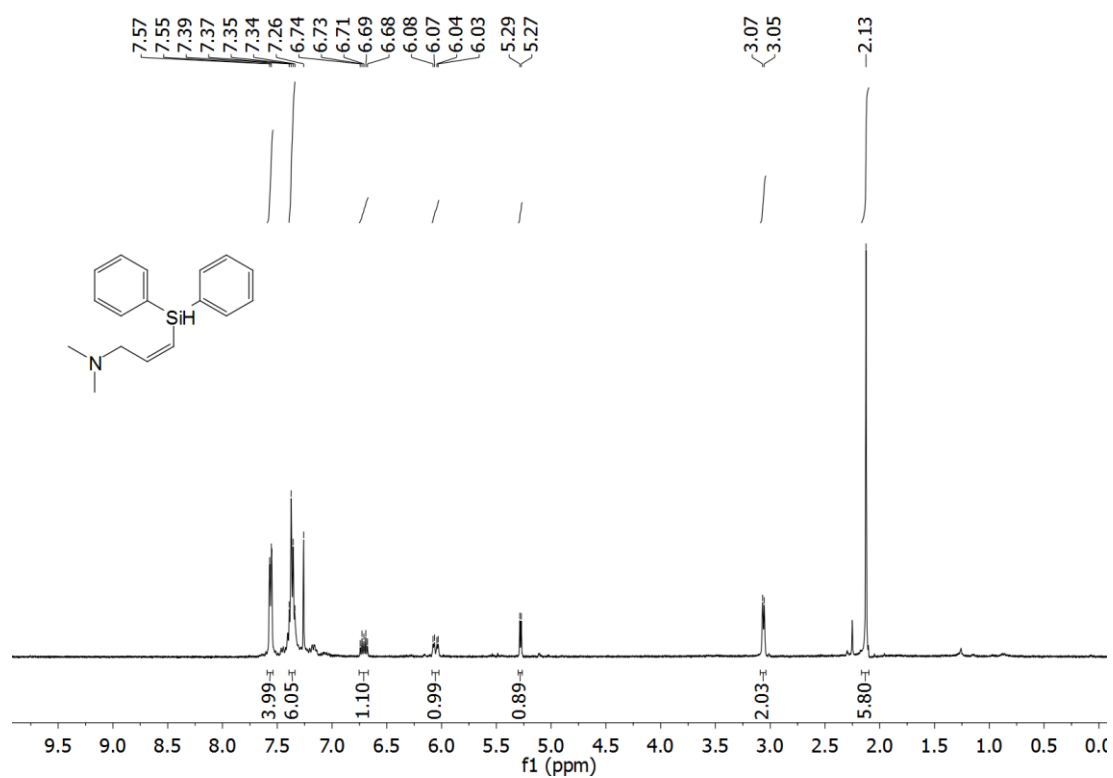

<sup>1</sup>H NMR (400 MHz, CDCl<sub>3</sub>) of **4i**

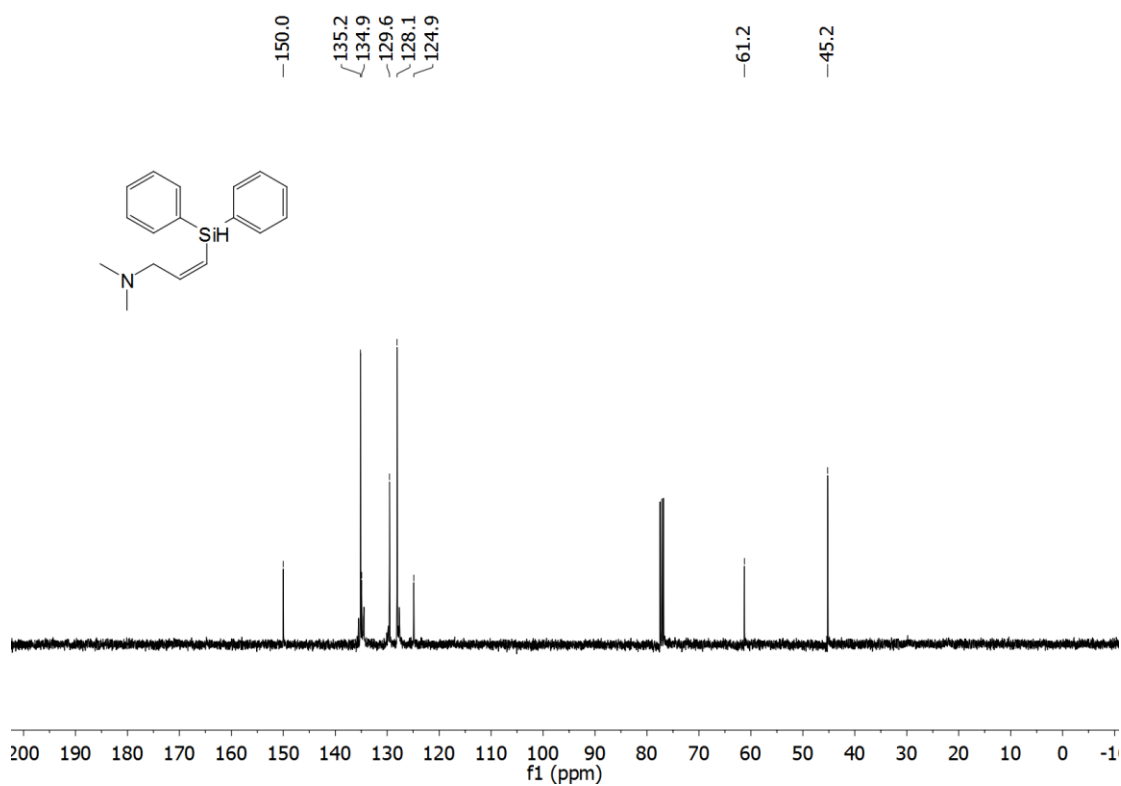

<sup>13</sup>C NMR (101 MHz, CDCl<sub>3</sub>) of **4i**

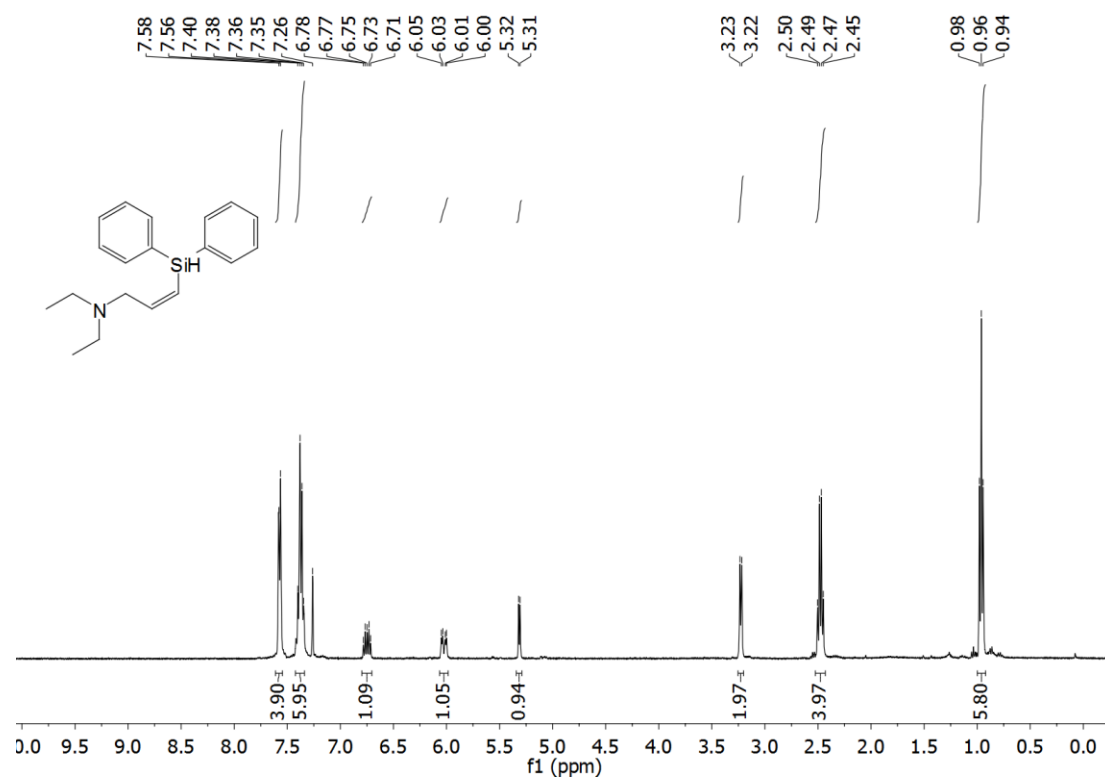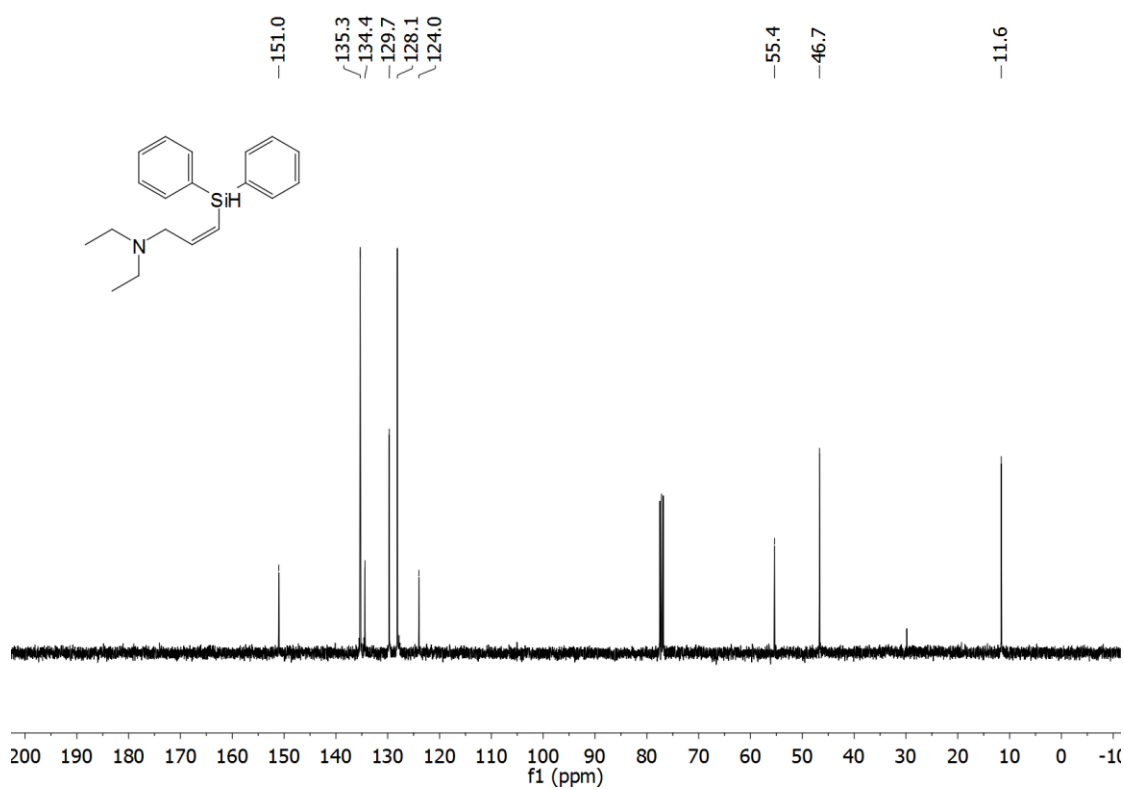

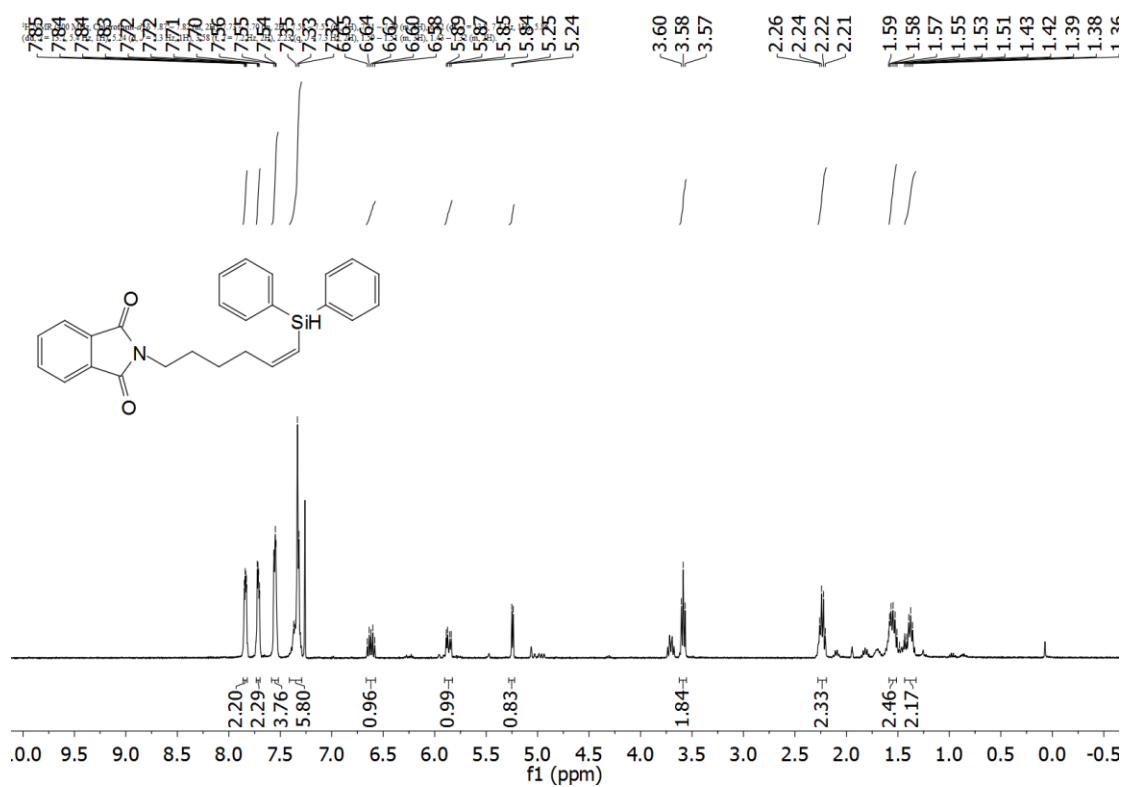

<sup>1</sup>H NMR (400 MHz, CDCl<sub>3</sub>) of **4k**

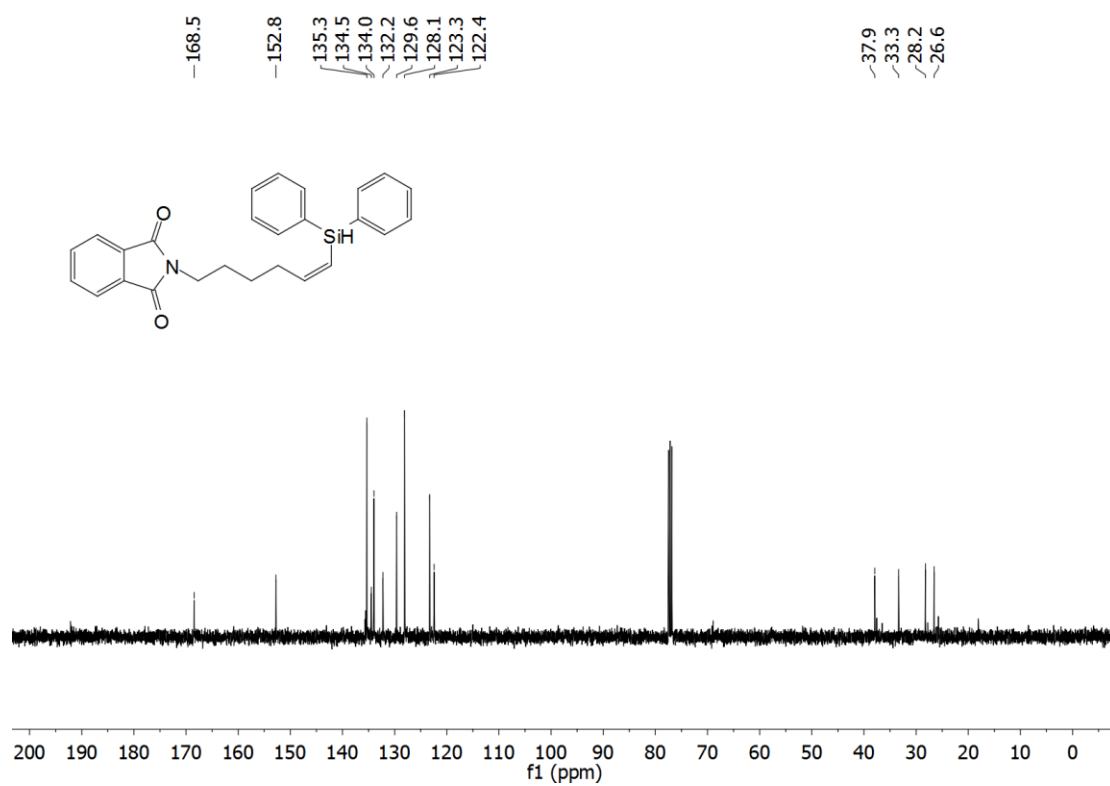

<sup>13</sup>C NMR (101 MHz, CDCl<sub>3</sub>) of **4k**

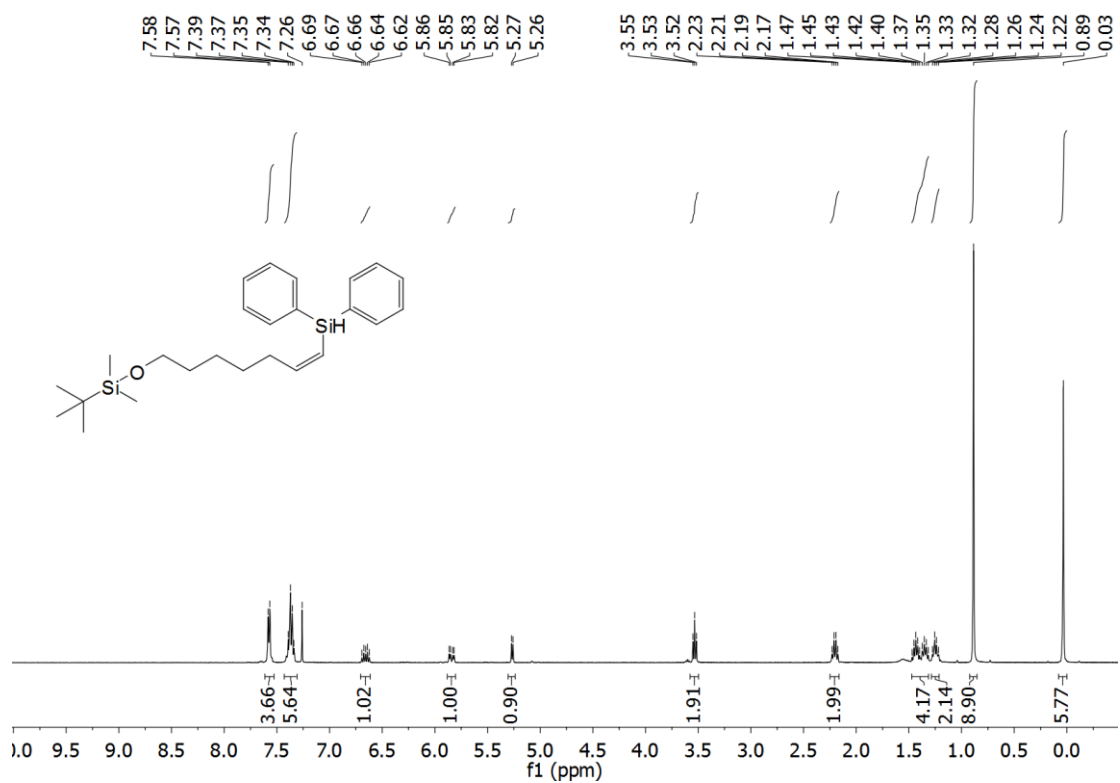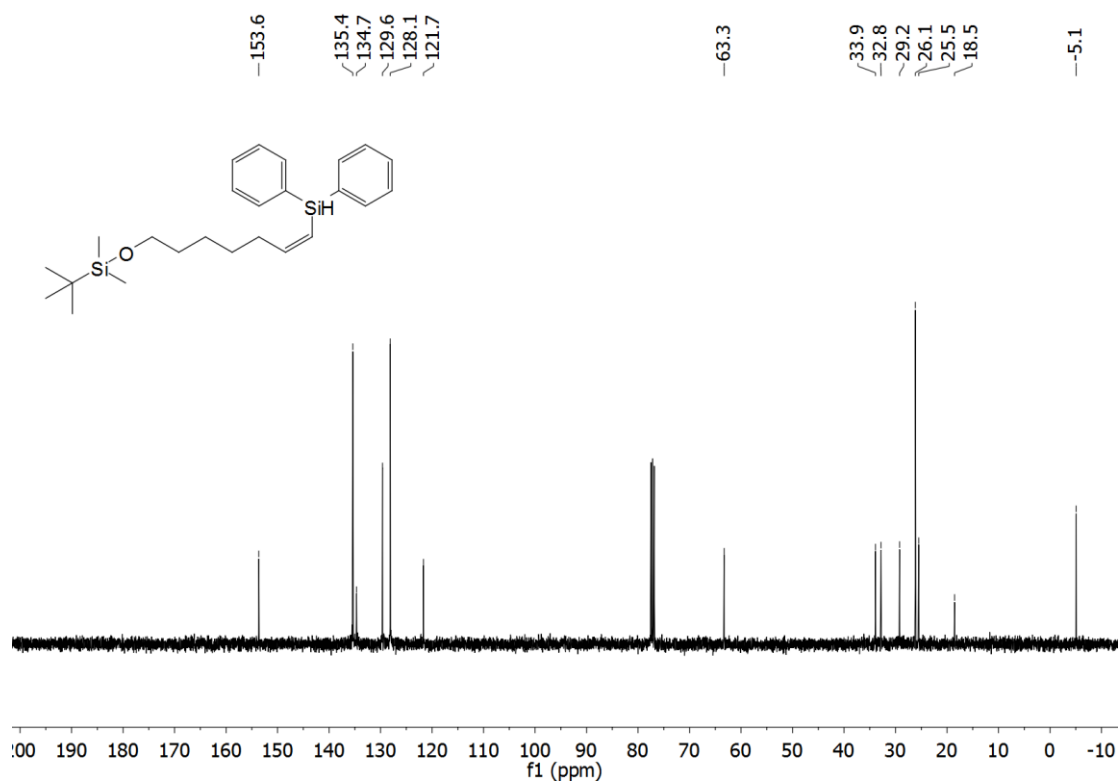

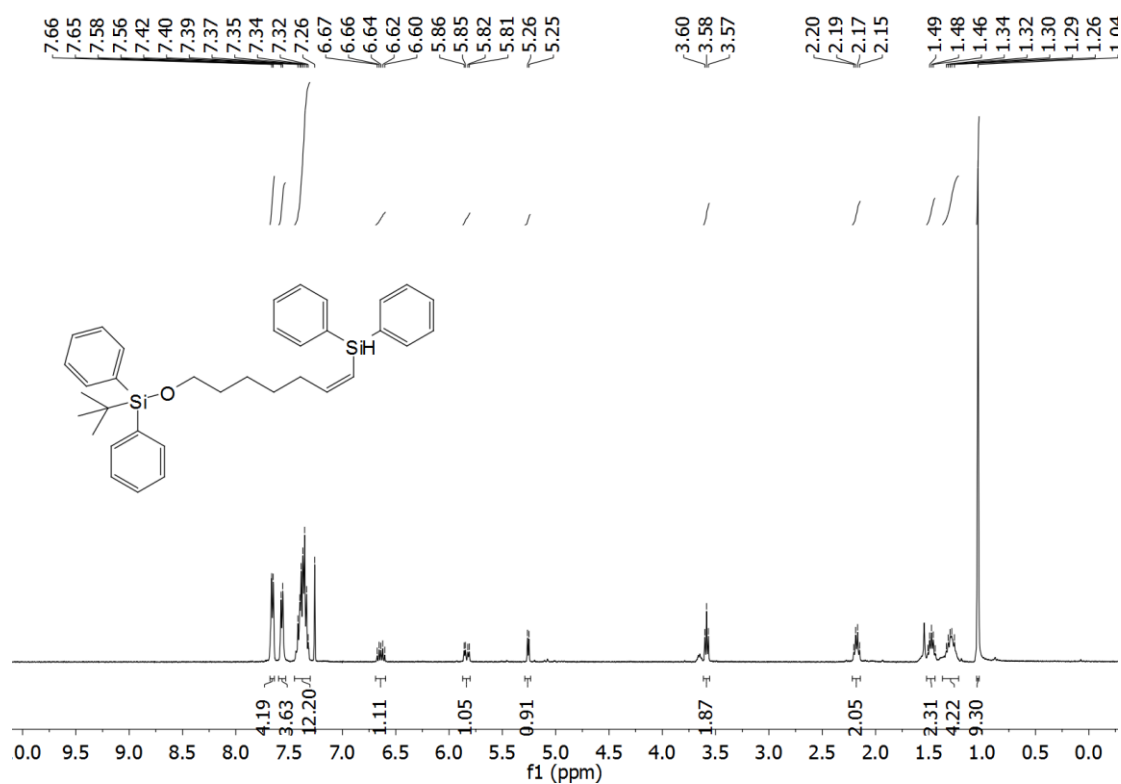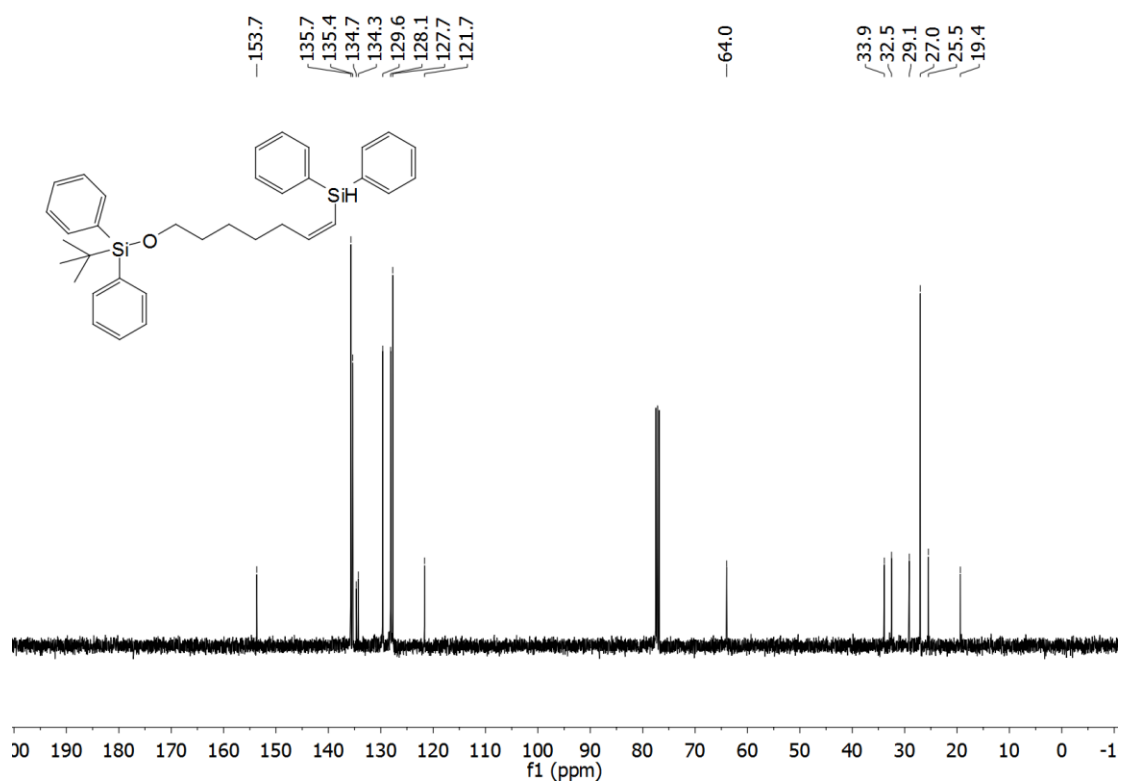

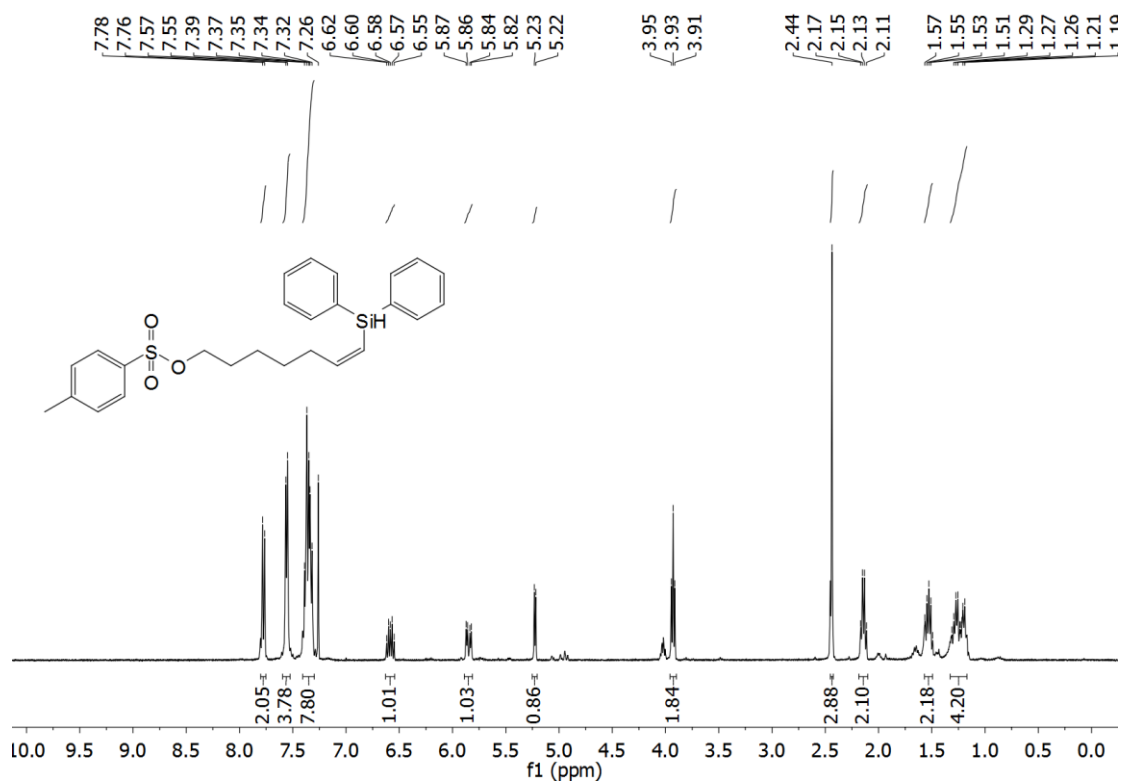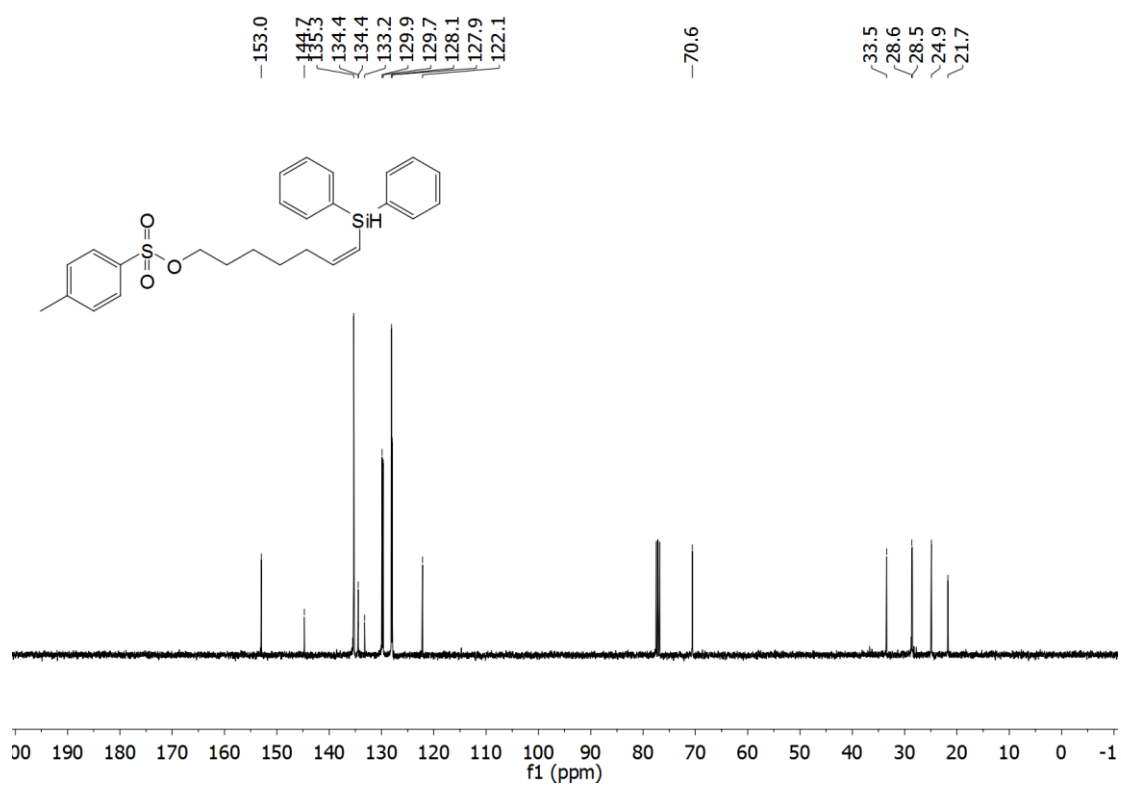

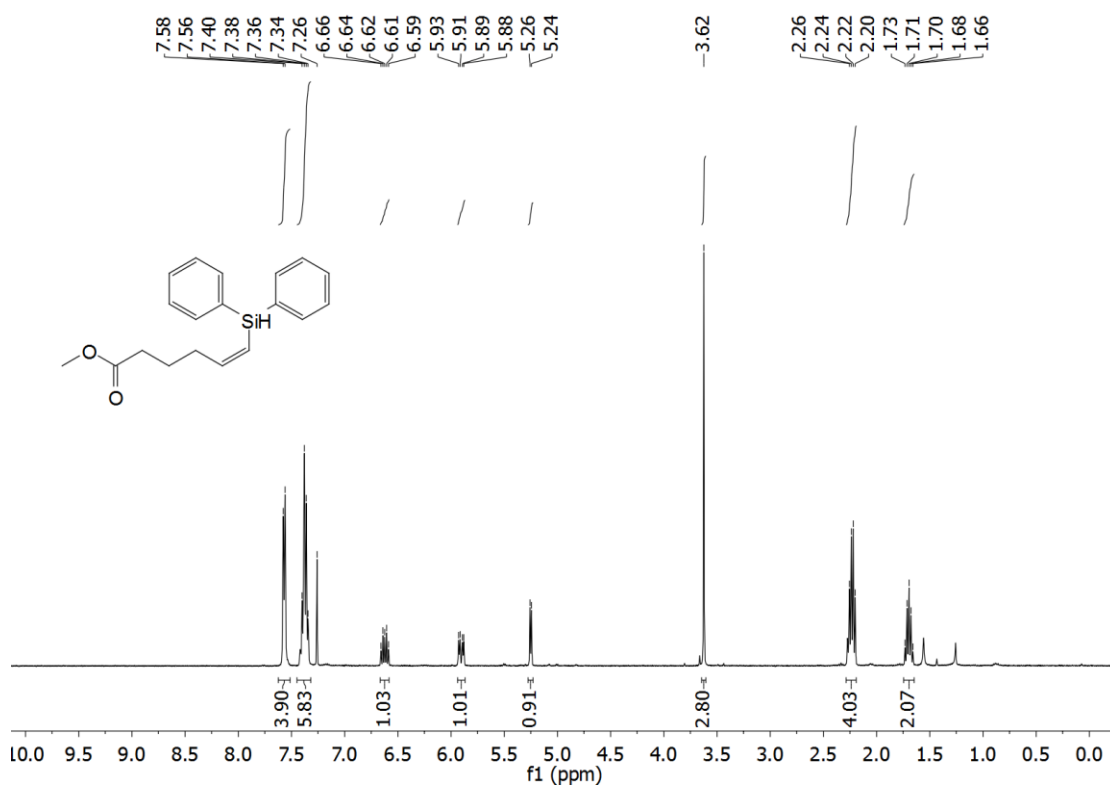

<sup>1</sup>H NMR (400 MHz, CDCl<sub>3</sub>) of **4o**

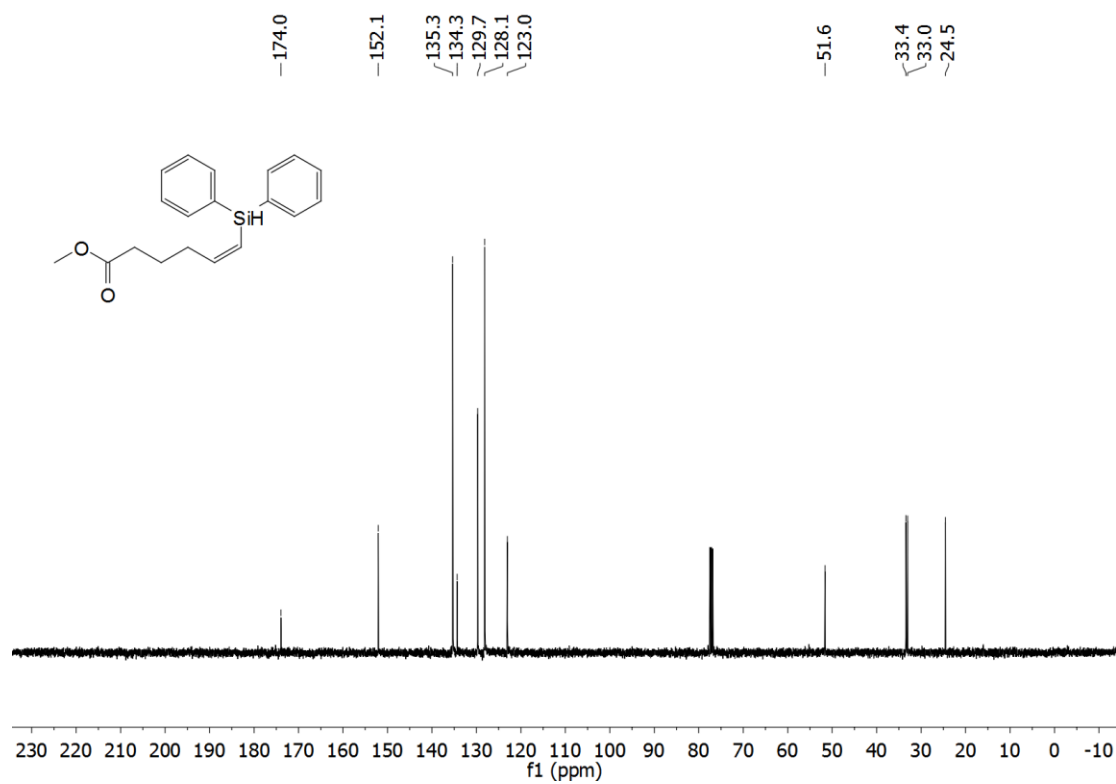

<sup>13</sup>C NMR (101 MHz, CDCl<sub>3</sub>) of **4o**



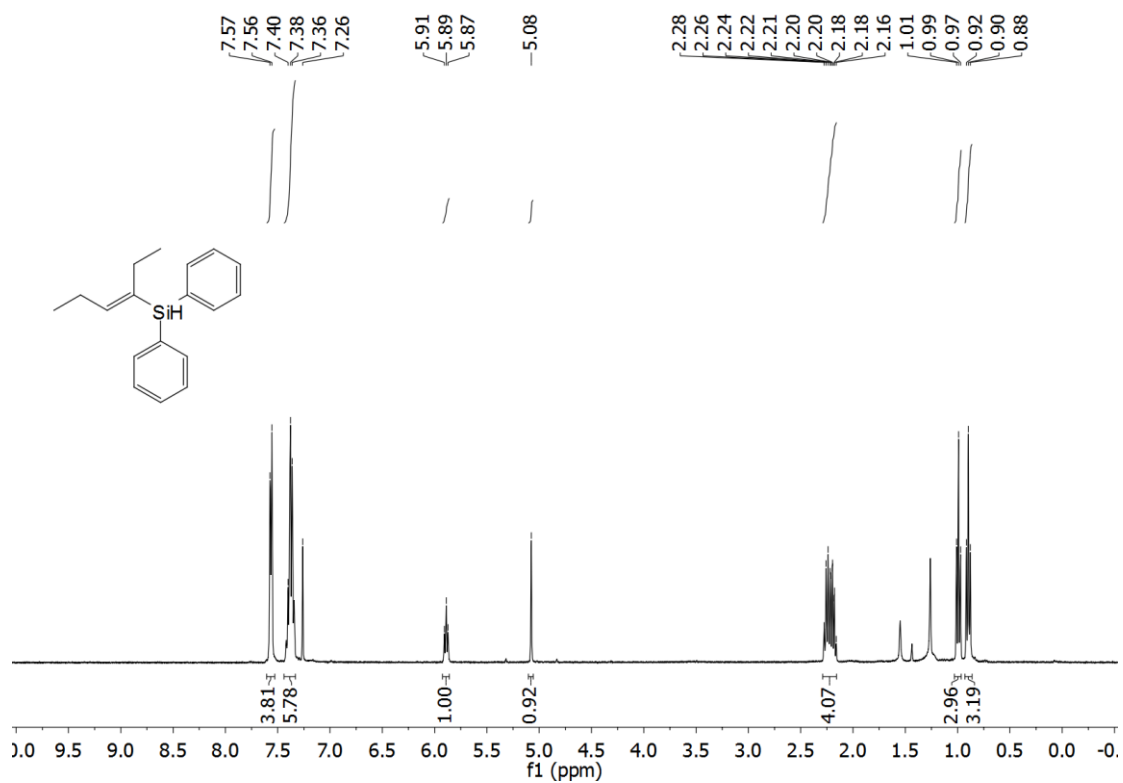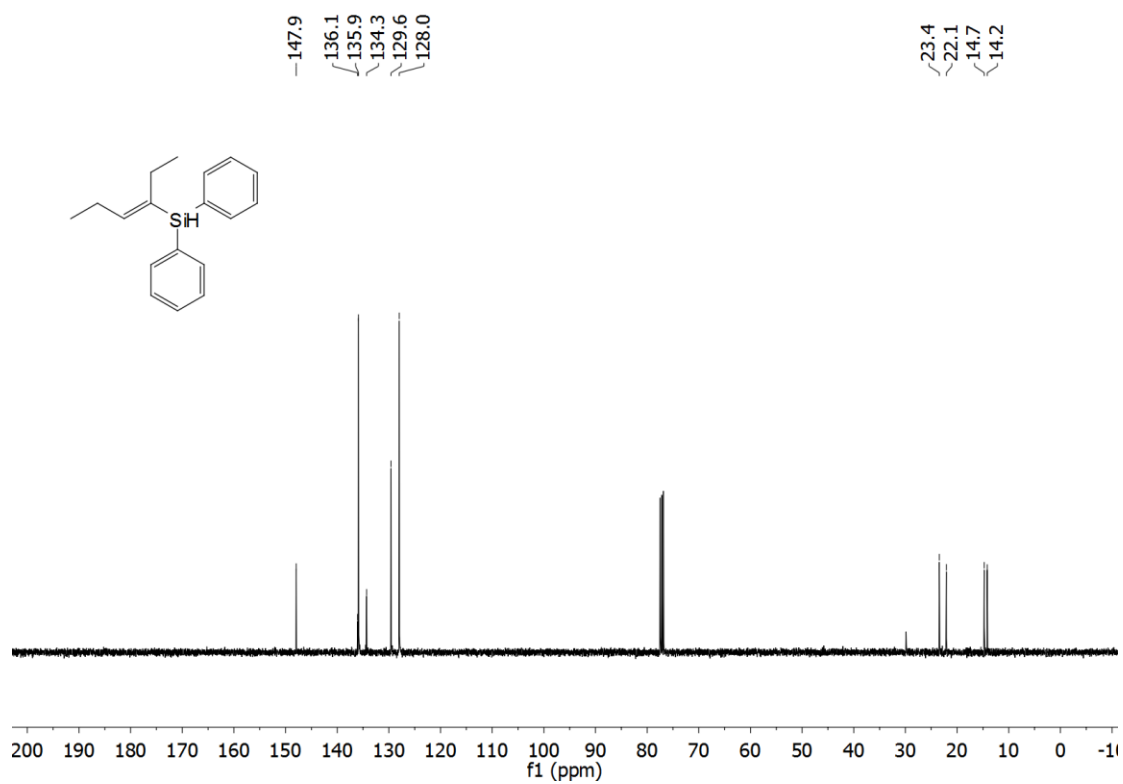

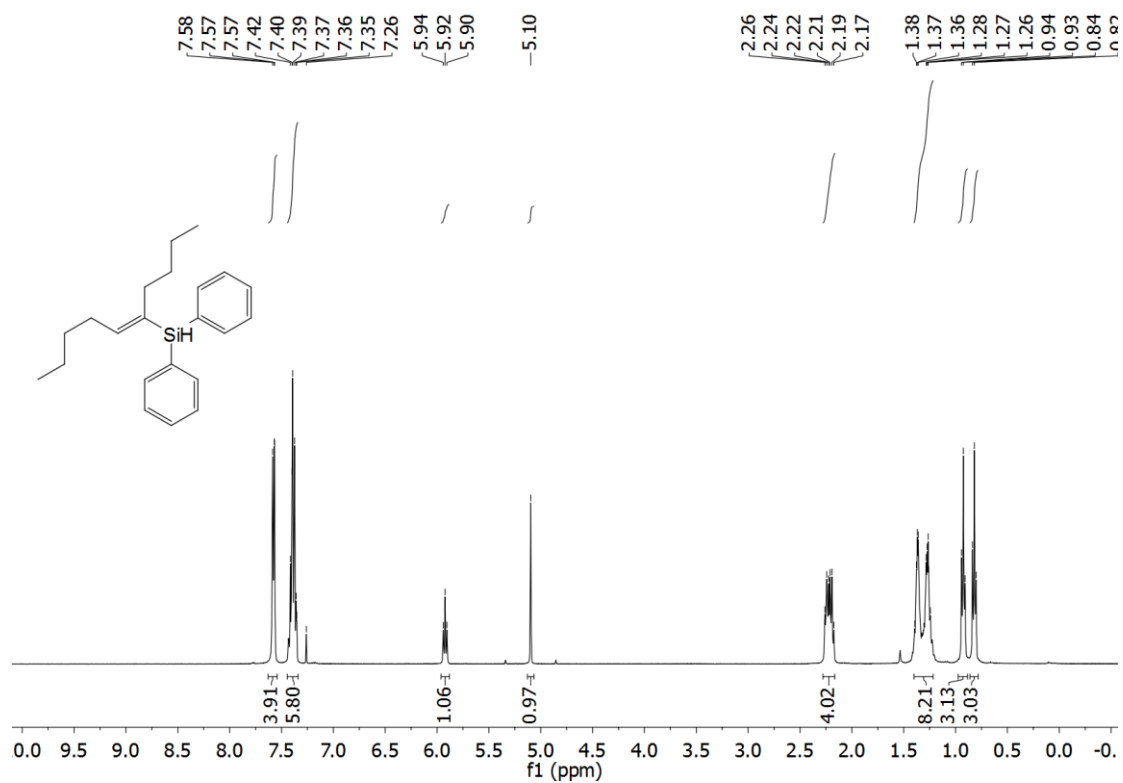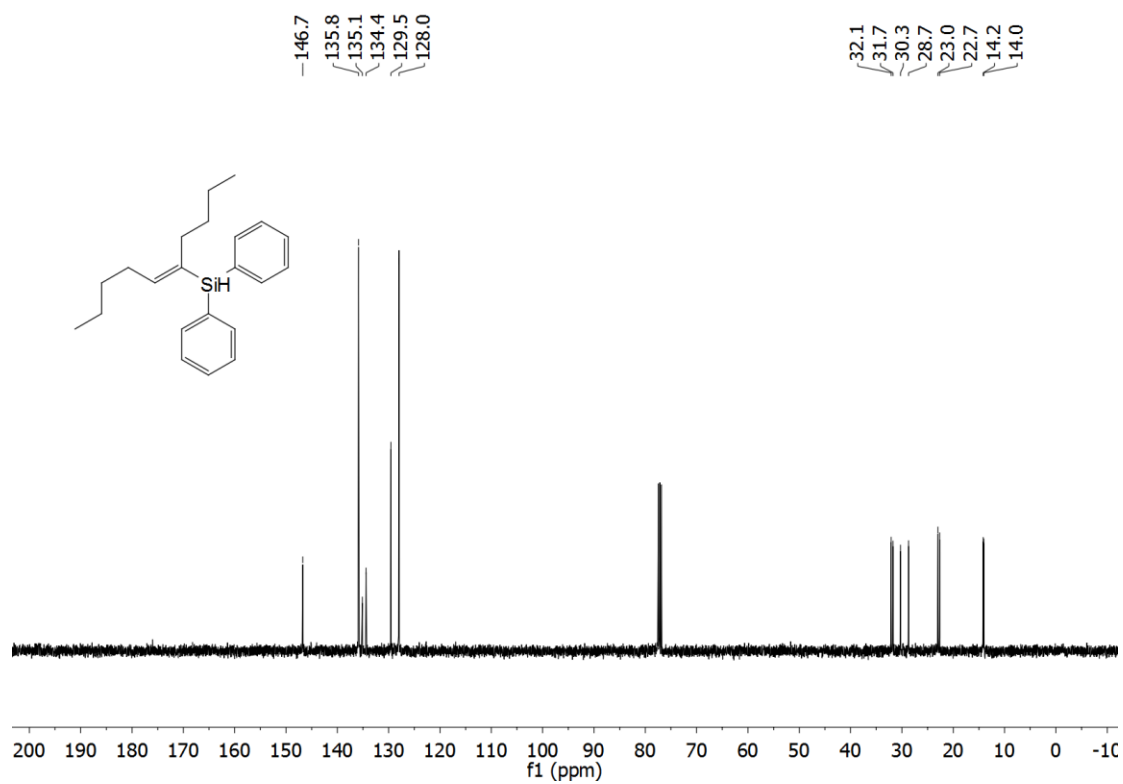

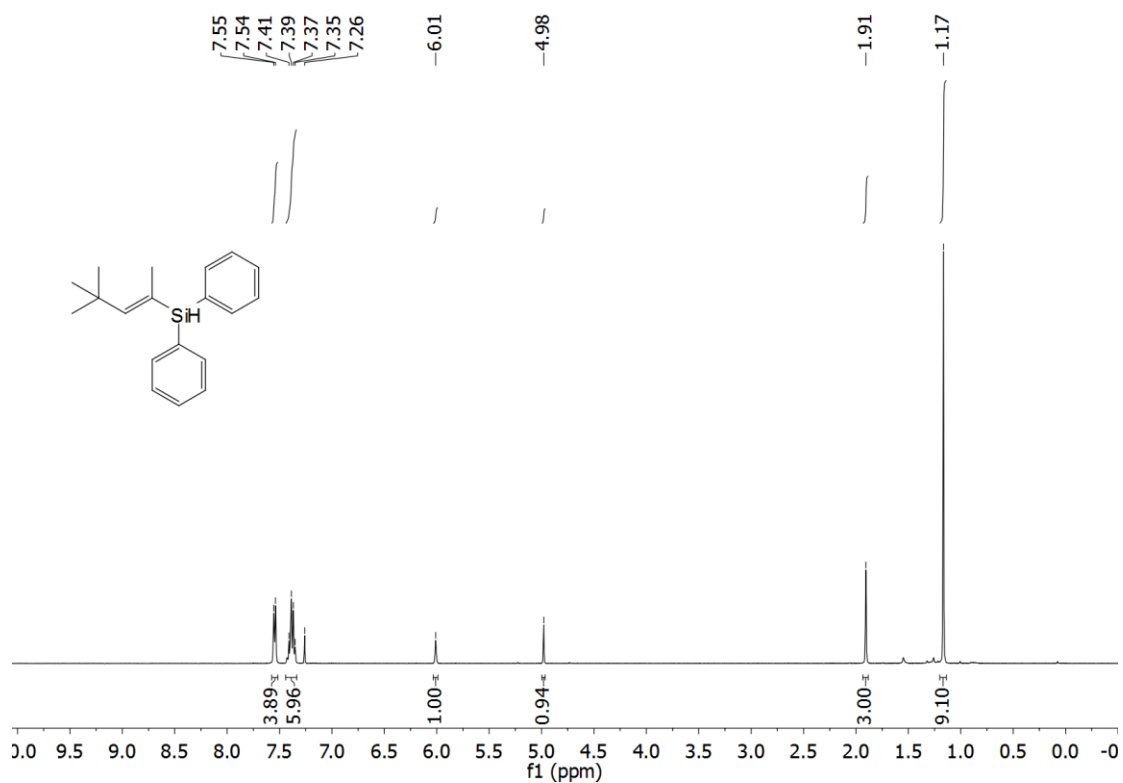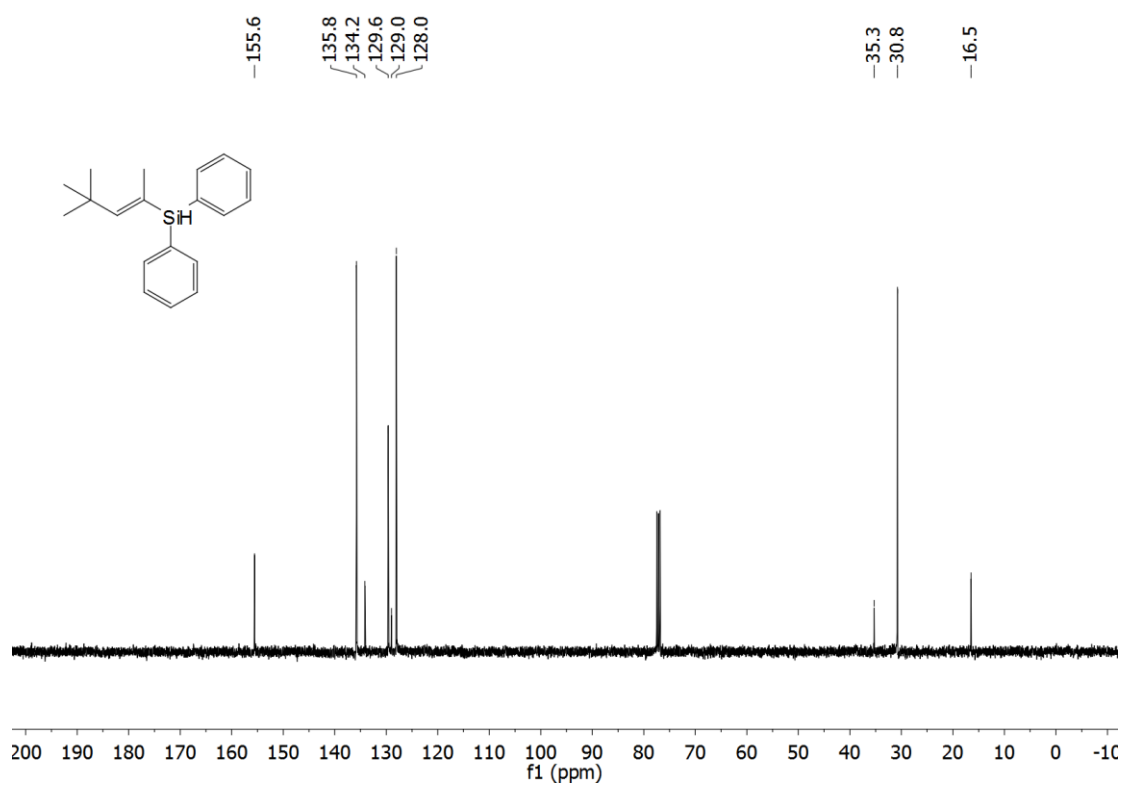

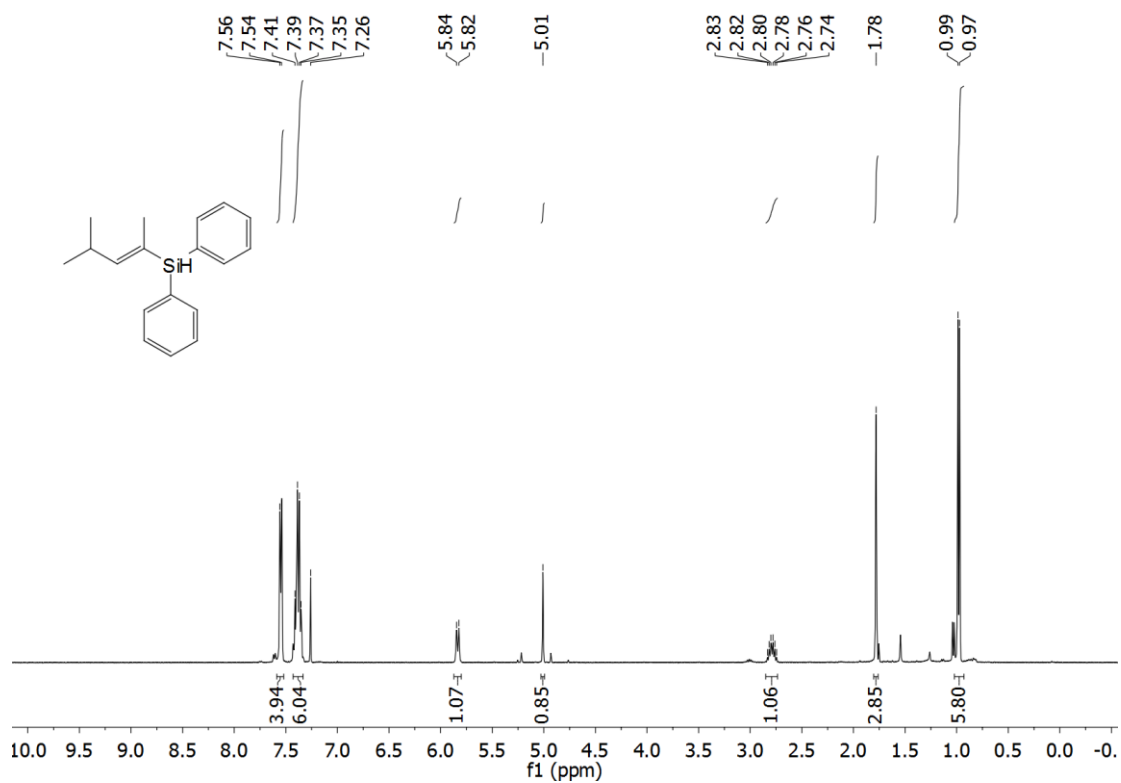

$^1\text{H}$  NMR (400 MHz,  $\text{CDCl}_3$ ) of **4s**

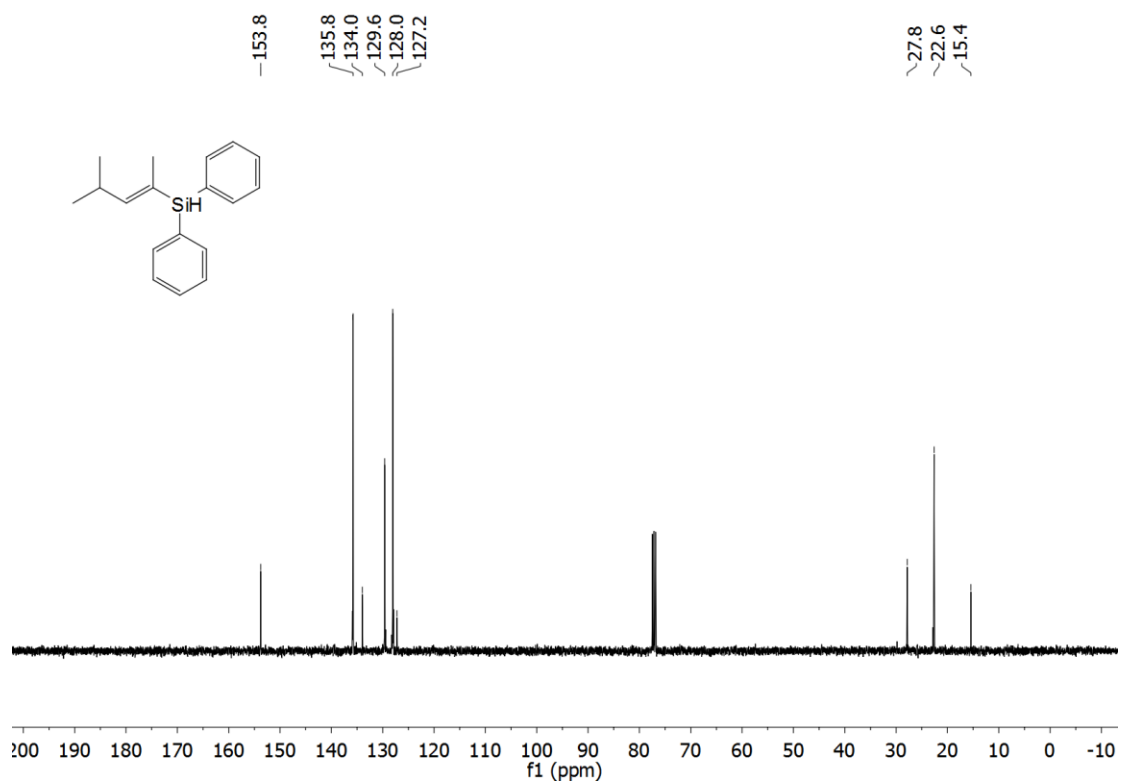

$^{13}\text{C}$  NMR (101 MHz,  $\text{CDCl}_3$ ) of **4s**

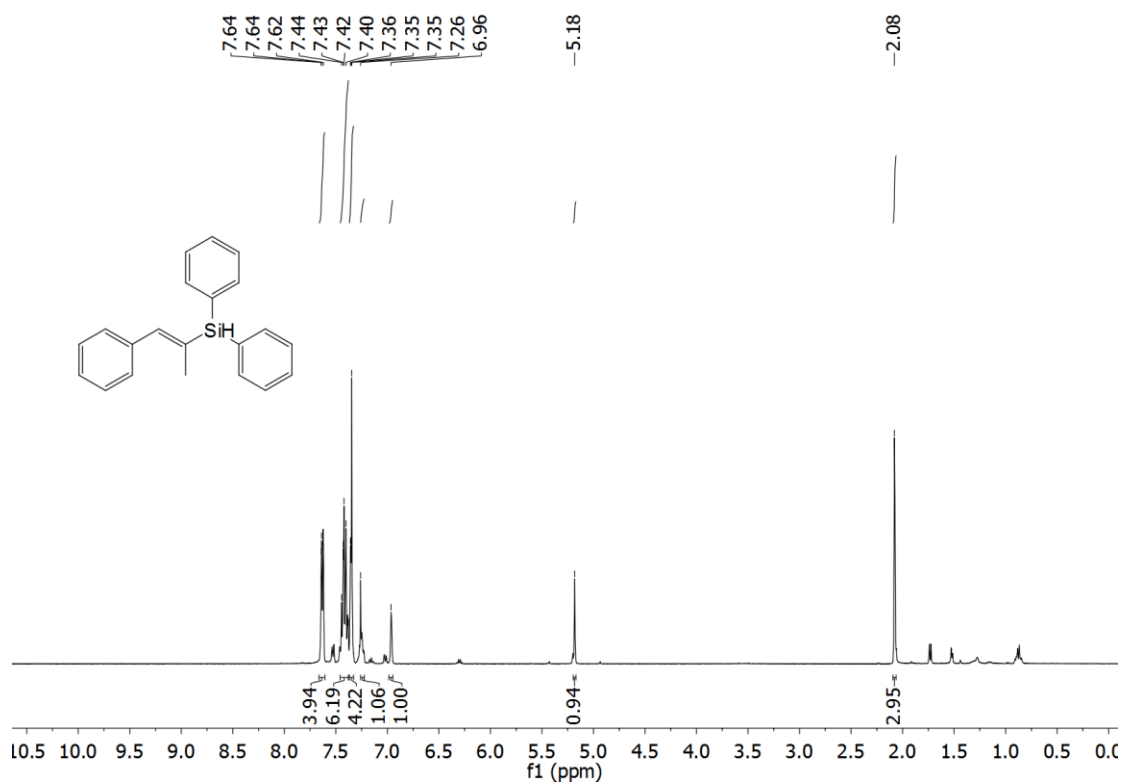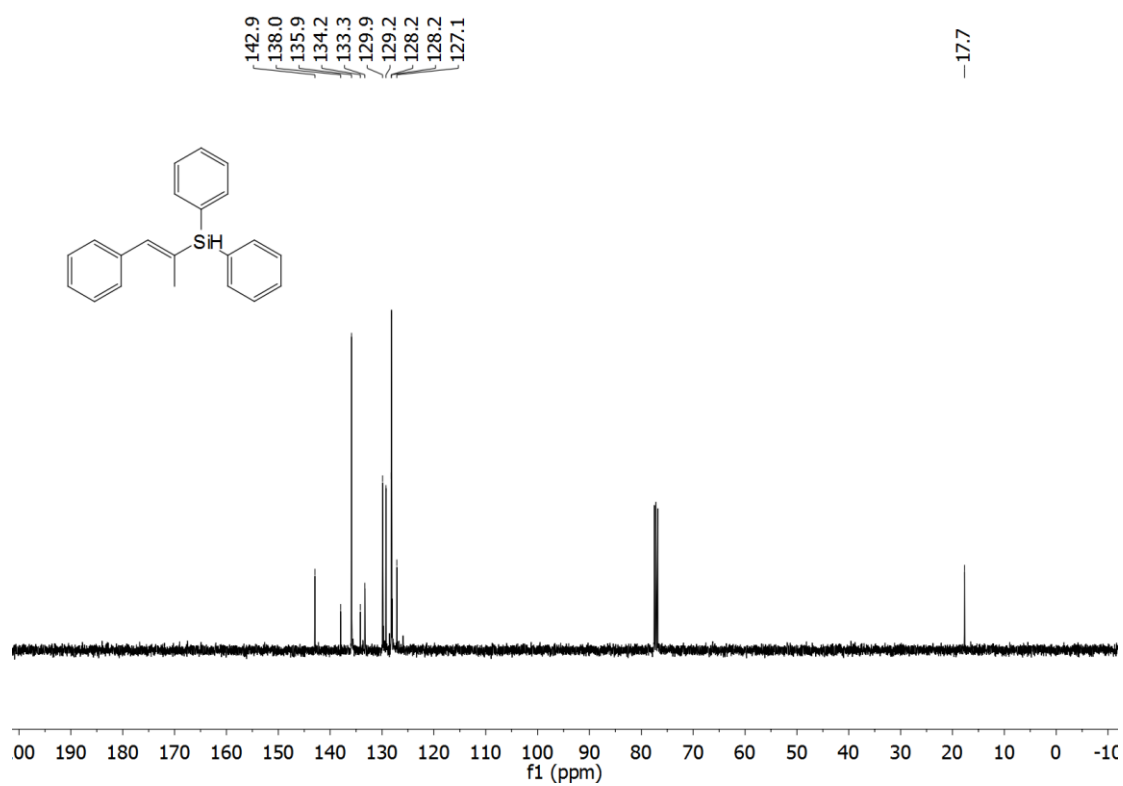

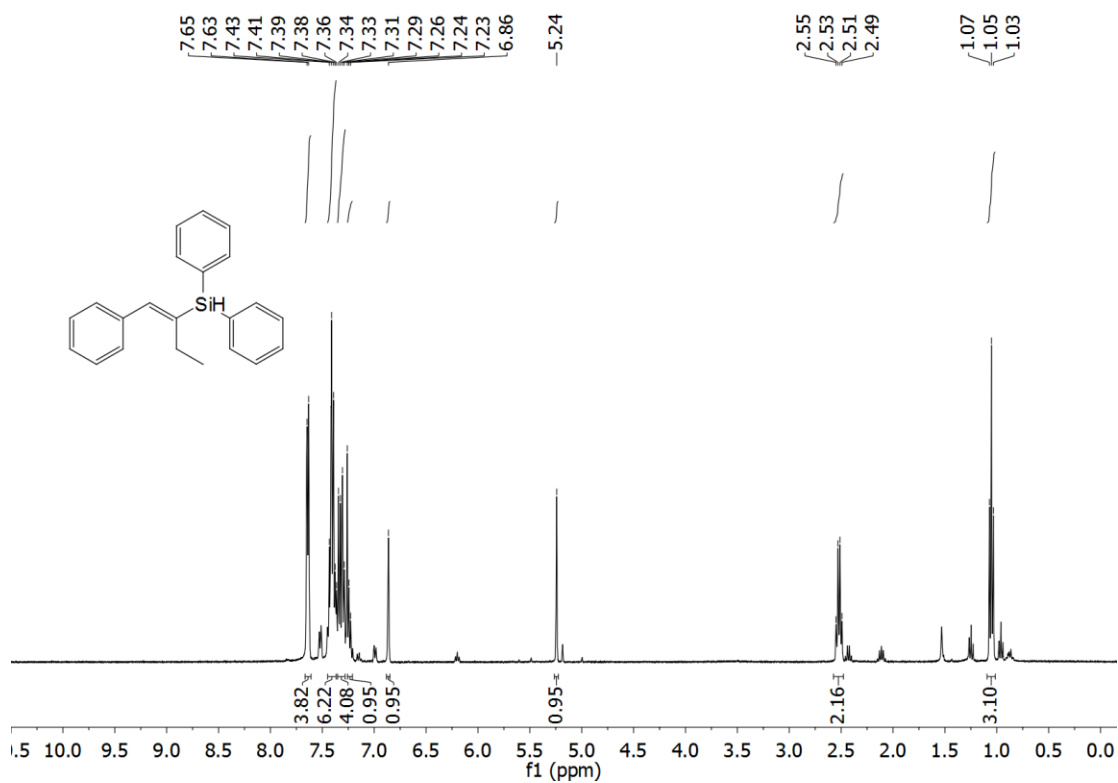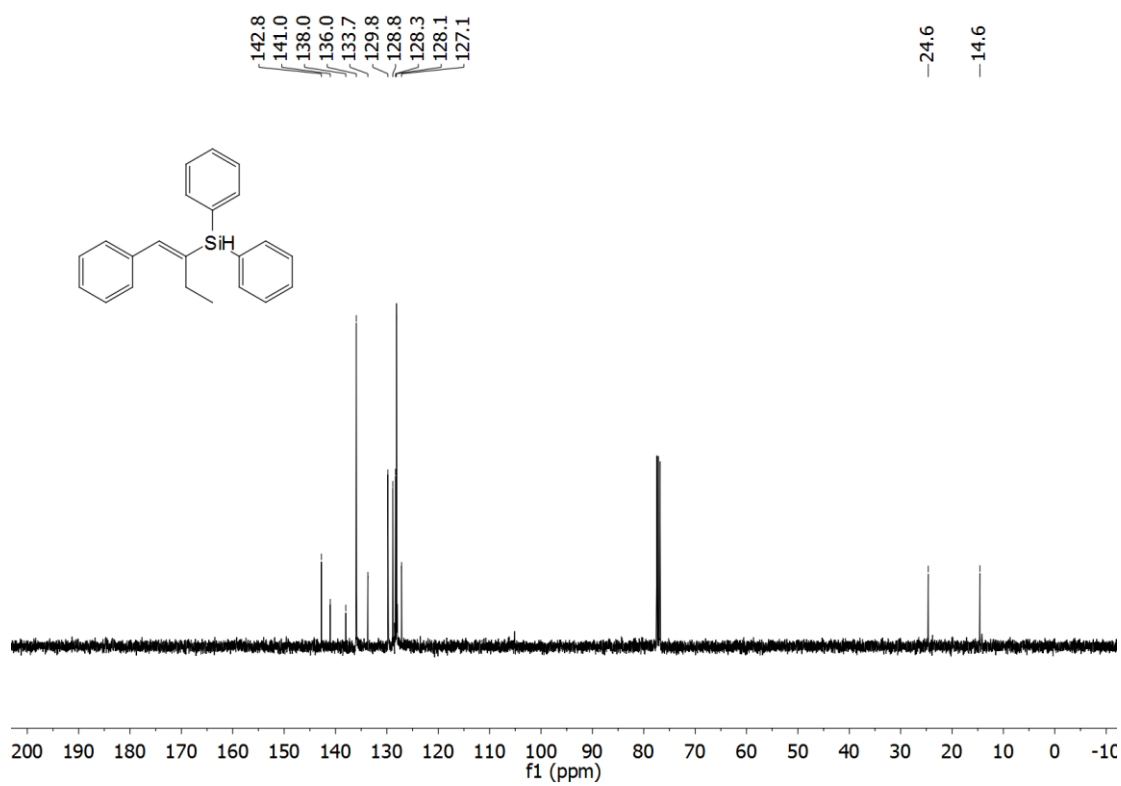

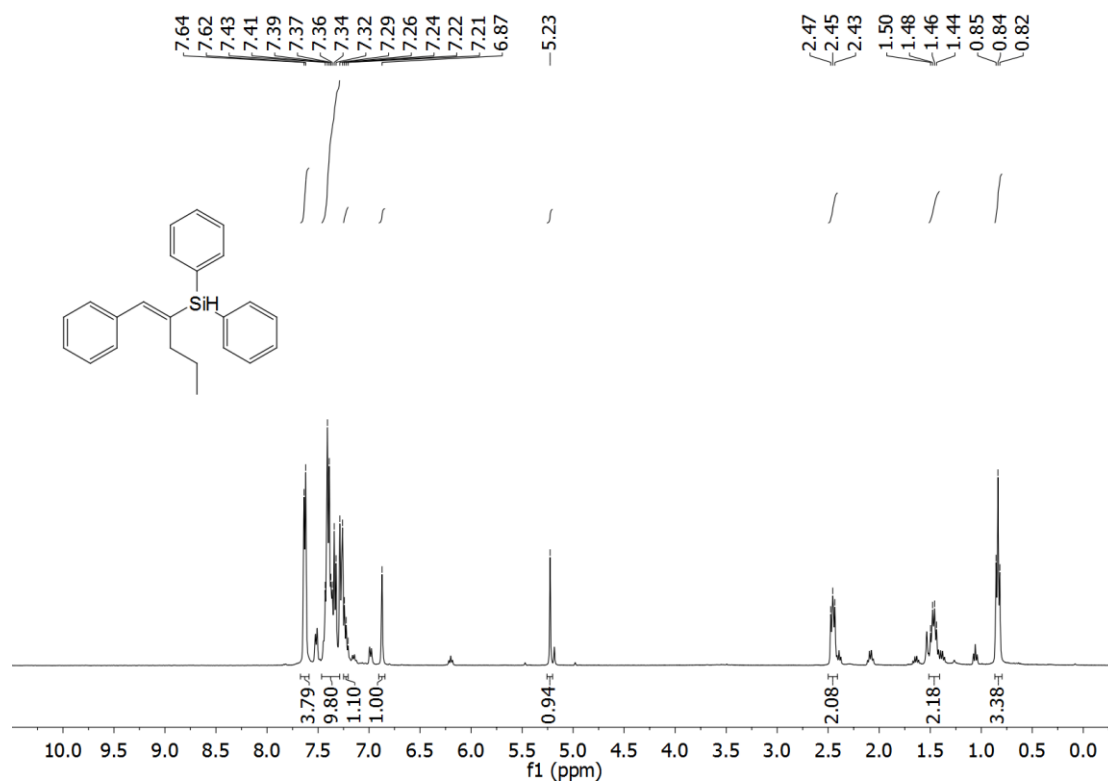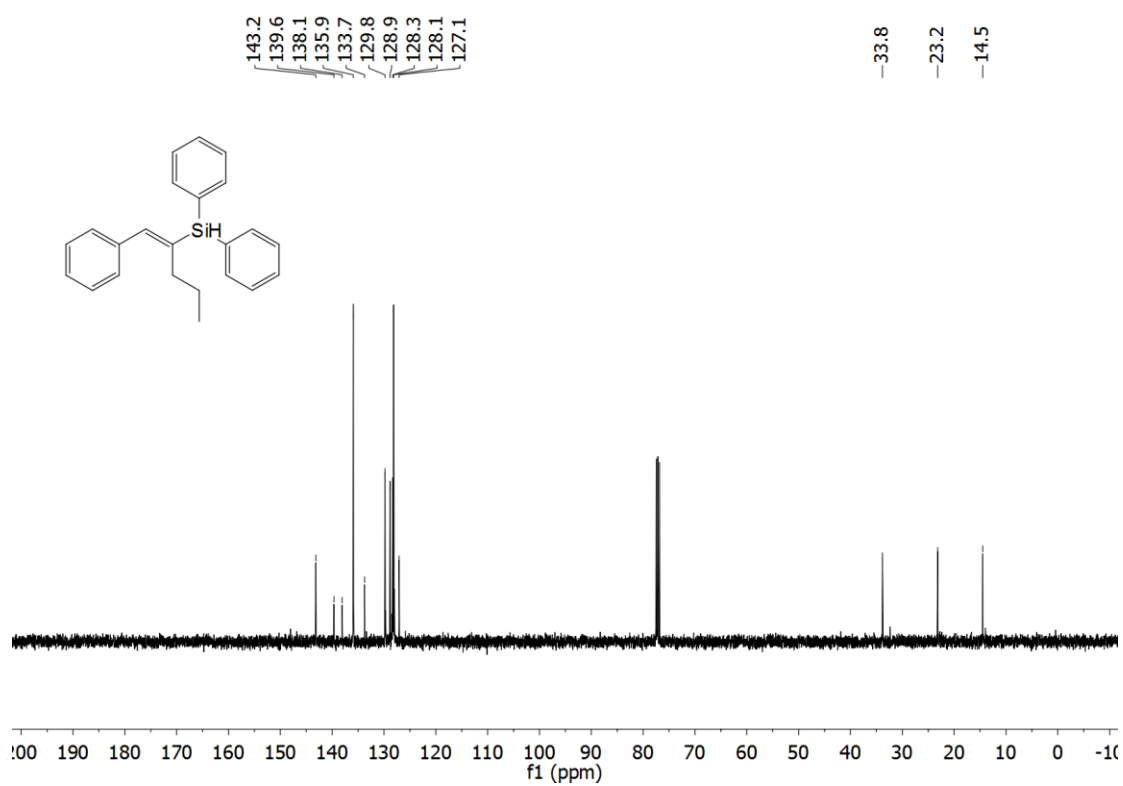

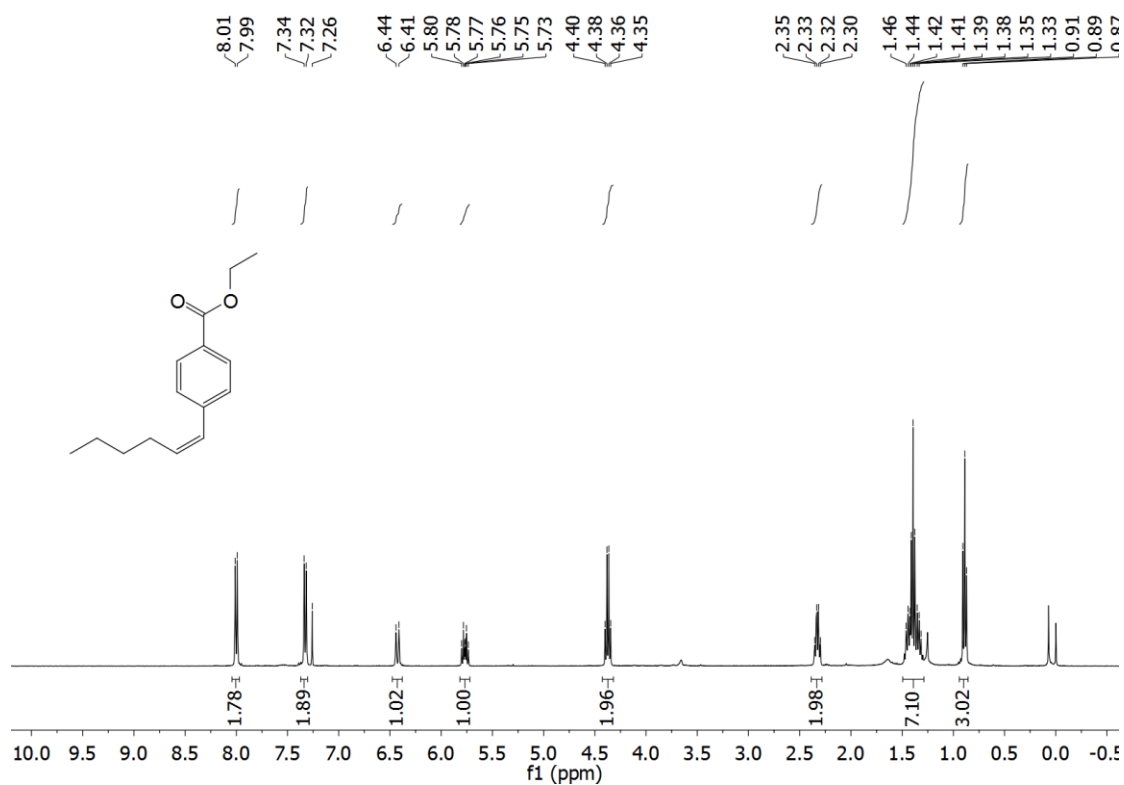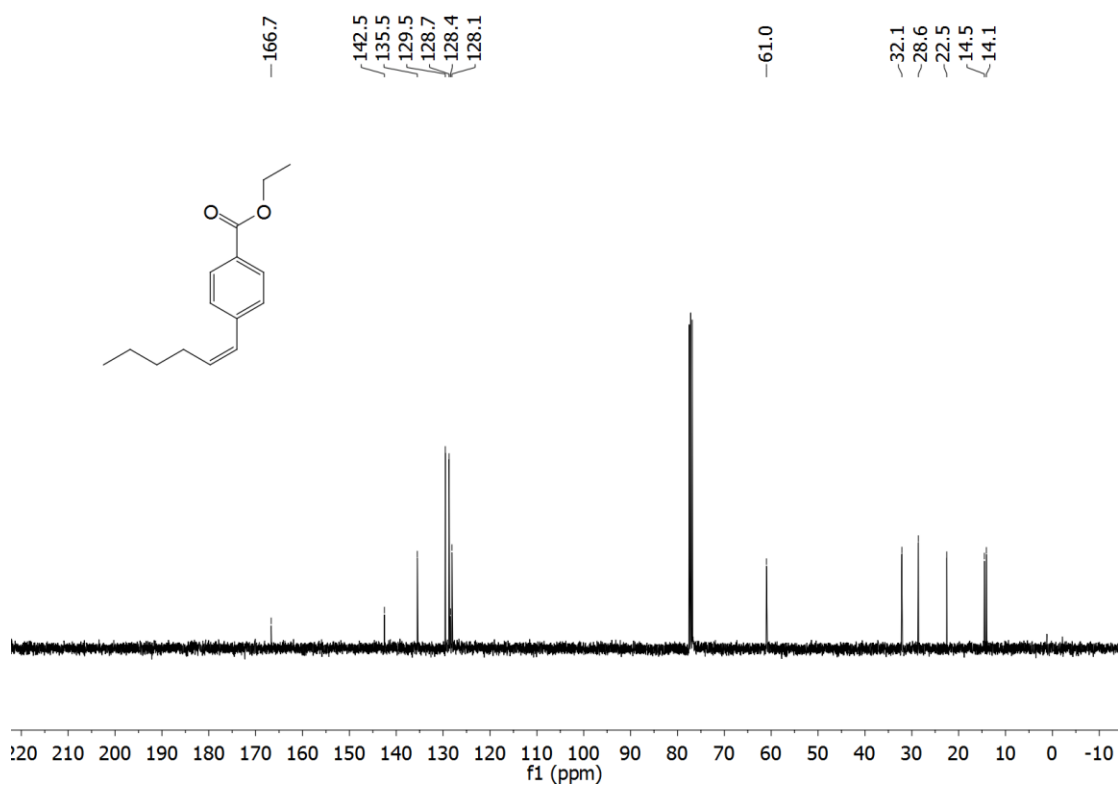



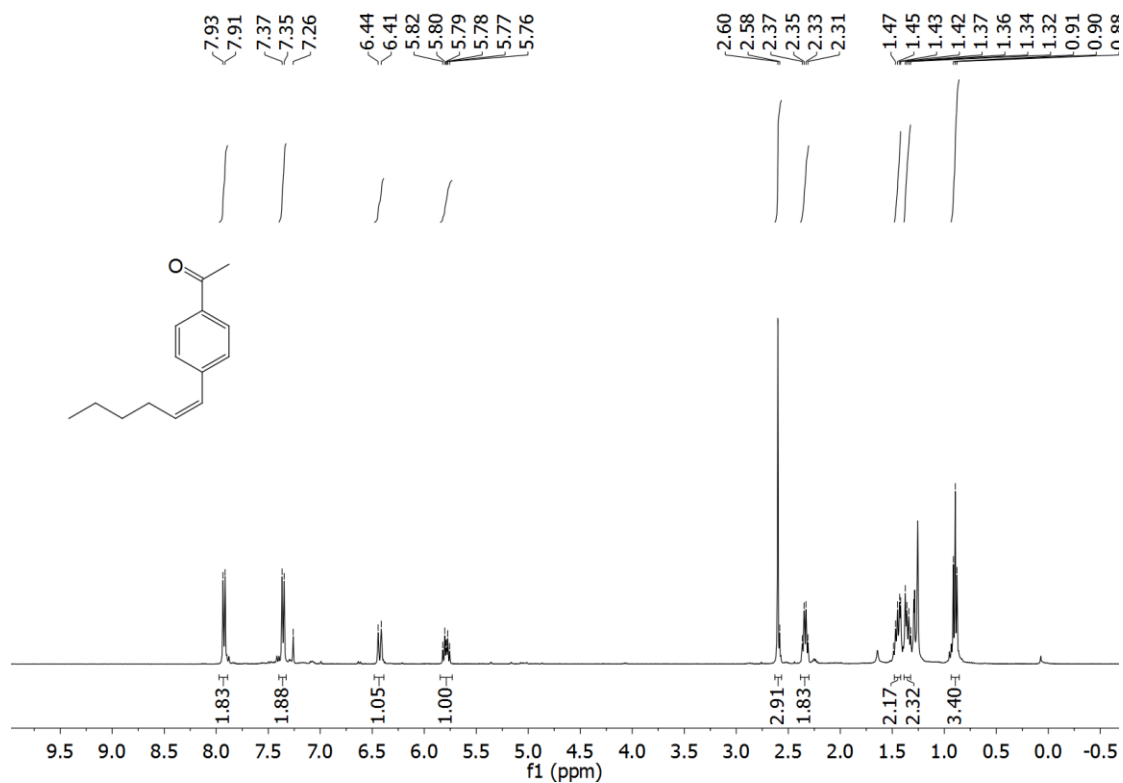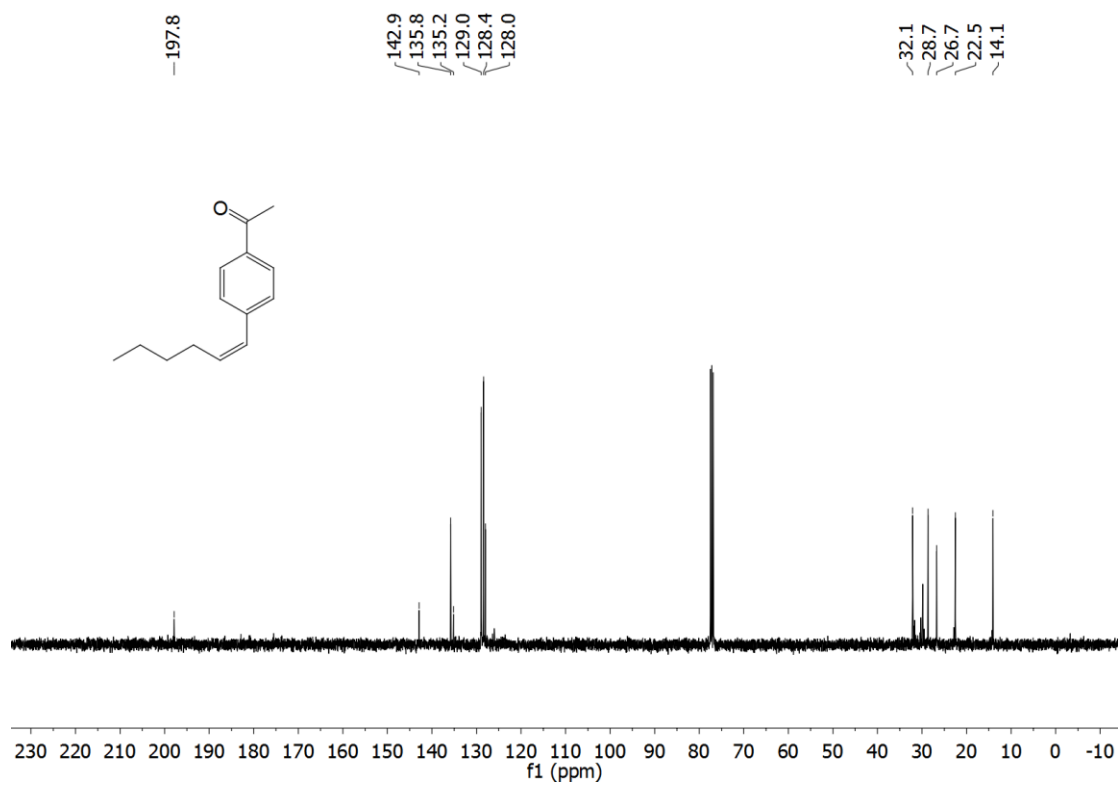

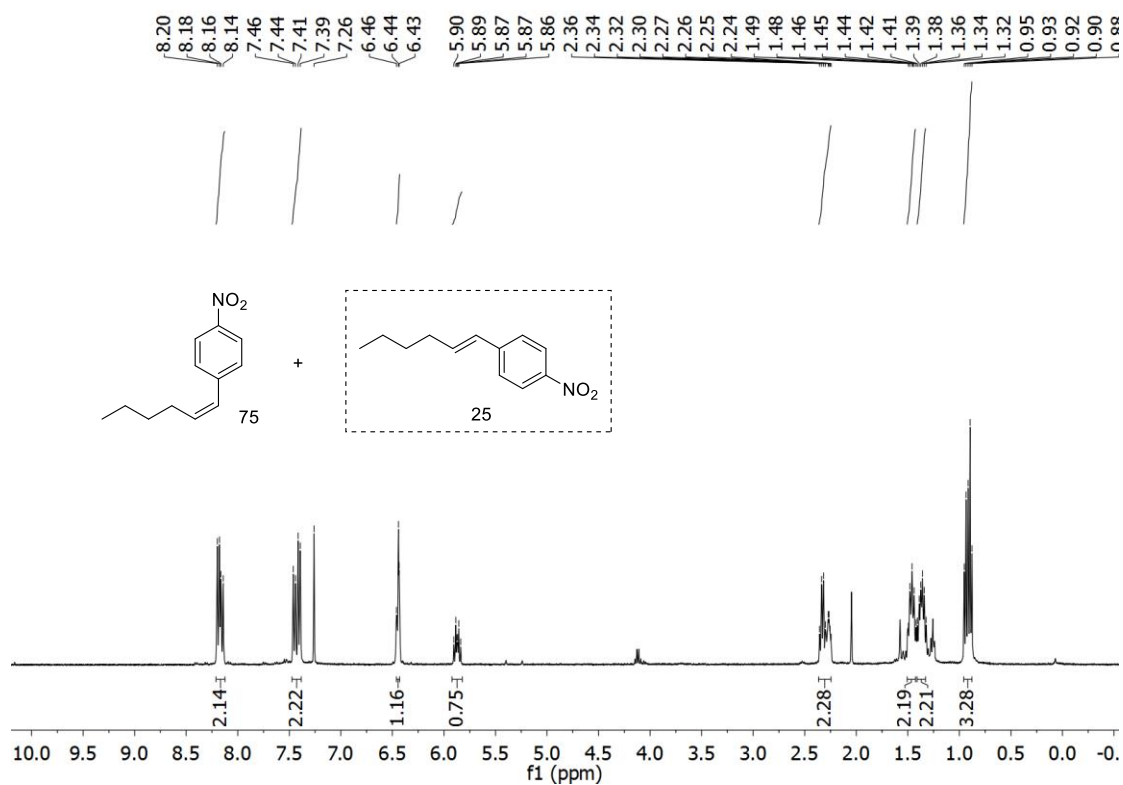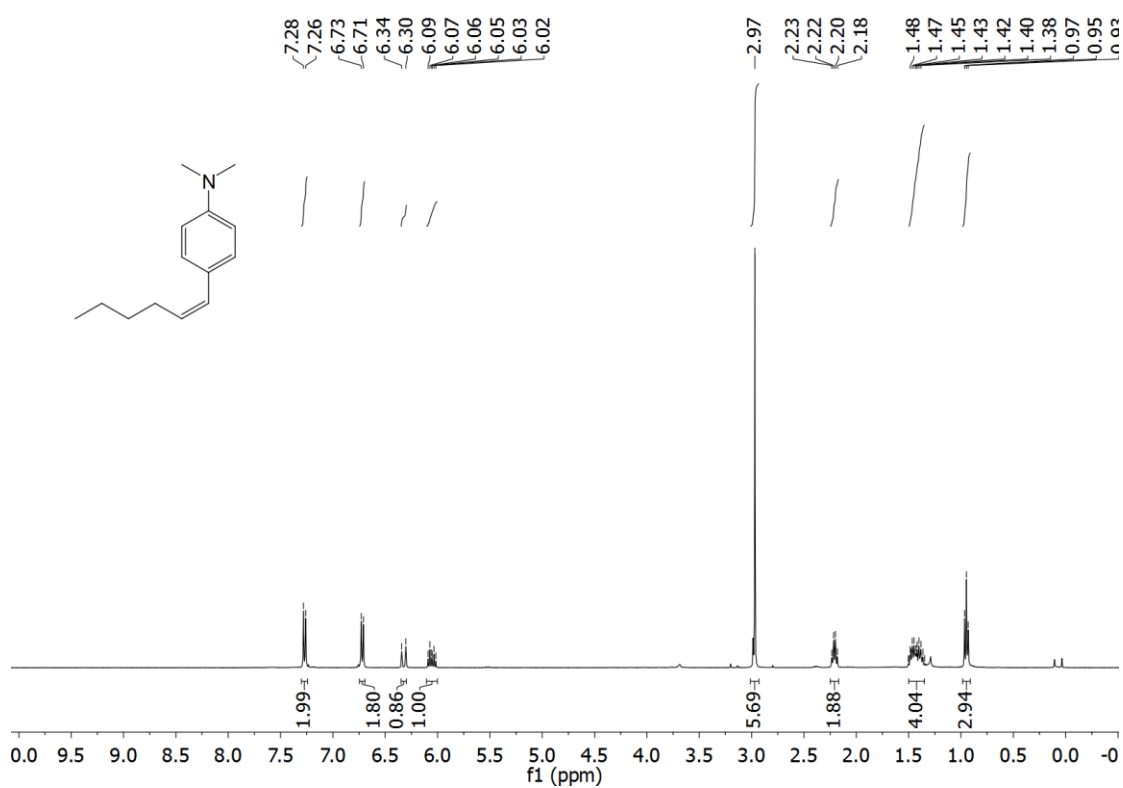

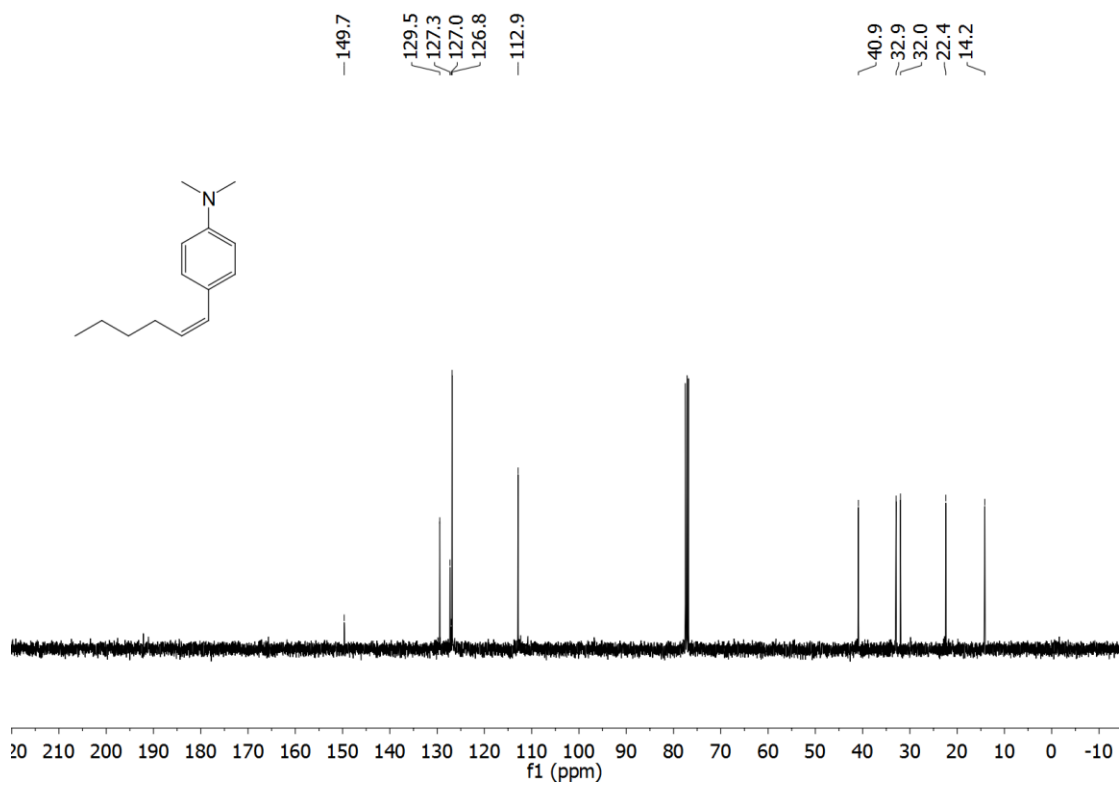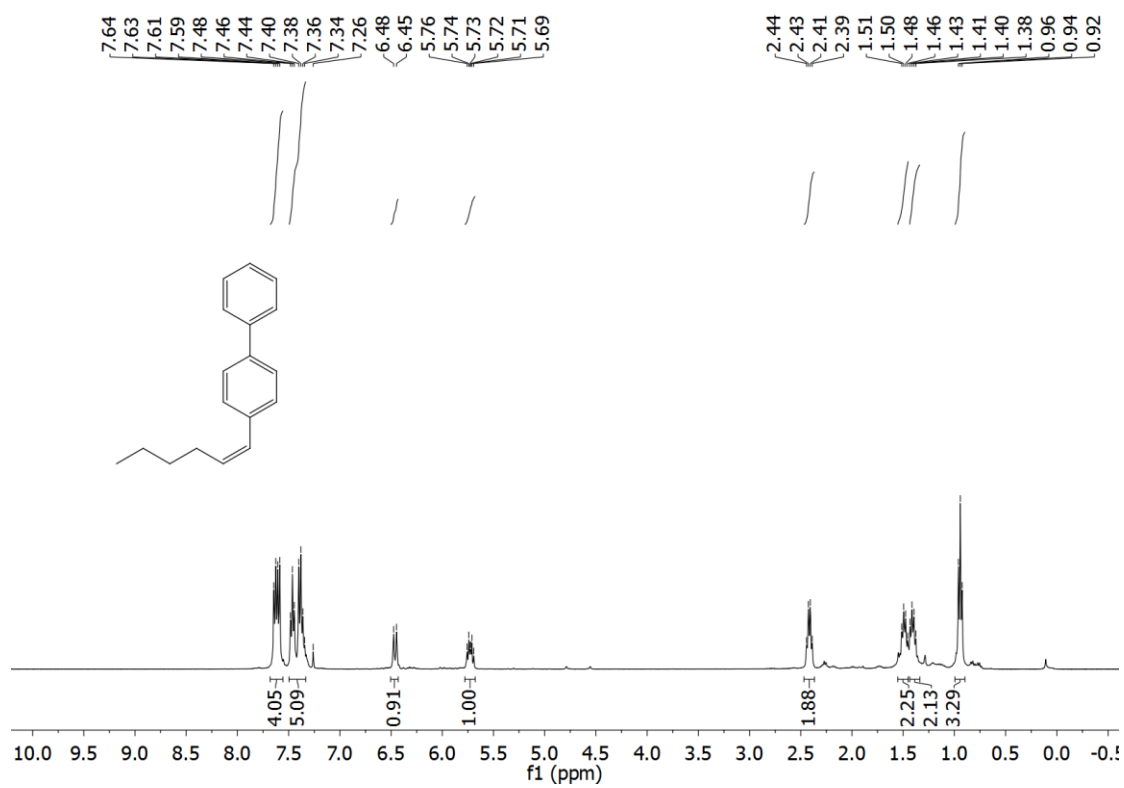

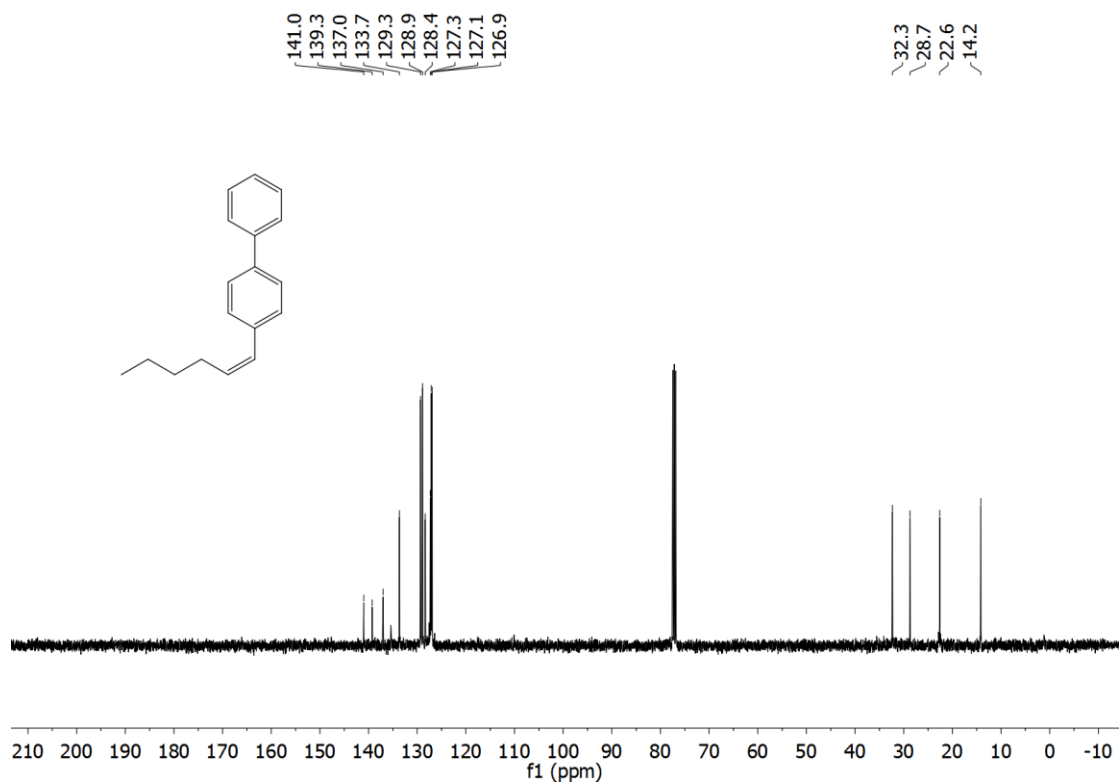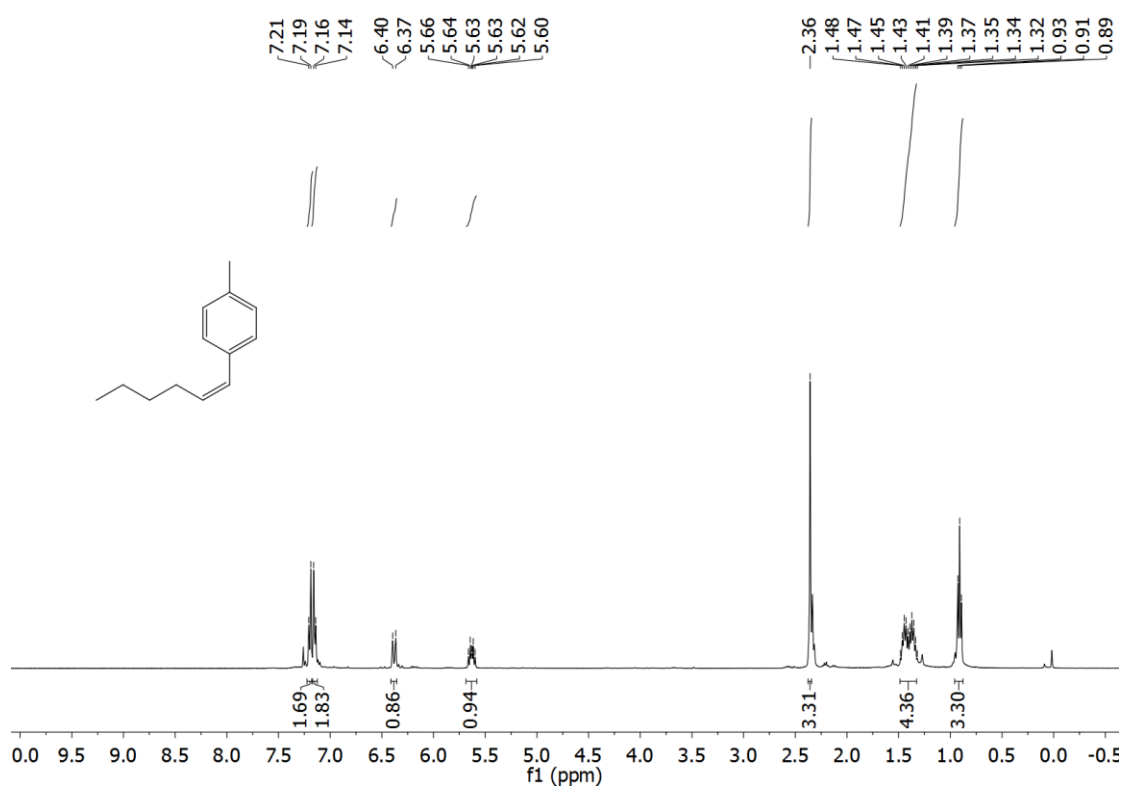

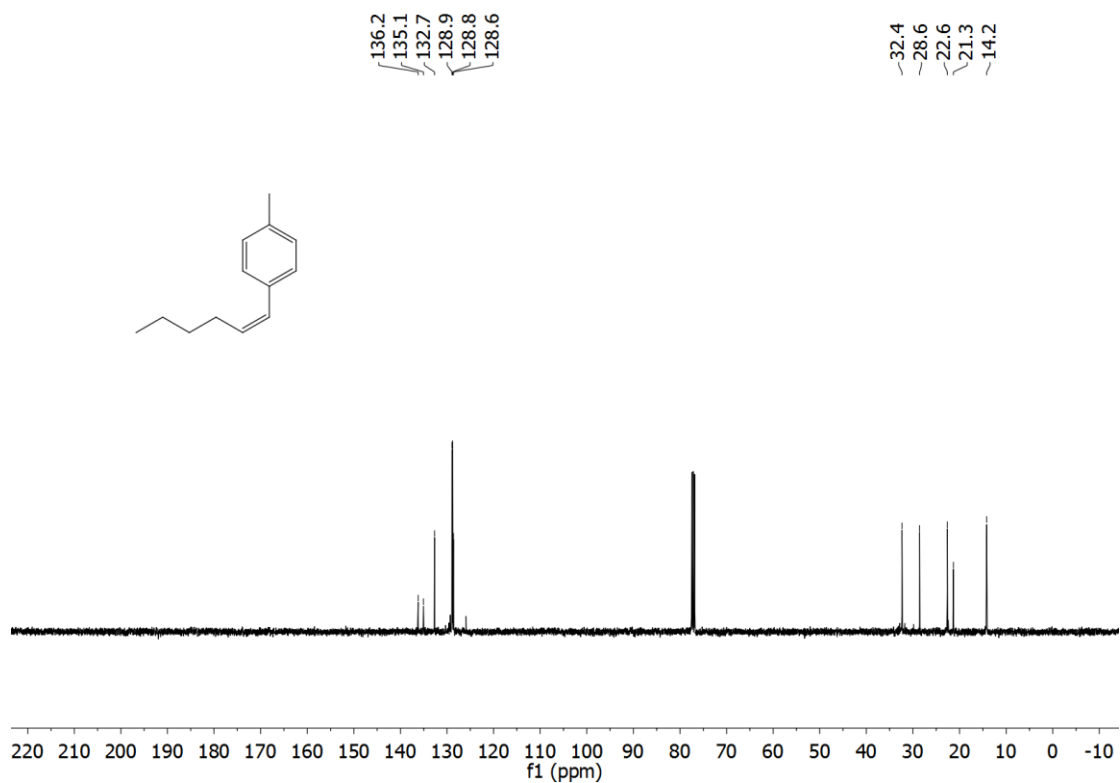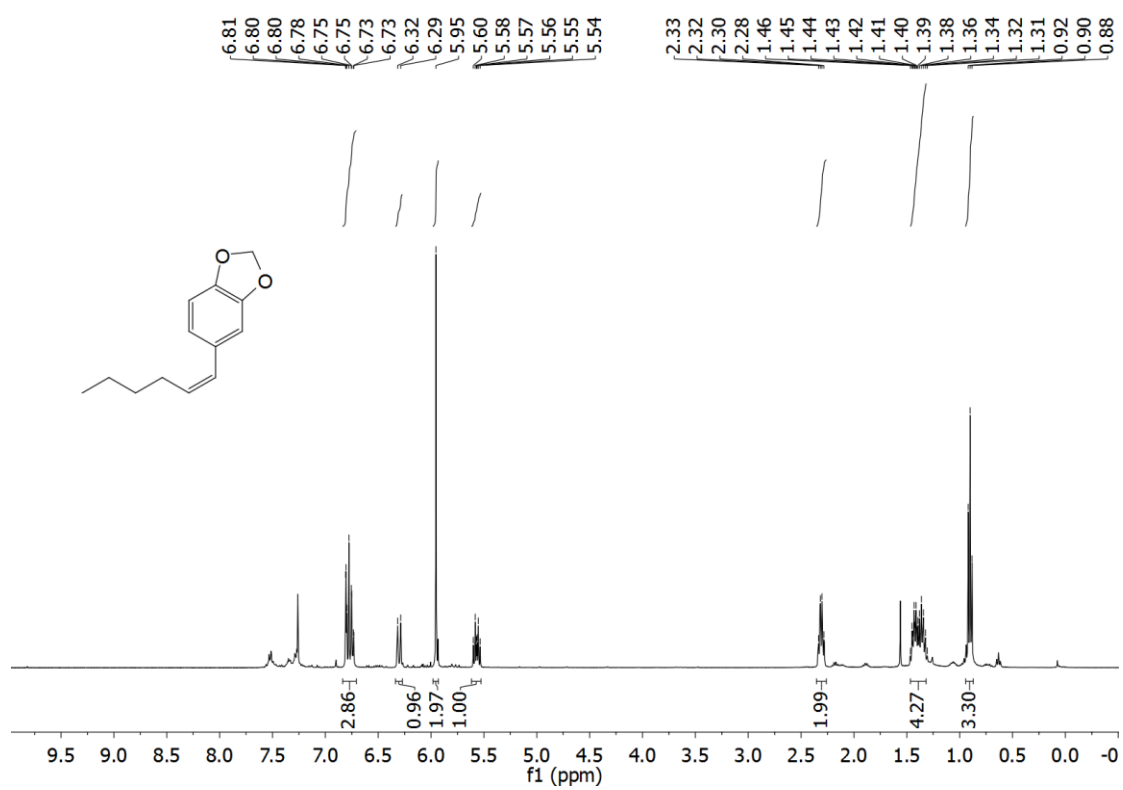

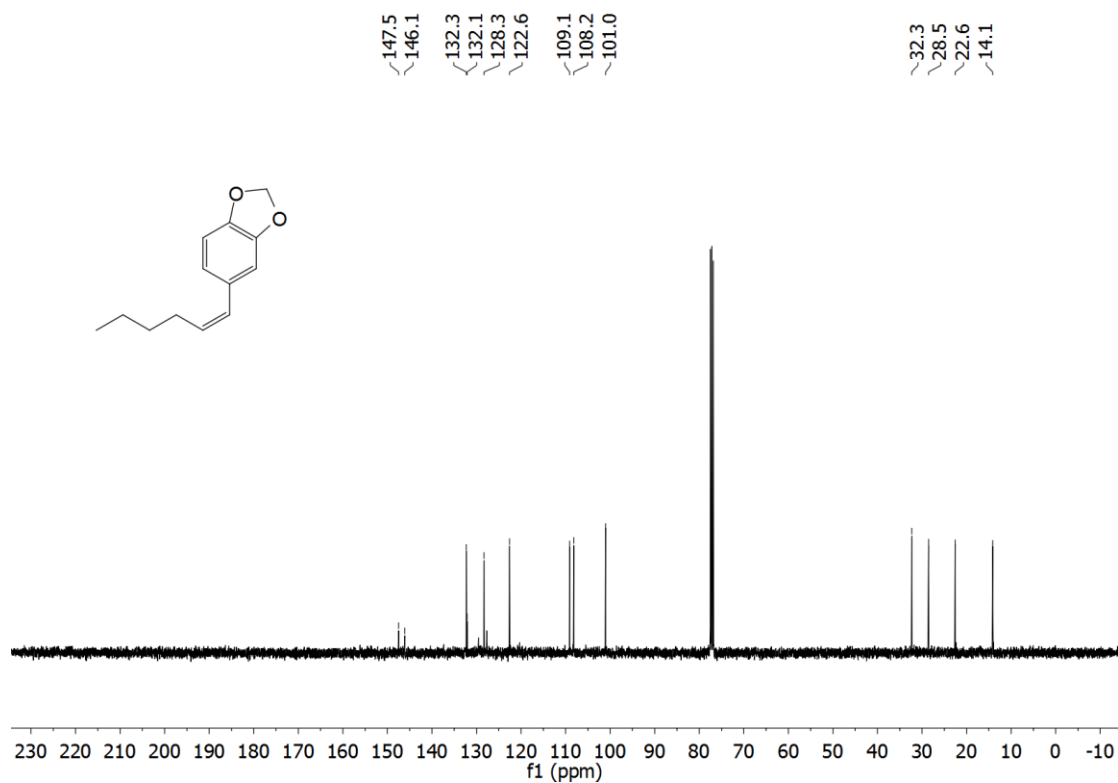

<sup>13</sup>C NMR (101 MHz, CDCl<sub>3</sub>) of **7g**

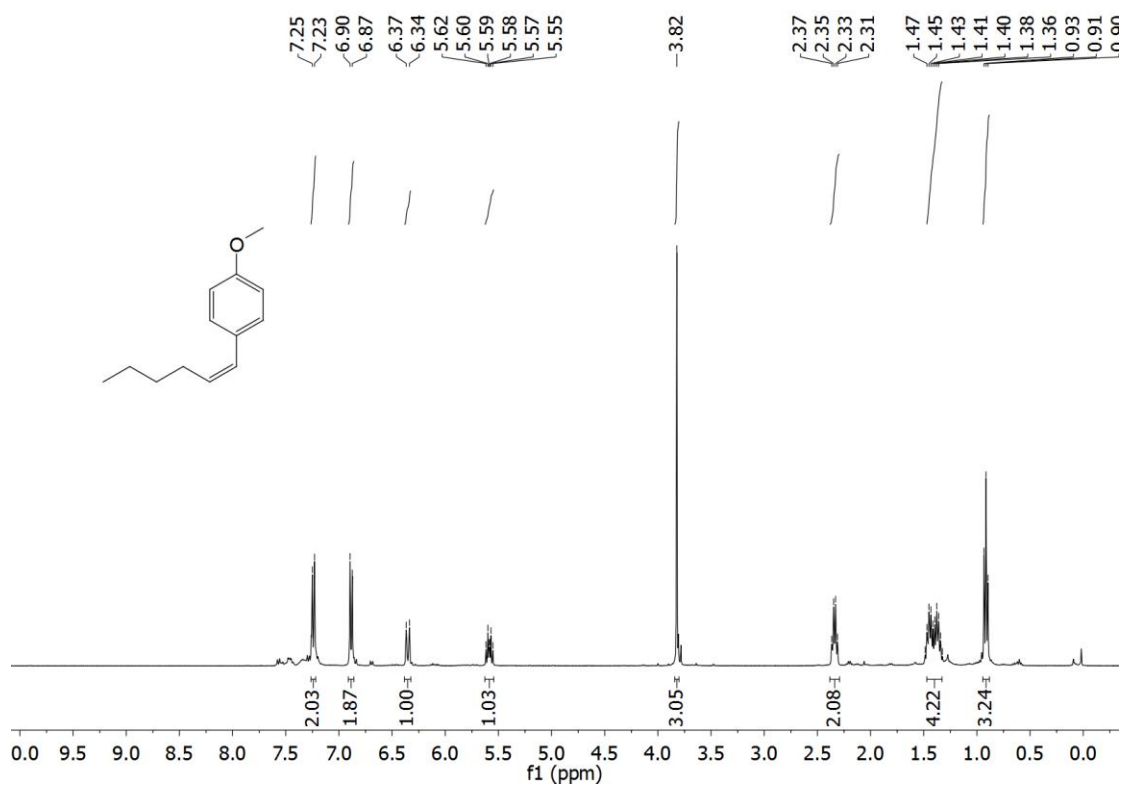

<sup>1</sup>H NMR (400 MHz, CDCl<sub>3</sub>) of **7h**

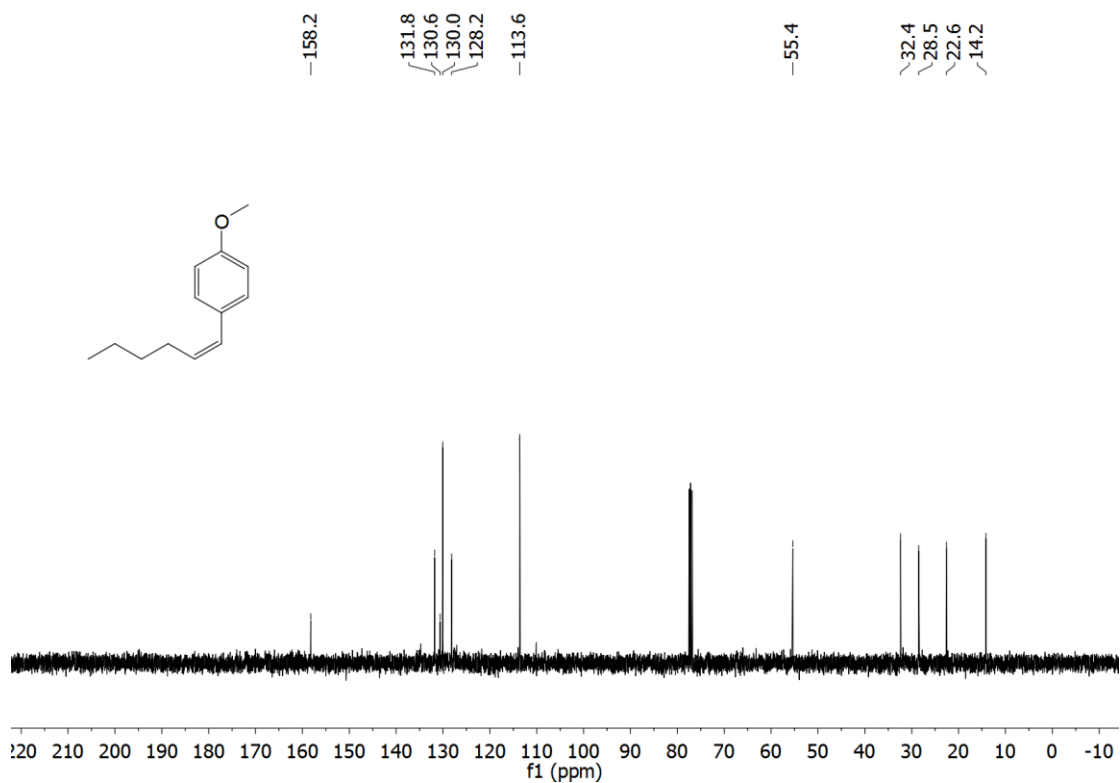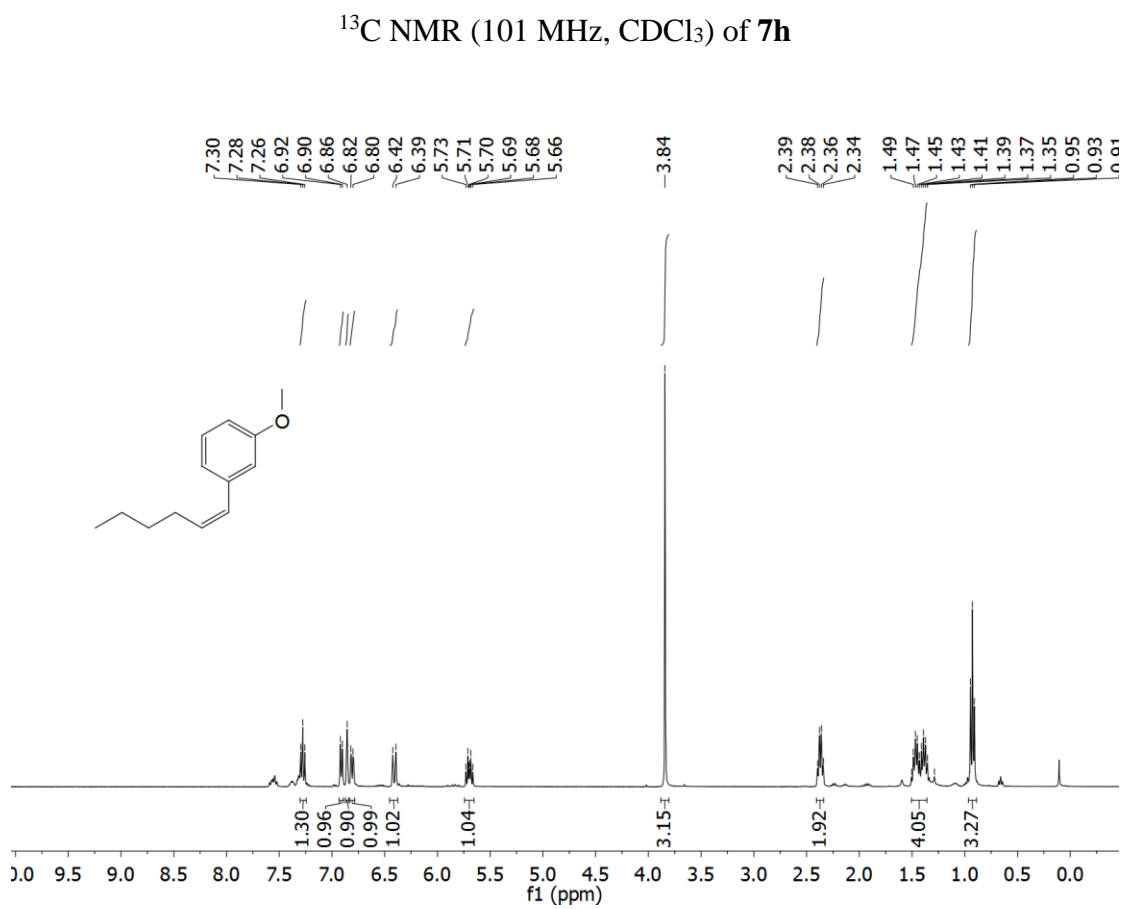

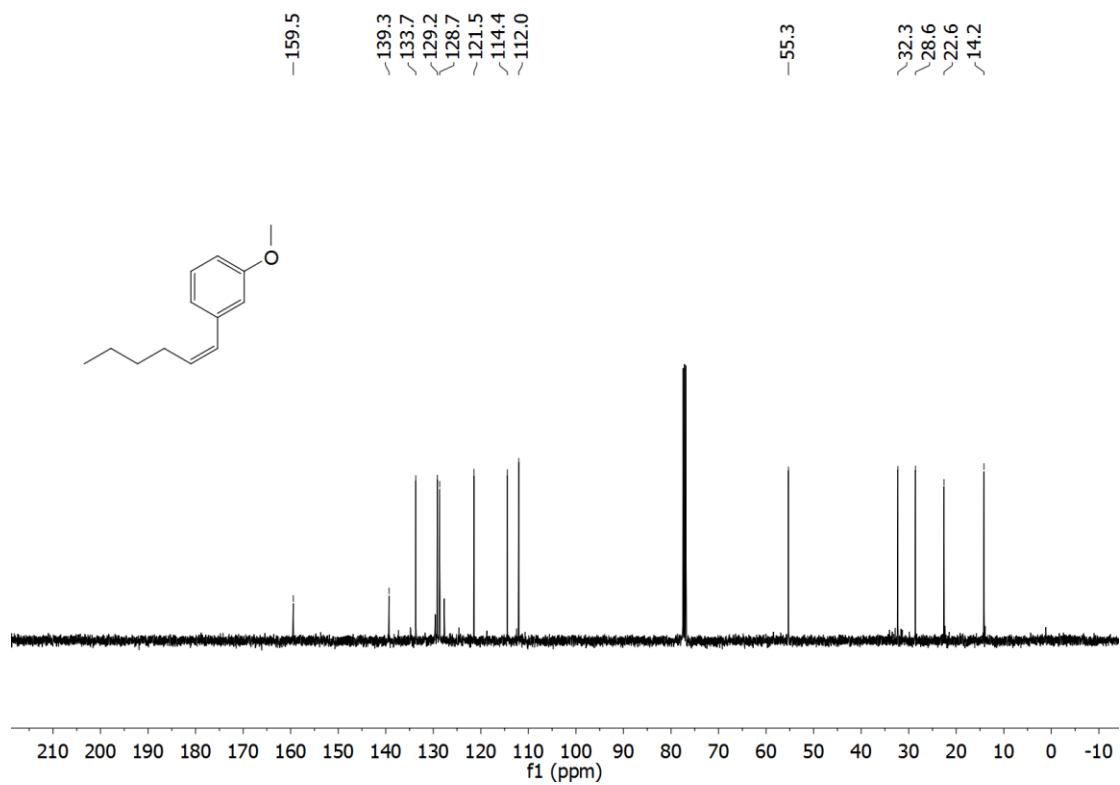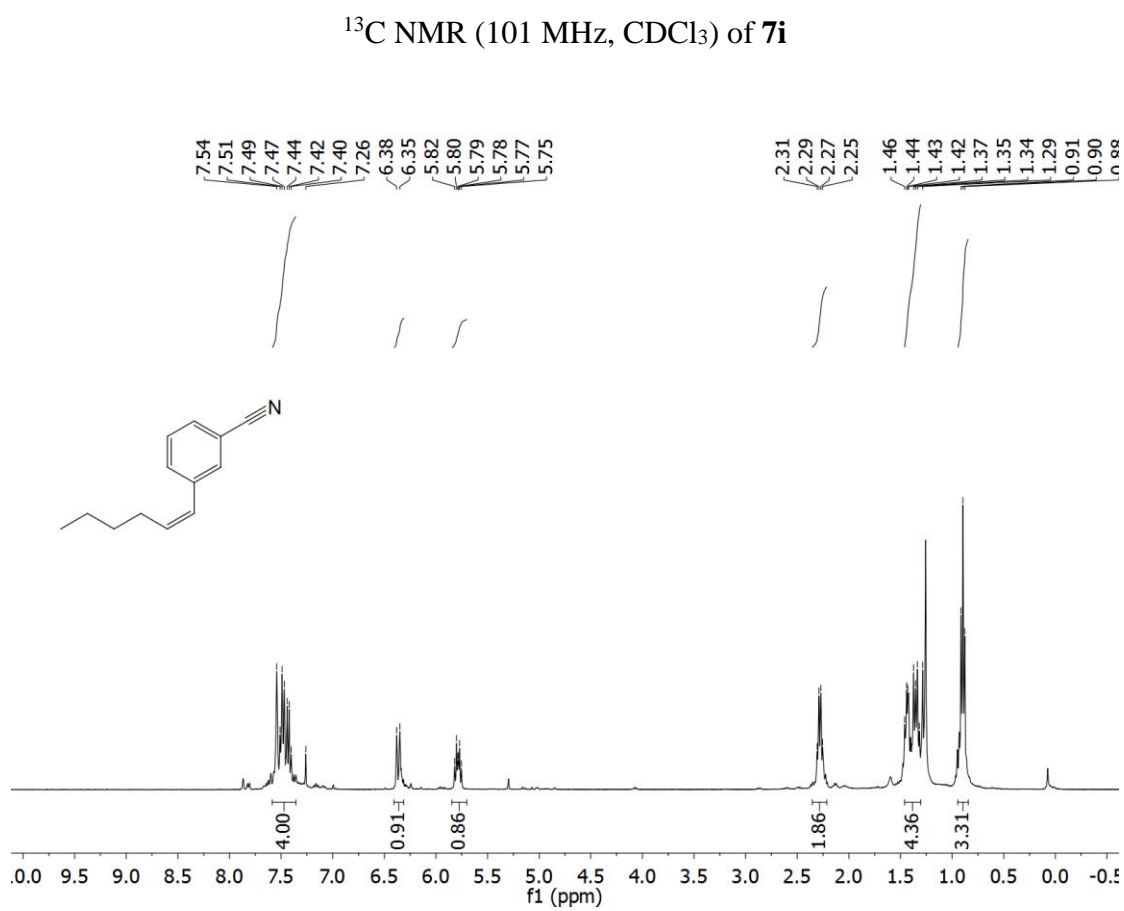



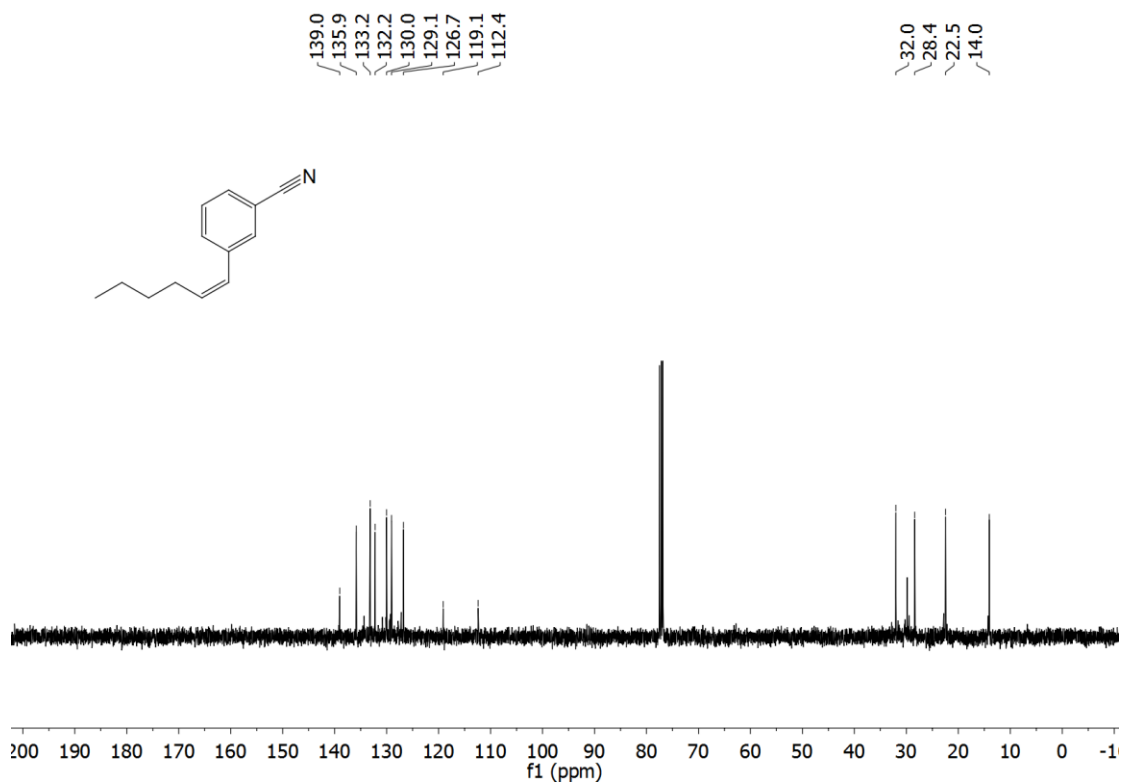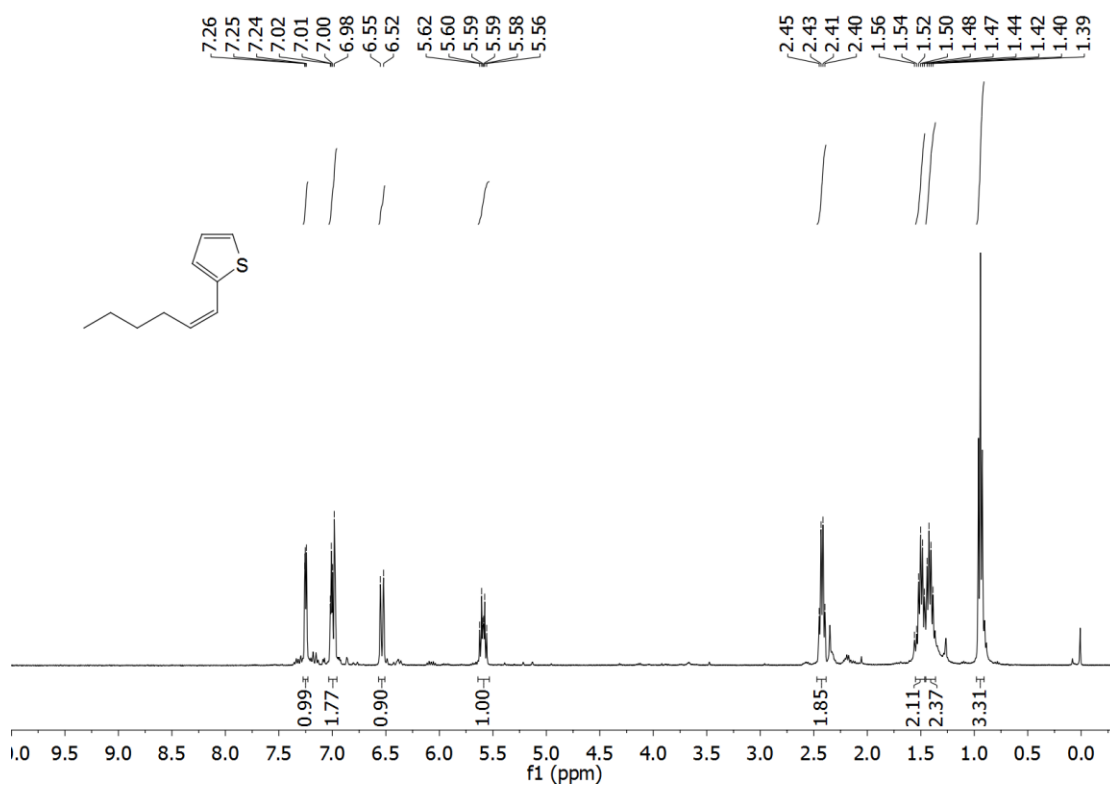

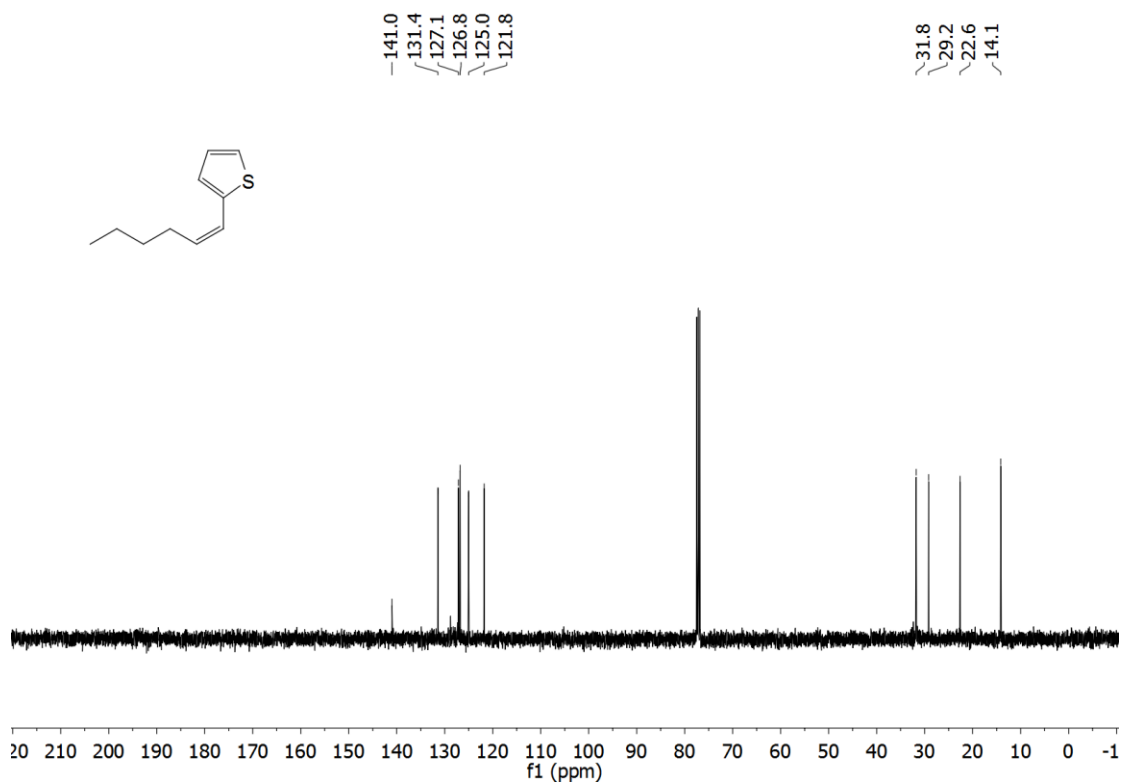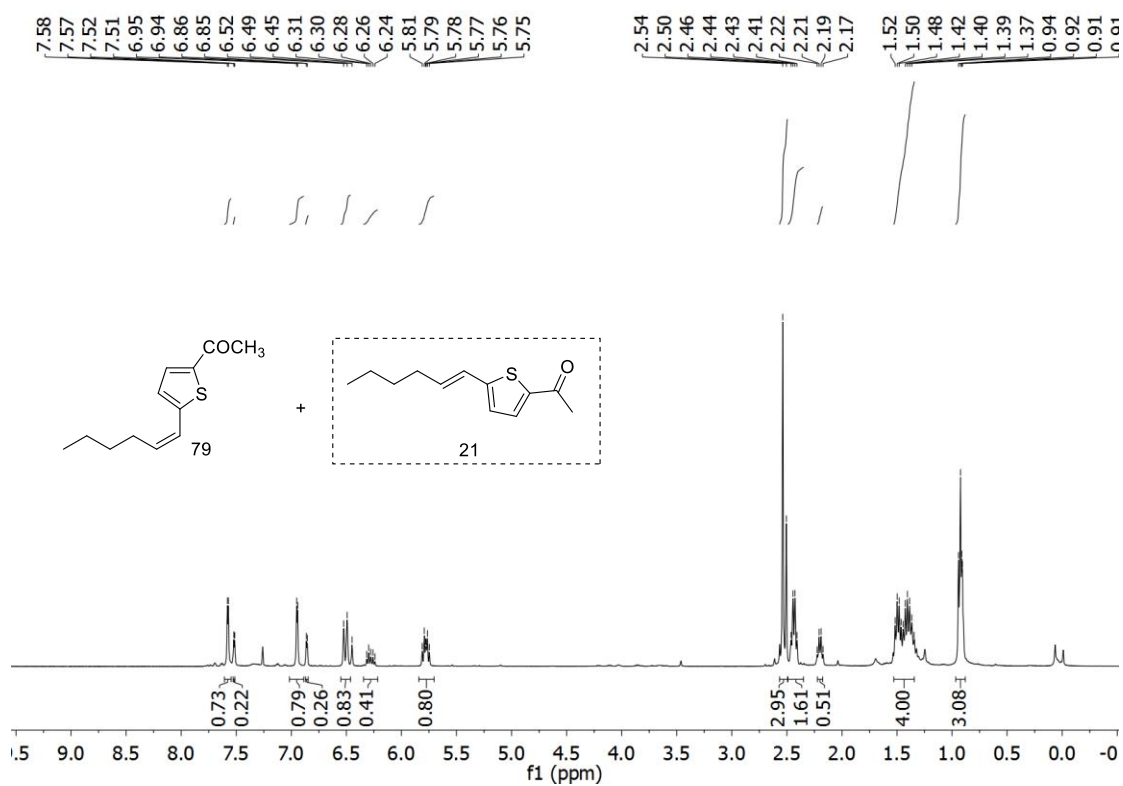

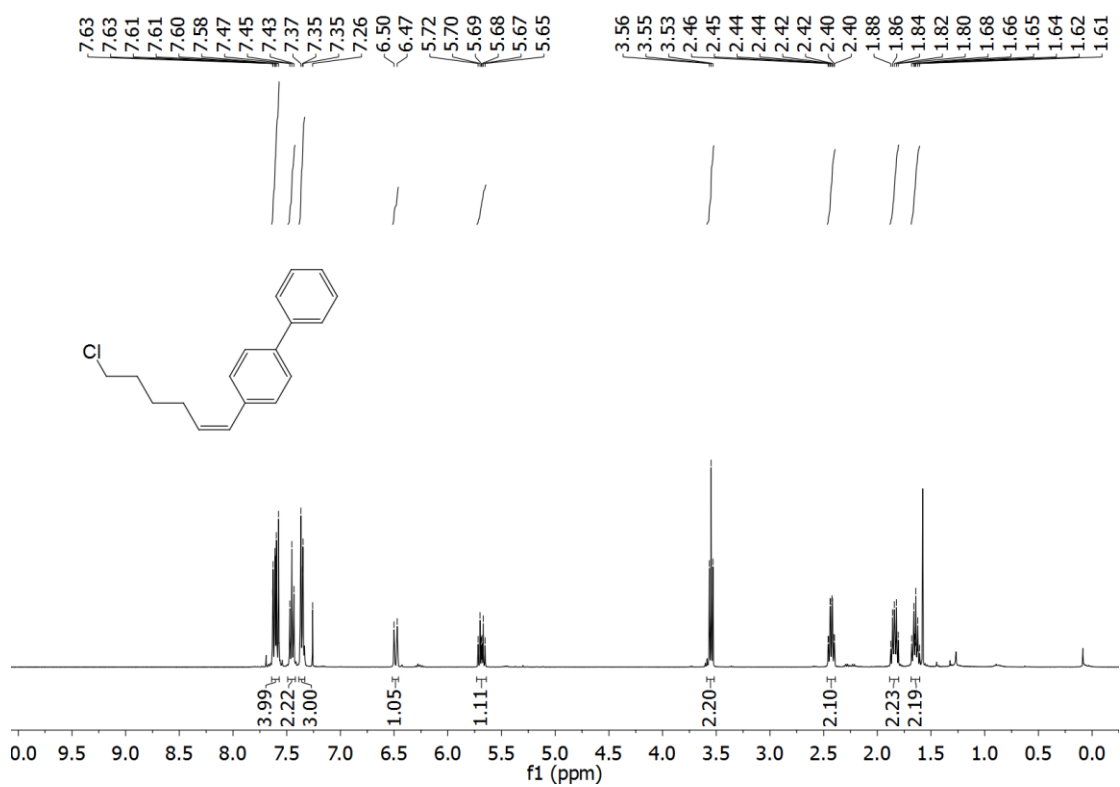

<sup>1</sup>H NMR (400 MHz, CDCl<sub>3</sub>) of **7m**

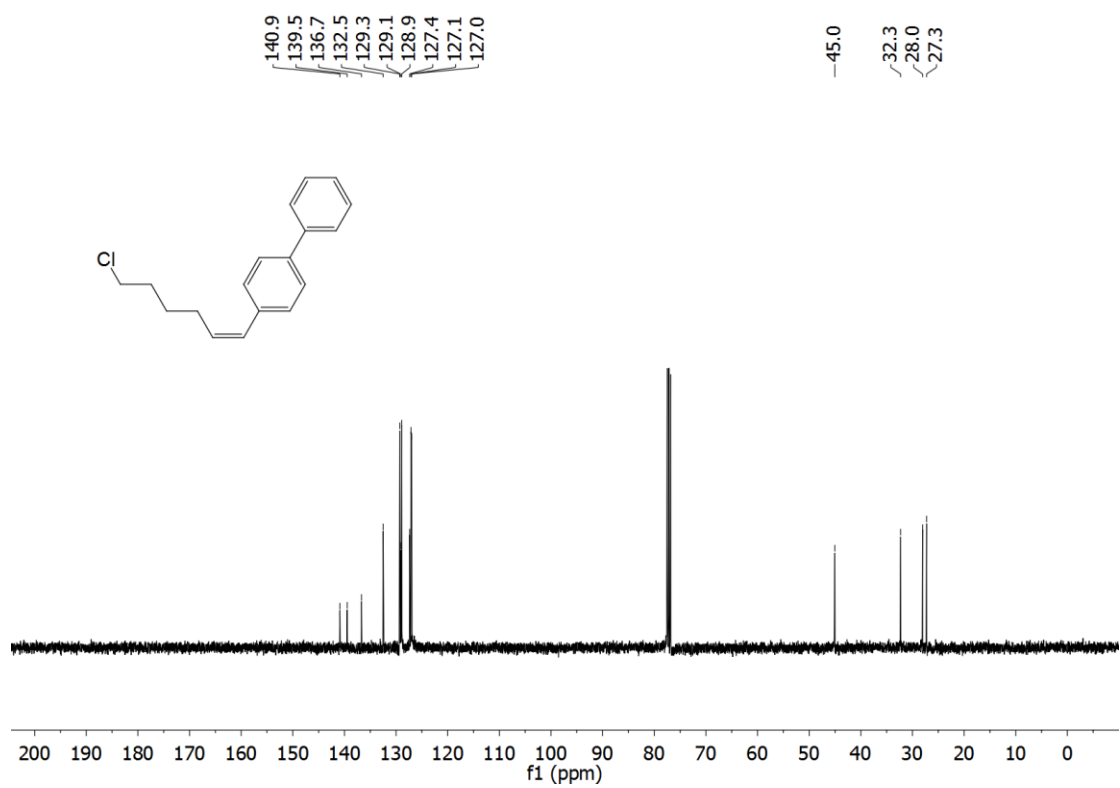

<sup>13</sup>C NMR (101 MHz, CDCl<sub>3</sub>) of **7m**

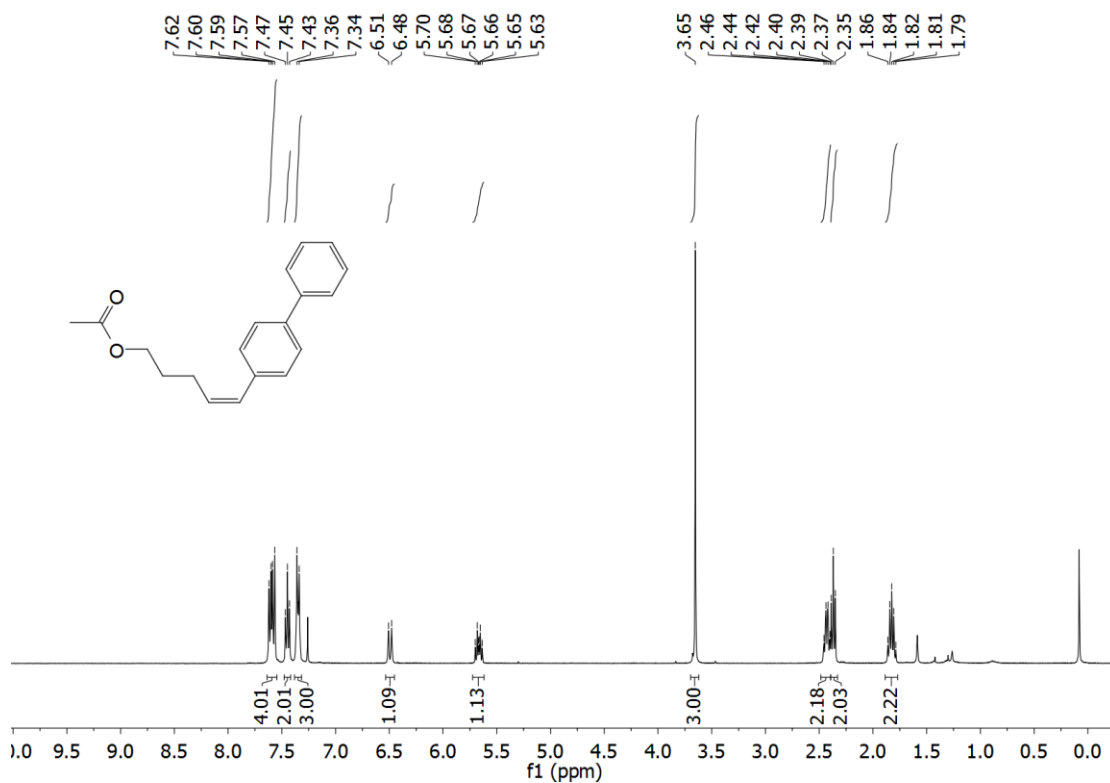

$^1\text{H}$  NMR (400 MHz,  $\text{CDCl}_3$ ) of **7n**

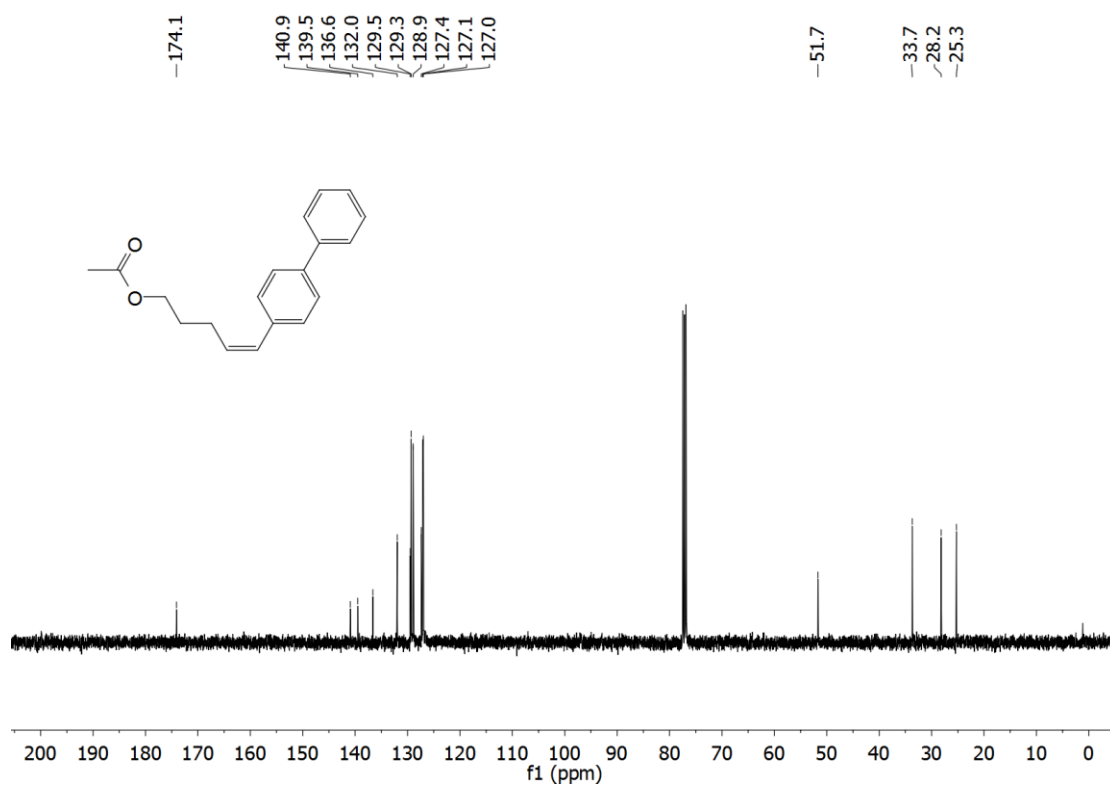

$^{13}\text{C}$  NMR (101 MHz,  $\text{CDCl}_3$ ) of **7n**
